# Supplementary material for: VASP-mediated actin dynamics activate and recruit a filopodia myosin
Source: eLife. 2021 May 27;10:e68082. doi: 10.7554/eLife.68082 (PMC8352590; doi:10.7554/eLife.68082)
Supplement: Figure 1—source data 1. [file elife-68082-fig1-data1.xlsx]

## Sheet: Cortical intensity SD
CORTICAL INTENSITY Standard deviation (cortical asymmetry)
Figure 1I. Cortical standard deviation measurements measured for each cell.
actin in Ax2 control	GFP-DdMyo7-Tail in Ax2 control	GFP-DdMyo7-motorFD in myo7-	GFP-DdMyo7 in myo7-
	1340.68	477.663	438.125
2704.45	603.111	1332.58	258.412
640.675	442.094	894.974	443.5
6699.81	188.45	1102.47	448.329
6776.78	199.041	1140.65	107.842
1524.55	263.744	2368.81	254.619
3372.16	180.603	1671.52	560.75
2827.1	210.524	2930.57	457.763
2431.26	355.371	175.01	373.507
816.022	233.076	922.081	194.524
2626.38	227.008	688.978	403.551
2566.19	281.729	1105.81	298.052
1385.33	301.738	689.458	219.928
299.332	154.953	893.387	313.189
488.014	204.219	572.164	1624.35
6992.45	240.22	866.319	133.017
181.802	563.336	1034.42	296.99
208.814	205.351	1485.31	642.119
121.388	347.558	1313.57	1164.25
172.774	376.399	2000.97	2117.54
138.459	387.738	1547.08	2534.54
192.657	351.24	1742.97	267.892
661.013	230.187	281.013	503.536
411.646	184.929	818.799	254.216
541.708	383.689	539.068	555.341
412.538	272.187	980.052	365.415
299.502	259.989	862.853	1388.34
1254.07	571.299	997.798	225.319
567.317	204.819	919.551	924.175
780.198	240.617	1086.14	348.025
1153.89	208.027	1110.53	509.061
339.768	289.197	624.968	314.331
803.264	201.997	1044.46	362.342
102.273	172.096	1376.86	754.313
141.151	569.759	1408.36	286.718
299.421	212.24	3080	512.488
345.192	172.122	366.183	445.19
878.611	292.061	1330.63	330.766
479.171	673.477	278.522	1072.95
155.981	1376.25	1271.19	2310.12
193.585	248.724	346.967	5143.57
375.282	310.528	1329.07	6116.41
2704.45	1968.17	2488.73	3097.18
640.675	603.099	1110.87	805.172
6699.81	215.474	2443.7	527.324
6776.78	222.527	984.217	923.918
1524.55	591.734	1195.56	685.506
3372.16	332.865	497.36	309.618
2827.1	191.497	1352.37	5874.53
2431.26	412.264	1325.56	1877.13
816.022	270.974	1772.52	3681.53
2626.38	336.34	203.896	1020.93
2566.19	506.668	586.145	472.01
1385.33	511.079	756.024	1458.16
299.332	196.8	480.267	1583.36
488.014	393.238	809.644	731.59
6992.45	546.519	359.781	515.95
171.391	709.53	752.5	3598.51
469.349	281.501	498.139	2441.82
342.726	372.3	1110.86	493.679
981.566	779.456	1080.5	303.281
260.947	706.904	1205.77	304.904
193.603	584.828	1198.67	2320.12
518.933	861.737	1479.53	519.057
1115.35	180.318	877.118	647.45
1813.35	682.741	1072.28	510.14
624.094	556.056	2518.09	2437.92
182.467	308.385	1419.86	4399.48
489.361	509.185	1017.8	2355.51
1222.39	383.761	535.902	832.148
720.496	513.833	943.069	2668.18
508.284	737.713	900.294	2044.3
461.055	234.074	991.32	325.33
734.626	586.665	951.3	1002.19
432.151	592.933	1893.62	1432.18
657.11	1010.87	1313.72	1179.75
140.418	714.571	271.267	1912.22
162.729	856.104	219.846	1570.99
114.622	181.079	336.584	2574.91
487.956	286.332	544.353	4026.98
482.099	409.181	827.086	1212.12
416.582	345.86	1199.11	4018.49
1318.32	632.765	562.437	833.021
809.259	1390.37	659.804	364.475
180.3	482.471	326.052	1831.16
497.736	254.882	537.752	782.484
723.318	1075.02	216.014	3063.18
1148.72	542.958	258.052	3093.07
474.282	200.615	211.112	2233.91
263.483	1875.89	1121.87	7224.85
203.679	1674.63	1486.3	2398.02
193.341	991.605	1369.45	4854.92
214.129	880.523	768.547	718.735
225.763	1170.86	1052.91	960.594
	603.882	234.966	2297.51
	1304.16	387.291	4776.14
	352.744	1702.18	2874.57
	340.552	1455.34	1261.68
	209.023	1426.73	4582.37
	2048.25	1064.13	2072.12
	1358.64	1093.07	4473.39
	508.178	397.921	2431.94
	194.362	1633.36	2591.29
	421.665	388.671	4079.72
	197.361	1437.19	3911.83
	487.372	651.678	3660.38
	1878.97	520.951	1910.08
	465.205	1535.91	2689.58
	473.645	3119.94	381.327
	938.199	1592.07	418.625
	1331.64	2979.38	181.873
	516.264	3152.09	546.862
	631.251	1841.49	394.582
	1788.35	1040.88	764.251
	1435.47	347.206	349.467
	1059.92	731.102	212.573
	1142	465.084	474.612
	507.714	1197.96	468.208
	699.877	1742.98	908.619
	580.711	1773.62	405.708
	809.941	818.203	237.608
	355.589	593.15	499.092
	323.654	1377.02	570.085
	1261.49	885.438	450.538
	469.965	485.39	1315.02
	460.851	2959.23	302.792
	802.556	932.493	1432.21
	949.606	2763.01	402.678
	1000.62	1897.47	987.381
	2064.36	1581.68	1758.81
	654.151	1370.88	4595.63
	1116.85	1283.37	578.166
	775.124	439.8	1536.32
	408.807	736.926	651.406
	424.138	1057.5	2173.59
	305.821	921.383	1503.97
	779.173	2521.61	2186.2
	551.34	2094.68	3069.03
	1749.96	1210.68	1233.58
	284.332	655.369	3171.9
	534.912	1534.59	5393.99
	723.636	822.227	319.877
	546.766	2071.66	1182.03
	254.137	715.593	312.066
	174.049	589.876	264.14
	291.395	2102.09	3433.55
	329.038	1333.83	462.556
	297.743	341.838	1509.76
	1113.19	356.821	5964.68
	280.021	430.043	350.415
	641.443	209.532	1558.67
	286.524	320.733	310.039
	796.722	240.165	185.745
	369.602	297.265	578.223
	240.392	556.849	1107.9
	381.835	735.478	3569.64
	406.502	577.544	375.654
	401.229	486.466	360.55
	372.312	974.007	268.504
	252.786	881.995	521.346
	348.963	1587.3	1787.74
	428.497	739.777	2833.15
	549.646	633.348	3663.22
	630.588	394.509	796.686
	324.196	728.072	644.794
	518.754	1155.74	3352.18
	218.317	503.766	2056.7
	250.376	809.833	692.754
	492.87	832.095	352.175
	728.527	1913.45	1271.66
	1586.04	2083.46	1880.1
	248.426	500.123	370.423
	288.295	702.011	249.485
	439.112	2211.37	565.034
	1173.63	891.049	811.566
	404.527	339.214	2403.6
	285.122	847.804	715.683
	673.258	1233.2	5079.5
	587.822	1542.08	255.989
	389.27	771.749	405.662
		1625.56	323.735
			133.162
			198.199
			224.775
			441.947
			98.0676
			144.364
			369.105
			418.351
			262.669
			273.55
			322.23
			244.284
			234.678
			1159.3
			1055.9
			954.218
			206.52
			1878.97
			465.205
			473.645
			938.199
			1331.64
			516.264
			631.251
			1788.35
			1435.47
			1059.92
			1142
			507.714
			699.877
			580.711
			809.941
			355.589
			323.654
			1261.49
			469.965
			460.851
			802.556
			949.606
			1000.62
			2064.36
			654.151
			1116.85
			775.124
			408.807
			424.138
			305.821
			779.173
			551.34
			1749.96
			284.332
			534.912
			723.636
			546.766
			254.137
			174.049
			291.395
			329.038
			297.743
			1113.19
			280.021
			641.443
			286.524
			796.722
			369.602
			240.392
			381.835
			406.502
			401.229
			372.312
			252.786
			348.963
			428.497
			549.646
			630.588
			324.196
			518.754
			218.317
			250.376
			492.87
			728.527
			1586.04
			248.426
			288.295
			439.112
			1173.63
			404.527
			285.122
			673.258
			587.822
			389.27
