# Supplementary material for: VASP-mediated actin dynamics activate and recruit a filopodia myosin
Source: eLife. 2021 May 27;10:e68082. doi: 10.7554/eLife.68082 (PMC8352590; doi:10.7554/eLife.68082)
Supplement: Figure 1—source data 2. [file elife-68082-fig1-data2.xlsx]

## Sheet: Cort. Int. SD Anova 
Figure 1I. CORTICAL INTENSITY SD ANOVA
Number of families	1
Number of comparisons per family	3
Alpha	0.05
Dunnett's multiple comparisons test	Mean Diff.	95.00% CI of diff.	Significant?	Summary	Adjusted P Value	A-?
actin - ax2 control vs. GFP-DdMyo7-Tail-ax2 control	670.1	354.3 to 985.8	Yes	****	<0.0001	B	GFP-DdMyo7-Tail-ax2 control
actin - ax2 control vs. GFP-DdMyo7-motorFD myo7-	163	-152.5 to 478.4	No	ns	0.4376	C	GFP-DdMyo7-motorFD myo7-
actin - ax2 control vs. GFP-DdMyo7-myo7-	48.05	-249.0 to 345.0	No	ns	0.9528	D	GFP-DdMyo7-myo7-
Test details	Mean 1	Mean 2	Mean Diff.	SE of diff.	n1	n2	q	DF
actin - ax2 control vs. GFP-DdMyo7-Tail-ax2 control	1242	571.5	670.1	136.9	93	180	4.895	722
actin - ax2 control vs. GFP-DdMyo7-motorFD myo7-	1242	1079	163	136.8	93	181	1.192	722
actin - ax2 control vs. GFP-DdMyo7-myo7-	1242	1194	48.05	128.8	93	272	0.3731	722
