# Supplementary material for: VASP-mediated actin dynamics activate and recruit a filopodia myosin
Source: eLife. 2021 May 27;10:e68082. doi: 10.7554/eLife.68082 (PMC8352590; doi:10.7554/eLife.68082)
Supplement: Figure 2—source data 1. [file elife-68082-fig2-data1.xlsx]

## Sheet: figure - source data 1 spline f
Figure 2F - actin intensity vs DdMyo7 intensity during pseudopod extension. Raw values normalized from 0-1 for each trace.
	experiment #
actin	401-10-actinValues	401-9-actinValues	440-4b	440-4	39.1	39.2	39.3	39.4	430-2	401-9b
0	0.234278
0.107682	0.079022
0.170332	0
0.168456	0.245701
0.311075	0.232771
0.574919	0.275876
0.612413	0.407971
0.698534	0.625921
0.9126	0.799406
1	0.963218
0.949307	1
0.525893	0.671694
0.393377	0.634639
0.356169	0.503616
0.243111	0.304748
0.406858	0.525279
0.289759	0.400556
0.032474		0
0		0.477393
0.034643		0.227417
0.027769		0.22708
0.033058		0.08433
0.151018		0.081736
0.350775		0.281186
0.600913		0.354675
0.813391		0.416964
1		0.840613
0.870127		1
0.782577		0.594125
0.7988		0.360113
0.811928		0.426909
0.848348		0.536061
0.539386			0.524653
0.304371			0.452328
0.051133			0.438642
0.109165			0.394363
0.288588			0.61772
0.341041			0.756338
0.406339			0.720352
0.307993			0.669781
0.2161			0.599337
0.235516			0.695224
0.311422			0.71284
0.441963			0.822761
0.676233			0.941334
0.808159			0.999683
0.821735			1
0.813611			0.999202
0.901589			0.915976
1			0.96118
0.98036			0.957201
0.949485			0.951935
0.95221			0.862294
0.93282			0.743724
0.816124			0.628701
0.650365			0.486932
0.378851			0.282385
0			0
0.125562				0.122384
0.11194				0.132358
0.119037				0.088287
0.220148				0.138225
0.119112				0.292752
0.110069				0.253283
0				0.057424
0.008253				0
0.063736				0.282552
0.369276				0.33838
0.415306				0.295611
0.202619				0.272179
0.036276				0.141382
0.045482				0.009903
0.078058				0.083206
0.133215				0.209348
0.186998				0.347566
0.243247				0.445925
0.240303				0.344194
0.256811				0.488616
0.281369				0.468255
0.547928				0.610675
0.738561				0.775278
0.761427				0.884873
0.871205				1
1				0.874006
0.908838				0.807734
0.895722				0.933131
0.391449					0.05951
0.47143					0.031525
0.398822					0.011528
0.374127					0.06598
0.259123					0.031267
0.267916					0
0.306549					0.027441
0.355922					0.099271
0.424871					0.038973
0.21829					0.092001
0.052937					0.103908
0					0.040097
0.091444					0.067049
0.370699					0.128234
0.626462					0.13316
0.716083					0.143593
0.723098					0.097457
0.720367					0.130832
0.932569					0.242205
0.99926					0.462103
0.999421					0.354261
0.999552					0.341982
0.999659					0.628836
0.999498					0.787034
0.999291					0.802542
0.999023					0.957839
0.999122					0.893567
0.999337					0.872636
0.999686					0.773162
0.999632					0.82012
0.999517					1
1					0.753416
0.966871					0.491685
0.883522					0.162499
0.050925						0
0						0.115384
0.188747						0.013799
0.395216						0.097626
0.24971						0.268233
0.415757						0.680537
0.331707						0.834222
0.139191						0.509608
0.074427						0.557162
0.30378						0.582678
0.378792						0.614215
0.473864						0.73665
0.640655						0.780289
0.768078						0.721944
0.766356						0.758126
0.604417						0.833599
0.707781						0.924387
0.887183						1
1						0.879077
0.990738						0.681892
0.91061						0.578951
0.034963							0.142924
0.020487							0
0.022863							0.182068
0							0.513177
0.052364							0.706243
0.015551							0.791507
0.098912							0.932307
0.24822							0.920917
0.260384							0.888015
0.391793							0.976756
0.441728							1
0.602355							0.805857
0.808094							0.774617
0.903292							0.824886
1							0.728293
0.964551							0.539319
0.974572							0.771873
0.944218							0.532549
0.798169							0.471393
0.828673							0.401455
0.85137							0.315018
0.691201							0.262542
0								0.186465
0.131944								0
0.343133								0.247634
0.27718								0.019706
0.490246								0.521885
0.514683								0.29212
0.900513								0.395476
0.839754								0.658595
1								0.491772
0.936974								1
0.893258								0.782633
0.937102								0.802861
0.756661								0.796599
0.578255								0.53819
0.421331								0.54897
0.496938								0.433391
0									0
0.239293									0.014694
0.673905									0.137681
0.936089									0.337376
1									0.473756
0.967675									0.61785
0.961015									0.776909
0.922987									0.820449
0.819605									0.900145
0.731225									0.882744
0.678072									0.850049
0.710031									0.965351
0.799774									1
0.708147									0.990734
0.653622									0.920921
0.622704									0.935878
0.608552									0.91173
0.631294									0.958959
0.60761									0.808591
0.619332									0.705308
0.494685									0.582918
0.231296									0.418809
0										0
0.007016										0.294938
0.08391										0.184363
0.170487										0.157515
0.310583										0.275252
0.655816										0.270517
0.892523										0.428647
1										0.570374
0.914803										0.870491
0.870323										1
0.812137										0.963357
0.825765										0.905609
0.850756										0.90284
0.78003										0.905744
0.697427										0.477524
