# Supplementary material for: VASP-mediated actin dynamics activate and recruit a filopodia myosin
Source: eLife. 2021 May 27;10:e68082. doi: 10.7554/eLife.68082 (PMC8352590; doi:10.7554/eLife.68082)
Supplement: Figure 3—source data 1. [file elife-68082-fig3-data1.xlsx]

## Sheet: tally
Figure 3B. Filopodia per cell
counted based on RFP-LifeAct signal
	myo7-	ax2 control	vasp-	dia-
	0	5	1	0
	0	2	1	0
	0	1	1	0
	0	0	2	0
	0	0	0	0
	0	0	0	0
	0	0	0	0
	0	0	0	0
	0	0	0	0
	0	0	0	0
	0	2	0	0
	0	1	0	0
	0	4	0	0
	0	3	0	0
	0	1	0	0
	0	1	0	0
	0	3	0	0
	0	0	0	0
	0	0	0	0
	0	0	0	0
	0	0	0	0
	0	0	0	0
	0	0	0	0
	0	0	0	0
	0	0	0	0
	0	4	0	0
	0	3	0	0
	0	1	0	0
	0	1	0	0
	0	4	0	0
	0	2	0	0
	0	0	0	0
	0	0	0	0
	0	0	0	0
	0	0	0	0
		0	0	0
		0	0	0
		0	0	0
		0	0	0
		0	0	0
		0	0	0
		3	0	0
		3	0	0
		5	0	0
		6	0	0
		1	0	0
		0	0	0
		0	0	0
		0	0	0
		0	0	0
		0	0	0
		0	0	0
		0	0	0
			0	0
			0	0
			0	0
			0	0
			0	0
			0	0
			0	0
			0	0
			0	0
			0	0
			0	0
			0	0
			0	0
			0	0
			0	0
			0	0
				0
				0
				0
				0
				0
				0
				0
				0
				0
				0
				0
				0
				0
				0
				0
				2
				2
				1
				3
				3
				2
				2
				2
				1
				4
				1
				1
				6
				4
				5
				1
				3
				4
				1
				3
				1
				1
				1
				4
				3
				1
				6
				5
				1
				3
				1
				2
				3
				1
				1
				3
				1
				3
				1
				3
				1
				4
				2
