# Supplementary material for: VASP-mediated actin dynamics activate and recruit a filopodia myosin
Source: eLife. 2021 May 27;10:e68082. doi: 10.7554/eLife.68082 (PMC8352590; doi:10.7554/eLife.68082)
Supplement: Figure 3—source data 2. [file elife-68082-fig3-data2.xlsx]

## Sheet: Figure 3 - source data 2 filopo
Figure 3B. filopodia counts Anova
Number of families	1
Number of comparisons per family	3
Alpha	0.05
Dunnett's multiple comparisons test	Mean Diff.	95.00% CI of diff.	Significant?	Summary	Adjusted P Value	B-?
control vs. myo7-	1.057	0.4453 to 1.668	Yes	***	0.0002	A	myo7-
control vs. vasp-	0.9841	0.4715 to 1.497	Yes	****	<0.0001	C	vasp-
control vs. dia-	0.2456	-0.2134 to 0.7045	No	ns	0.4365	D	dia-
Test details	Mean 1	Mean 2	Mean Diff.	SE of diff.	n1	n2	q	DF
control vs. myo7-	1.057	0	1.057	0.26	53	35	4.064	280
control vs. vasp-	1.057	0.07246	0.9841	0.218	53	69	4.514	280
control vs. dia-	1.057	0.811	0.2456	0.1952	53	127	1.258	280
