# Supplementary material for: VASP-mediated actin dynamics activate and recruit a filopodia myosin
Source: eLife. 2021 May 27;10:e68082. doi: 10.7554/eLife.68082 (PMC8352590; doi:10.7554/eLife.68082)
Supplement: Figure 3—source data 3. [file elife-68082-fig3-data3.xlsx]

## Sheet: Figure 3D VASP Myo7 Cortexcell
Figure 3D GFP-VASP GFP DdMyo7 cortex/cell ratio.
Compiled values for all measurements made for each strain
GFP-DdMyo7 in myo7-	GFP-DdMyo7 in vasp-	GFP-DdMyo7 in dia-	GFP-vasp in vasp-	GFP-vaspin myo7-
0.909945	1.15676	1.26055	1.18572	1.16278
0.894711	0.867112	1.31464	1.5607	0.955066
0.999738	1.04632	1.2809	0.805073	1.16972
1.11933	0.953206	1.34267	1.07878	0.903292
0.999162	1.37405	1.30813	1.20514	1.38878
1.20709	1.4415	1.25001	1.15559	1.25696
1.30089	0.917431	1.09887	1.25605	1.32891
1.19028	0.883295	1.50402	1.0497	1.38588
1.03007	0.98494	1.04711	0.973319	1.34171
1.15468	0.95513	1.21525	1.09067	1.10885
0.871627	0.941544	1.22769	1.15301	0.977639
1.03384	0.939505	1.14195	0.896081	1.42968
0.879394	0.975588	1.56453	1.12844	1.29703
0.943629	0.886724	1.16589	0.894908	0.891087
1.03402	0.879594	1.07136	0.936549	1.15144
0.892788	0.81396	1.16457	1.35722	1.24501
0.937108	0.79025	1.35604	1.28281	1.25773
1.05908	1.24618	1.14647	1.29789	1.65369
0.899137	0.943424	1.39219	1.3586	1.08007
1.16592	1.49141	1.18515	0.975337	1.08371
0.950612	0.880529	1.27803	0.92941	1.98015
0.900698	0.930652		1.01002	1.24246
0.929617	0.99531	1.13593		1.37447
1.1224	1.09133	1.25708	0.892185	1.14459
1.2027	0.866291	0.89338	0.909763	1.03411
0.913675	0.808656	1.2539	1.00114	0.77261
1.18206	1.15376	1.5816	0.912134	1.29514
1.1207	0.898239	1.4005	1.25488	0.933935
1.51158	1.13291	0.86111	0.903481	1.16467
1.37377	1.17866	1.28832	1.01659	1.42683
1.27319	1.30566	1.20956	1.11759	0.849712
0.92076	0.92711	1.14133	1.42034	1.15236
0.930184	0.870133	1.27106	1.31572	1.26259
1.02241	0.898397	1.20887	1.3066	1.0315
1.14864	0.985306	1.01422	0.901748	0.954827
1.00079	0.942322	1.51303	1.20729	1.03227
1.11266	0.904993	1.01236	1.26011	1.2916
1.11359	1.05538	1.33505	0.942076	1.20091
1.2956	0.923487	1.22005	1.35453	0.930089
1.47733	0.776085	1.08815	1.12628	1.13296
0.946268	1.20001	1.20377	0.943402	0.972711
1.70311	1.56939	1.2156	1.32598	1.02279
0.985134	1.02097	1.19451	0.856697	1.07955
1.00077	1.10656		0.945084	1.20233
1.29416	1.14869	1.37498	1.06933	0.953467
1.19328	1.04427	1.07725	1.22639	0.973626
0.922337	1.48078	1.09148	1.21292	0.897214
1.09114	1.05583	1.31226	1.41038	1.73387
0.956444	1.17577	0.948573	1.1463	1.02942
0.952727	0.939491	0.925793	1.2424	0.905427
1.20127	1.06323	1.52609	0.95555	0.916957
1.07206	0.986632	1.04445	1.03763	0.897881
1.50301	0.859399	1.36507	1.03453	1.10522
1.48212	0.841078	0.96645	1.20521	1.18737
1.15657	0.943259	1.10776	1.12787	1.06957
1.03316	0.893233	1.11625	0.93156	1.10845
0.925889	1.09415	1.10525	1.15653	0.979227
1.11232	0.956225	0.779032	1.27074	1.10536
1.37854	0.860319	1.11651	1.04697	1.08536
0.926137	0.852052	1.86132	1.23697	1.57209
0.869782	0.865917	1.42552	1.03625	1.00385
0.874385	0.844377	1.03883	1.2495	1.02935
1.01197	0.922736	1.53805	1.321	1.88594
1.11691	0.866228	0.860033	1.15835
0.997944	1.04567	1.07964	0.936372	1.27745
1.14518	0.869115		1.23618	1.33204
1.34901	0.849966	0.900044	0.997038	0.974142
1.48023	0.952653	1.56468	1.13492	1.38625
1.23725	1.03812	1.27137	1.10655	1.26889
0.81068	0.859288	1.00512	0.971316	1.22706
0.939732	1.029	0.953533	1.17829	1.49207
0.991371	0.888415	0.912352	0.928922	1.09842
0.925573	0.987546	1.08582	1.18572	0.876861
1.24076	1.61703	0.861385	1.5607	0.939084
0.924294	0.908505	0.912606	0.805073	1.21772
0.835673		1.02847	1.07878	1.15244
0.841989		0.958947	1.20514	0.868265
1.0404		1.1686	1.15559	1.92626
0.881993		1.79089	1.25605	1.3411
1.32152		1.10681	1.0497	0.792341
0.861035		1.21695	0.973319	0.967615
1.00178		1.07336	1.09067	1.07012
0.953931	1.12547	1.09252	1.15301	0.944118
0.963907	1.01233	0.910314	0.896081	1.27482
0.888938	1.2691	0.978014	1.12844	1.26473
1.06672	1.10291	1.16591	0.894908	1.55159
1.17952	0.823637	1.12422	0.936549	1.28013
0.948451	0.959217	1.13501	1.35722	0.862316
1.74774	1.19564	0.969809	1.28281	1.15114
1.81293	1.03769	0.824752	1.29789	1.0025
1.42918	1.14114	1.68245	1.3586	1.22628
1.38636	1.27477	0.832398	0.975337
0.936309	1.1842	1.22485	0.92941
1.04001	1.1253	1.39929	1.01002
1.35811	1.58655	1.52111
1.29219	1.45417	1.32155	0.892185
0.872796	0.93053	1.3445	0.909763
1.06762	1.17801	1.10587	1.00114
1.47092	1.12481	0.931845	0.912134
0.913398	1.21308	1.15364	1.25488
1.36482	1.00554	1.37567	0.903481
1.14972	1.12149	1.09522	1.01659
1.12491	0.970623	0.987308	1.11759
0.894576	1.41702	1.04421	1.42034
1.15393	0.967258	0.946595	1.31572
0.925678	1.49176	1.1554	1.3066
1.29457	1.17082	0.817036	0.901748
1.36577	1.58075	1.37062	1.20729
1.23141	1.19348	1.48364	1.26011
1.05832	1.16138	1.59662	0.942076
1.15394	1.13356	1.0534	1.35453
1.05082	1.205	0.957808	1.12628
0.860065	1.18017	1.22043	0.943402
0.945022	1.26392	1.22832	1.32598
1.08678	1.18783	0.992837	0.856697
0.885856	1.62107	0.971887	0.945084
1.3405	1.3452	0.951949	1.06933
1.21814	1.30126	0.890714	1.22639
1.36681	1.1072	0.944527	1.21292
1.16881	1.27268	1.18961	1.41038
1.11688	0.984239	1.44542	1.1463
1.33142	1.10918	1.01285	1.2424
0.949827	1.07048	0.979359	0.95555
0.843927	0.846726	0.990624	1.03763
0.900465	1.0099	1.00712	1.03453
1.33588	0.890623	1.02927	1.20521
1.38346	1.06484	1.63995	1.12787
1.65721	0.955108	1.07462	0.93156
1.25776	0.849368	0.997415	1.15653
1.2069	0.995251	0.8856	1.27074
1.3559	1.22468	1.75775	1.04697
1.20729	1.07958	1.51298	1.23697
1.0774	1.11132	1.09338	1.03625
1.49551	1.09852	1.01213	1.2495
1.3761	0.824266	0.971071	1.321
1.10314	1.24992	0.941486	1.15835
1.51852	1.11858	1.21765	0.936372
1.42315	0.924525	1.54885	1.23618
1.15131	0.99348	0.934659	0.997038
1.34042	1.0536	1.12581	1.13492
1.64512	1.08175	0.888517	1.10655
1.2661	1.34333	1.10553	0.971316
1.74154	0.942601	0.968291	1.17829
1.08623	0.944637	1.82495	0.928922
	1.00316	1.0063	1.03688
1.54739	0.986456	0.908245	0.868392
1.36318	1.01025	1.00687	1.35117
1.46941	1.02359	1.15389	1.23135
0.890037	1.05817	0.920612	0.994277
0.845618	1.31977	1.41615	0.972516
	0.915441	1.11066	1.21669
1.03838	1.18231	1.08416	1.23222
1.06942	1.22572	1.10602	1.5113
1.55236	0.788621		1.03961
1.46523	1.10707	1.36249	1.21551
	1.27646	0.933427	1.10189
1.41608	1.44254	1.1671	1.25977
	1.134	0.867652	0.940209
	1.01125	0.908405	1.87258
	0.991165	1.11479	0.966384
	1.15658	1.04394
	0.851268	1.3064	1.00179
	0.954765	1.13301	0.921089
	1.00852	1.23664	0.941549
	1.1979	1.03398	1.19179
	1.01908	1.07896	1.03297
	1.24488	0.926748	0.866596
	0.895482	0.959134	1.04506
	1.03198	0.910034	0.992
	1.02707	0.959525	1.07934
	1.00948	0.981594	1.16948
	0.934944	1.25296	1.18206
	1.16827	0.941186	1.26266
	1.1475		1.11623
	1.12639		1.23653
	0.897867		1.14848
	0.950324		1.17618
	1.00148		1.1334
	0.971175		1.19451
	1.08549		1.38875
	1.28578		0.928135
	1.3429		1.00362
	1.07616		1.2008
	0.947998		1.73704
	1.21398		1.20656
	1.18414		0.999724
	0.918983		1.56754
	1.10384		1.1592
	0.818951		1.23167
	1.2589		1.23967
	1.08084		1.30232
	1.10525		1.25194
	1.02744		1.20916
	1.293		1.41443
	1.22097		1.15129
	0.969646		0.989355
	1.22135		1.40026
	1.38037		1.0801
	1.00532		0.915306
	1.12892		1.1051
	1.07375		1.11505
	1.08552		1.01676
	1.02073		1.0864
	0.968976		1.40078
	0.923275		1.04424
	1.11772		1.6278
	0.869345		1.30683
	1.07969		0.929268
	1.0107		1.74641
	0.986619		0.86697
	1.101		0.985757
	0.848383		1.07006
	0.839317		0.894707
	1.33241		1.39452
	0.859363		1.14228
	1.00295		1.27212
	1.23489		0.906638
	0.920569		0.847429
	0.860237		1.12493
	0.883454		1.30973
	0.899221		1.08072
	1.28364		1.26598
	0.910744		1.36324
	1.01427		1.25883
	0.942031		1.37074
	0.916741		1.09342
	1.24305		1.66627
	1.09461		1.39686
	0.950924		0.889875
	1.11726
	0.934719		1.04198
	1.10394		1.51113
	1.00693		1.12344
	1.02707		1.10042
	1.13045		1.05389
	0.824441		1.2866
	0.947055		1.16495
			0.947265
			1.40812
			1.73802
			1.28052
			1.27948
			1.44908
			1.68513
			0.830181
			1.09703
			1.27787
			1.26884
			1.12134
			1.17086
			1.18877
			1.00903
			0.947722
			1.097
			1.54936
			1.16231
			1.30214
			1.84573
			1.0913
			1.29238
			1.12662
			0.906922
			0.878837
			1.00441
			1.2685
			1.02505
			1.05845
			0.992679
			1.12161
			1.00638
			0.933185
			0.892108
			1.11482
			1.11047
			0.996715
			0.96316
			1.0215
			1.20589
			1.14363
			1.15462
			1.17455
			1.05571
			1.15648
			1.24431
			1.32704
			1.55202
			0.966162
			0.953655
			0.934545
			1.09509
			1.19945
			0.663359
			0.971831
			1.40156
			1.15521
			1.22452
			1.40575
			1.48061
			1.36556
			0.93659
			0.935416
			1.08203
			1.06945
			1.18458
			1.50125
			1.02522
			0.897808
			0.792318
			1.02615
			1.72034
			1.19589
			1.0732
			1.19593
			1.65438
			1.10548
			1.28483
			1.12399
			0.873554
			1.46138
			0.929713
			1.28049
			1.76555
			1.0003
			0.921913
			1.46769
			0.942326
			1.30483
			1.00597
			1.62616
			1.22664
			1.22984
			0.941639
			1.04862
			1.24896
			1.14113
			1.2142
			1.03349
			1.53262
			0.965906
			1.40984
			0.9101
			1.09654
			1.00623
			1.03864
			1.07859
			1.39082
			0.931397
			1.1938
			1.01531
			0.973904
			0.957055
			0.980702
			0.958258
			1.26964
			0.94746
			1.19258
			0.91782
			1.15915
			1.54749
			1.66614
			1.23549
			1.0512
			0.9709
			0.894336
			1.23613
			1.33095
			1.01707
			1.71474
			1.10809
			1.08004
			1.17529
			1.07918
			0.923926
			1.20796
			1.37302
			1.10412
			0.985235
			1.27289
			1.30746
			1.25765
			1.20621
			1.7521
