# Supplementary material for: VASP-mediated actin dynamics activate and recruit a filopodia myosin
Source: eLife. 2021 May 27;10:e68082. doi: 10.7554/eLife.68082 (PMC8352590; doi:10.7554/eLife.68082)
Supplement: Figure 3—source data 4. [file elife-68082-fig3-data4.xlsx]

## Sheet: Myo7; vasp dia ANOVA
Figure 3D GFP_Myo7 Anova
Figure 3D Cortex: cell measurement ANOVA
Number of families	1
Number of comparisons per family	2
Alpha	0.05
Dunnett's multiple comparisons test	Mean Diff.	95.00% CI of diff.	Significant?	Summary	Adjusted P Value	A-?
GFP-DdMyo7 - myo7- vs. GFP-DdMyo7 - vasp-	0.0819	0.03496 to 0.1288	Yes	***	0.0003	B	GFP-DdMyo7 - vasp-
GFP-DdMyo7 - myo7- vs. GFP-DdMyo7- dia-	-0.01051	-0.06074 to 0.03971	No	ns	0.8512	F	GFP-DdMyo7>dia-
Test details	Mean 1	Mean 2	Mean Diff.	SE of diff.	n1	n2	q	DF
GFP-DdMyo7 - myo7- vs. GFP-DdMyo7 - vasp-	1.143	1.061	0.0819	0.02124	154	230	3.856	550
GFP-DdMyo7 - myo7- vs. GFP-DdMyo7- dia-	1.143	1.153	-0.01051	0.02272	154	169	0.4627	550

## Sheet: GFP-vasp t-test
Figure 3D GFP-VASP t-test
Table Analyzed	all - of gfp-vasp gfp-myo7 cortex
Column E	gfp-vasp-myo7
vs.	vs.
Column D	gfp-vasp-vasp
Unpaired t test
P value	0.5262
P value summary	ns
Significantly different (P < 0.05)?	No
One- or two-tailed P value?	Two-tailed
t, df	t=0.6342, df=466
How big is the difference?
Mean of column D	1.148
Mean of column E	1.164
Difference between means (E - D) ± SEM	0.01572 ± 0.02478
95% confidence interval	-0.03298 to 0.06442
R squared (eta squared)	0.0008625
F test to compare variances
F, DFn, Dfd	1.417, 89, 377
P value	0.0281
P value summary	*
Significantly different (P < 0.05)?	Yes
Data analyzed
Sample size, column D	378
Sample size, column E	90
