# Supplementary material for: VASP-mediated actin dynamics activate and recruit a filopodia myosin
Source: eLife. 2021 May 27;10:e68082. doi: 10.7554/eLife.68082 (PMC8352590; doi:10.7554/eLife.68082)
Supplement: Figure 4—figure supplement 1—source data 1. [file elife-68082-fig4-figsupp1-data1.xlsx]

## Sheet: V1 filo counts
V1 filopodia counts
mNeon-DdMyo7 V1-GFP in G121	mNeon-DdMyo7 (No V1 OE); G121
0	0
0	0
0	0
1	0
0	0
0	0
0	0
0	0
0	0
0	0
0	0
7	0
8	0
0	0
0	0
0	0
0	0
0	0
0	0
1	0
8	0
0	0
3	3
3	0
0	0
5	1
0	0
4	0
1	0
5	0
2	0
24	0
3	2
10	2
9	0
3	1
0	0
0	0
3	0
0	0
2	0
2	0
0	0
0	0
2	0
0	0
0	0
5	1
0	1
0	2
0	0
0	0
0	0
0	0
0	0
1	0
0	0
1	0
0	0
5	0
2	0
4	0
2	1
1	0
0	0
0	0
11	0
3	0
0	1
3	6
6	0
7	0
2	1
5	0
2	0
2	0
0	0
2	0
2	0
2	0
4	0
15	1
	0
	0
	0
	1
	1
	0
	0
