# Supplementary material for: VASP-mediated actin dynamics activate and recruit a filopodia myosin
Source: eLife. 2021 May 27;10:e68082. doi: 10.7554/eLife.68082 (PMC8352590; doi:10.7554/eLife.68082)
Supplement: Figure 4—figure supplement 1—source data 2. [file elife-68082-fig4-figsupp1-data2.xlsx]

## Sheet: Fig 4 filo t-test
Figure 4 supplement 1: V1 filopodia t-test
Table Analyzed	v1 in wTmanual count filopodia
Column C	No V1 OE
vs.	vs.
Column A	V1-GFP
Unpaired t test
P value	<0.0001
P value summary	****
Significantly different (P < 0.05)?	Yes
One- or two-tailed P value?	Two-tailed
t, df	t=4.958, df=169
How big is the difference?
Mean of column A	2.354
Mean of column C	0.2809
Difference between means (C - A) ± SEM	-2.073 ± 0.4181
95% confidence interval	-2.898 to -1.247
R squared (eta squared)	0.127
F test to compare variances
F, DFn, Dfd	21.75, 81, 88
P value	<0.0001
P value summary	****
Significantly different (P < 0.05)?	Yes
Data analyzed
Sample size, column A	82
Sample size, column C	89
