# Supplementary material for: VASP-mediated actin dynamics activate and recruit a filopodia myosin
Source: eLife. 2021 May 27;10:e68082. doi: 10.7554/eLife.68082 (PMC8352590; doi:10.7554/eLife.68082)
Supplement: Figure 4—source data 1. [file elife-68082-fig4-data1.xlsx]

## Sheet: Fig 4C - phalloidV1
Figure 4C Actin Scan - Phalloidin Staining vasp null + V1
	vasp-			vasp- + V1
Bin number	mean	SD	n	mean	SD	n
0	434.148	58.112	29	442.877	63.2357	28
1	438.993	62.1057	29	448.79	69.0546	28
2	446.531	67.0431	29	457.267	77.2179	28
3	456.113	74.6506	29	473.555	97.3898	28
4	470.535	89.3094	29	496.689	136.14	28
5	491.892	109.842	29	539.389	213.182	28
6	534.854	182.766	29	601.688	293.667	28
7	601.141	270.046	29	705.493	430.507	28
8	658.704	270.845	29	819.005	495.702	28
9	694.923	257.812	29	899.968	532.039	28
10	729.665	242.711	29	924.317	500.562	28
11	740.767	234.169	29	910.487	443.277	28
12	742.586	225.116	29	904.615	388.638	28
13	748.577	217.055	29	907.769	370.072	28
14	741.568	208.515	29	903.44	335.929	28
15	732.622	192.552	29	892.634	322.07	28
16	723.99	174.482	29	876.815	317.871	28
17	719.465	167.628	29	848.449	279.396	28
18	717.327	162.113	29	817.674	244.376	28
19	714.948	161.929	29	798.477	225.67	28
20	715.816	166.953	29	796.24	223.565	28
21	716.834	173.626	29	788.411	221.103	28
22	716.32	182.545	29	778.205	213.567	28
23	715.465	181.724	29	774.977	207.957	28
24	718.541	179.802	29	772.217	207.058	28
25	721.669	181.656	29	772.331	209.495	28
26	723.025	180.356	29	774.413	211.24	28
27	717.994	178.509	29	770.706	207.569	28
28	715.105	178.566	29	774.93	210.394	28
29	715.96	180.057	29	774.997	209.204	28
30	721.092	181.154	29	775.265	206.043	28
31	724.171	185.865	29	772.077	207.167	28
32	716.798	185.185	29	776.329	218.147	28
33	715.218	191.337	29	777.141	231.42	28
34	704.44	191.642	29	770.096	233.465	28
35	693.816	203.46	29	759.329	229.325	28
36	676.221	200.685	29	748.909	232.486	28
37	650.811	203.774	29	728.502	240.953	28
38	622.809	201.867	29	713.291	248.787	28
39	589.745	200.068	29	679.836	247.29	28
40	552.449	187.638	29	652.693	256.47	28
41	508.945	124.248	29	632.035	279.416	28
42	487.094	105.382	29	633.163	334.865	28
43	470.635	90.9505	29	617.22	333.058	28
44	456.539	80.2553	29	569.031	247.132	28
45	449.687	76.2138	29	534.719	204.587	28
46	442.311	72.4272	29	506.07	152.236	28
47	436.373	68.6457	29	488.601	128.553	28
48	434.198	66.1391	29	479.175	117.294	28
49	429.683	62.6604	29	474.266	117.342	28

## Sheet: Fig4D - phalloidin diaCA
Figure 4D Actin Scan - Phalloidin Staining vasp null + diaCA
	diaCA>vasp-			control			vasp-
Bin number	mean	SD	n	mean	SD	n	mean	SD	n
0	496.773	328.032	31	427.152	136.133	32	245.292	118.624	44
1	544.648	368.535	31	454.436	141.8	32	254.827	115.095	44
2	617.136	423.219	31	494.923	149.565	32	278.772	129.089	44
3	734.333	545.639	31	551.486	174.904	32	320.808	177.162	44
4	911.242	672.716	31	637.11	229.185	32	370.055	225.993	44
5	1237.99	1033.42	31	764.073	341.329	32	449.522	296.223	44
6	1518.28	1263.4	31	929.725	486.845	32	590.502	468.996	44
7	1739.63	1395.08	31	1165.12	625.814	32	692.755	576.173	44
8	1940.17	1445.49	31	1513.09	779.645	32	766.009	587.056	44
9	2078.59	1341.97	31	1829.91	894.228	32	870.244	671.726	44
10	2183.66	1216.03	31	1939.03	843.995	32	940.15	742.151	44
11	2337.53	1131.7	31	1927.98	803.433	32	1027.03	835.757	44
12	2513.51	1124.84	31	1937.71	893.6	32	1092.97	815.427	44
13	2613.39	1111.76	31	1948.46	923.066	32	1148.49	859.982	44
14	2649.7	1190.07	31	1825.52	838.812	32	1191.87	885.527	44
15	2553.51	1242.22	31	1738.76	696.98	32	1204.15	926.153	44
16	2456.5	1216.56	31	1700.42	665.451	32	1227.74	1035.15	44
17	2340.28	1138.14	31	1643.5	657.246	32	1212.88	1074.42	44
18	2249.4	1091.57	31	1585.16	659.743	32	1151.03	918.16	44
19	2134.23	1027.66	31	1511.8	582.081	32	1110.69	816.927	44
20	2032.73	997.718	31	1444.56	534.265	32	1048.3	754.238	44
21	1986.43	974.026	31	1486	631.093	32	1010.77	711.473	44
22	1924.41	966.91	31	1493.65	686.802	32	949.784	611.385	44
23	1834.62	928.182	31	1482.29	652.446	32	907.557	515.753	44
24	1761.62	867.668	31	1429.96	546.272	32	900.586	481.136	44
25	1718.29	784.909	31	1347.19	459.623	32	892.945	510.207	44
26	1681.1	738.574	31	1354.84	481.227	32	864.458	478.023	44
27	1659.63	696.597	31	1397.54	564.768	32	872.562	480.579	44
28	1624.98	690.643	31	1490.61	716.014	32	849.597	446.682	44
29	1594.89	718.815	31	1498.39	754.017	32	826.34	401.296	44
30	1581.7	773.021	31	1493.64	761.691	32	823.661	427.693	44
31	1570.06	732.809	31	1489.24	761.328	32	805.79	442.49	44
32	1570.76	711.451	31	1439.26	663.526	32	791.6	464.926	44
33	1568.6	702.216	31	1424.28	598.3	32	810.227	568.169	44
34	1543.02	668.924	31	1444.54	619.627	32	837.833	714.316	44
35	1518.14	673.921	31	1403.17	603.284	32	840.252	753.404	44
36	1521.7	733.122	31	1353.74	587.646	32	838.563	799.368	44
37	1454.23	765.76	31	1230.21	526.849	32	777.763	766.822	44
38	1409.55	836.395	31	1146.2	446.691	32	707.39	738.367	44
39	1359.61	927.87	31	1074.44	427.16	32	635.458	697.637	44
40	1207.23	918.327	31	932.26	409.711	32	540.805	523.441	44
41	1027.93	759.675	31	849.484	429.103	32	448.167	302.088	44
42	811.953	528.586	31	782.977	459.446	32	411.379	276.082	44
43	642.236	361.921	31	725.036	453.295	32	370.388	261.961	44
44	549.505	299.089	31	653.256	387.322	32	321.464	211.371	44
45	488.815	260.914	31	564.898	290.067	32	276.292	137.677	44
46	447.948	236.664	31	482.149	168.791	32	252.684	115.26	44
47	414.186	218.288	31	443.853	147.627	32	239.183	103.511	44
48	390.542	205.61	31	420.127	142.474	32	229.677	98.7553	44
49	369.453	194.327	31	404.475	142.281	32	225.031	102.615	44
