# Supplementary material for: VASP-mediated actin dynamics activate and recruit a filopodia myosin
Source: eLife. 2021 May 27;10:e68082. doi: 10.7554/eLife.68082 (PMC8352590; doi:10.7554/eLife.68082)
Supplement: Figure 4—source data 2. [file elife-68082-fig4-data2.xlsx]

## Sheet: vasp- jasp V1 diaCA
Figure 4E vasp null: jasp, V1, dia CA cortex
GFP-DdMyo7 (i504) in vasp null		GFP-Ddmyo7 in vasp null		GFP-DdMyo7 in vasp null
- no drug	- 100nm jasp	no doxy v1 control	+ doxy v1	+diaWT	+diaCA
1.07057	1.02701	1.02638	1.18397	1.40965
1.20919	1.00416	1.0205	0.969622	1.40057	2.22603
1.03283	1.1821	1.08029	1.03781	1.47577	2.40412
0.8433	0.89204	1.30596	1.03763	2.67905	1.93882
1.32726	1.01173	1.13849	1.11106		0.938918
1.13677	1.06424	1.31049	1.1296	1.42307	3.65136
1.33608	1.32929	1.60796	1.0381	1.34308	2.74555
0.875093	1.09773	1.13778	1.0837	1.45191	2.03389
1.01512	1.26	1.07832	1.33778	1.97263	0.880018
0.919685	1.05615	1.16344	1.11412	1.00341	2.77477
1.04596	0.811072	1.24134	1.72395	1.22191	2.63043
0.951907	0.988479	1.13782	1.51199	1.36575	2.48017
1.42309	1.09266	1.29569	0.960358	1.13516	1.68281
0.897672	1.00146	1.32451	1.19247	2.23087	1.65577
0.900779	1.32749	0.851468	1.14773	0.966975	2.34355
1.06651	0.889462	1.24152	1.32983	2.38363	3.83263
1.20349	1.01579	1.05382	1.67154	1.03537	2.8106
0.945644	1.0634	1.48063	1.08408	0.814051	0.999485
0.837872	0.946742	1.35012	1.13198		1.62986
1.05655	1.0772	1.31534	1.38305	1.49448	3.28232
0.953758	0.996173	1.04073	0.971591	3.05202	1.6146
1.21049	1.14582	1.07271	0.875203	3.47425	1.88432
1.13115	1.15689	1.16746	1.12384		1.73094
0.96248	1.19832	0.985931	1.09678	2.2975	1.48472
1.00323	0.956133	1.03894	1.36958	1.04906	1.32112
1.09407	1.02498	0.975579	1.04116	1.48948	1.67939
1.18406	0.918991	0.911834	1.39088	1.33761	1.18881
1.28567	1.15049	0.862484	1.10896	1.03314	1.70421
1.10117	1.00612	1.10629	1.25138		1.98439
1.20643	0.887021	0.944244	1.23335	0.9876	1.73752
1.13559	1.31749	1.50239	1.18386	2.44455	1.89278
1.19147	1.08442	0.976117	1.22879	3.50448	0.997868
1.13772	1.10699		1.1638	1.23688	1.67489
1.26908	1.06739	1.73922	1.17824	1.74434	0.956276
1.06081	0.982914	0.881037	1.19933	1.42121	1.14471
1.23339	1.25194	1.14182	1.11327	1.72161	1.09857
1.18479	1.41942	1.17185	1.00606	0.946879	1.27239
1.09095	0.968851	1.26914		1.28998
1.09812	0.956709	1.53601	1.25148	3.15894	1.07843
0.933719	1.07453	1.08076	1.20448	2.56093	1.28745
0.959958	0.962901	1.04305	1.02802	0.894782	2.4156
0.927974	1.3904	1.04415	1.20662	2.82937	0.70186
1.40675	1.34495	1.1182	1.03735	2.22158	2.31697
1.21516	1.07057	1.12849	1.22067	1.72011	0.658552
0.945735	1.06207	1.03542	1.03125	0.956381	1.93267
0.963679	0.904725	1.34351	0.948666	3.44773	3.19072
0.972062	1.17472	1.16286	1.18156	1.3088	3.82897
1.10357	1.11781	1.22929	0.966167	2.88719	1.69886
1.02332	0.932576	1.13201	0.877394		1.33395
1.25421	0.909933	1.19171	1.01389	3.39717	2.96848
1.01037	1.22754	1.14591	1.16381	2.32142	0.74216
1.32009	1.32288	0.958165	1.12008	1.68543	1.32464
1.08274	1.1628	1.08956	0.888208	2.77876	2.29329
0.905479	1.03536	1.18015	1.51395	1.30602	1.85296
0.957256	1.53205	1.19054	1.47596	0.897352	1.53703
1.10022	1.04479	1.17525	1.23306	1.78907
0.831794	0.979449	1.47704	1.01564	1.54937	1.51735
1.13801	1.15043	1.53242	1.31061	1.17185	1.5855
1.21766	1.17691	1.0009	1.58426	1.07251	1.40307
1.18126	0.950321	1.29848	0.949113	3.36614	0.815224
1.25021	0.977343	1.59246	1.33971	0.945707	1.63243
1.36725	0.898836	1.01328	1.45322	2.03631	1.90152
1.13715	0.990861	1.54564	1.15225	0.956357	0.942615
1.30552	1.13592	1.14211	1.50541	2.50384	2.65316
1.3008	1.02234	1.29023	1.69481	1.13802	1.18748
1.21558	1.09516	1.38117	1.15814	1.54296	4.49568
1.37471	0.955569	1.36942	1.04782	1.94757	0.811465
1.23031	1.04339	1.02407	0.929129	0.907447	1.20908
1.34925	1.03533	0.977698	1.13555		3.98902
1.23357	0.955082	1.17846	1.23966	1.98578	1.29863
0.874261	1.21405	1.01497	1.18097	0.940533	1.22143
1.23946	1.55312	1.13888	1.28017	1.15948	1.49466
0.973127	1.01182	0.888584	1.00907	1.04726	4.45027
0.896287	0.997498	1.10428	0.983683	2.47957	1.51093
1.16376	1.14326	1.68811	1.20221	2.88172	1.28864
1.07861	0.952648	1.02377	0.858226	1.23784	1.65265
1.01866	0.955037	1.01538	1.04309	0.85315	1.23263
1.07696	0.953358	1.05213	1.11383	1.16568
0.938895	0.987977	1.0767	0.911605	1.10564	1.39719
1.26094	1.03412	1.16742	1.10868	1.02077	0.684476
0.949955	1.11325	1.1946	0.947643	1.13793	1.40593
1.08723	1.04318	0.971249	1.09772	1.09213	1.48219
0.95845	1.11608	0.951027	1.80042	1.28312	0.67516
0.923896	1.10263	1.05495	1.2508	1.31056	1.39221
0.895435	0.974189	1.13104	1.26942	1.39013	1.28489
1.11914	1.00855	0.996108	1.32362	1.8357	1.38641
1.06743	0.926574	1.03233	1.26985	1.25295	2.42095
0.857277	1.09843	1.04536	1.07999	2.29878	1.54266
1.66611	1.16252	1.17912	1.41505	1.1095	1.10722
1.12601	1.25139	1.06016	1.46166	1.1148	3.07955
1.05259	1.1724	1.04431	1.12088	0.892113	1.08601
0.894107	1.02084	1.14082	1.26535	1.41242	1.59668
1.09922	1.00469	1.25717	0.970585	1.39021	1.49949
1.36748	1.04641		1.27725	2.35913	3.58572
0.932112	1.07251		1.03434	1.69414
1.01565	0.997564		1.08336	1.55853
1.22482	1.08759		1.26209	1.72682
1.21184	1.16815		1.23594	1.75331
1.33754	0.875346		1.02893	1.49198
1.0791	1.46411		1.37561	1.76922
1.10388	1.05472		1.12835	1.41793
0.974088	1.17995		1.0013	1.43913
1.00964	1.31364		1.00167	1.32711
1.05788	0.788308		1.20701	1.16104
1.31834	1.02766		1.15898	1.61397
0.97714	1.12064		1.15278	2.14871
1.02513	1.27857		1.15904
1.2328	1.33841	1.00506	1.0303	1.7704
1.03713	0.939954	1.14018	0.993708	1.64806
1.2447	1.22259	1.13827	1.01625	1.53043
1.15863	1.18325	1.16136	1.08575	1.58115
1.10808	1.14296	1.2373	1.38916	1.1523
1.16212	1.21854	1.28947	1.02599	1.80121
1.16996	1.3615	1.19641	1.08673	1.39096
1.15245	0.953893	1.18276	1.19923	1.36096
1.17728	1.02111	1.27513	1.3961	2.76374
1.39862	1.1401	1.29464	1.12794	1.85105
0.974299	0.883506	1.18949	1.21796	1.39537
1.29181	1.13971	1.26167	1.2795	1.43826
1.51422	0.995816	1.34225	1.08174	1.68512
1.27348	1.31629	1.02685	1.15172	1.81024
1.17903	1.15916	1.44765	1.12293	1.68003
1.00585	0.91347	1.40825	1.28885	3.26616
0.870608	0.949306	1.12721	1.14599	2.55154
1.02815	1.2183	1.21516	1.14608	2.08085
0.968795	0.983722	1.07179	1.19413	2.06447
1.07334	1.51128	1.05212	1.02791	1.58435
0.78742	1.07502	1.79916	1.13083	1.81872
0.884668	1.17442	0.857755	1.28306	1.03018
1.45825	0.894377	1.50791	1.2382	1.6027
1.32351	1.27189	1.17045	0.965104	1.92414
1.06499	1.211	1.11106	1.09255	1.7932
1.39689	0.871444	1.2391	0.992085	1.0713
1.28147	1.37627	1.41454	1.32308	2.37121
1.28891	1.71558	1.03577	0.980027	1.495
1.10262	1.14532	0.997953	0.985057	2.08373
1.22549	1.07285		0.817599	1.87792
1.35696	1.02689	0.889388	0.913286	2.0655
1.01256	1.13358	1.50559	1.14397	1.52721
1.15344	1.07776	0.961042	1.17976	1.48971
1.43712	0.884272	0.921405	1.11509	1.87406
0.893862	0.840616	1.10863	1.04221	1.43072
0.934558	0.912663	0.820757	1.03385	1.94492
	0.980674	0.998896	1.01367	1.71872
	1.18557	0.912185	0.898312	0.94456
	1.37088	0.965761	1.32852	1.59369
	1.21453	1.12157	1.14143	1.42007
	0.91992	1.25269	1.07585	1.58862
	0.986121	1.22077	1.06059	1.8031
	0.92352	1.07284	1.14254	1.5641
	0.934185	1.11886	1.22495	1.81001
	1.05547	0.940821	1.11137	1.43099
	0.955765	1.25189	1.11094	1.39367
	1.04152	1.09793	0.974147	1.32424
	1.03238	1.00107	1.29575	1.81597
	1.18222	1.06102	1.09476	1.84459
	1.29463	1.12845	1.48564	1.74224
	1.03633	0.963613	1.18401	1.014
	1.09904	1.11965	0.897231	2.16019
	1.20635	1.20453	1.14727	2.0391
	1.00131	1.6824	1.29899	1.71143
	1.13135	1.04911	1.45029	1.28616
	0.938036	0.955705	1.45836	1.44551
	1.05541	1.21451	1.19973	1.22684
	1.07282	1.13826	1.11323	1.51982
	1.15518	0.987824	1.09324	1.61329
	0.847701	1.14032	1.03073	1.99813
	0.932612	1.01422	1.52066	1.93602
	0.949909	1.52996	1.20459	1.80008
	1.00357	0.788813	1.28116	2.0785
	0.944741	1.00648	1.24527	2.052
	1.10984	1.06432	1.21942	2.10472
	0.963606	1.02327	1.0474	1.48892
	0.861147	1.00339	1.03933	1.76819
	1.21566	1.34891	1.46391	1.65759
	0.975107	1.01108	0.982195	1.50484
	1.27971	0.938322	1.1688	1.35618
	1.06923	0.977395	0.882585	1.46301
	1.3992	0.897517	1.24495	2.08221
	1.36915	0.938285	0.832112	1.74713
	1.24302	0.964546	1.40467	1.44171
	0.745535	0.849123	1.12384	1.87396
	1.08885	1.09311	0.935614	1.86659
	0.904486	0.913435	1.26281	1.24432
	1.26712	1.29506	1.19948	1.23206
	1.00947	1.14466	1.1555	1.53478
	1.0137	1.23182	1.9608	1.67984
	0.968097	1.18704	1.58263	2.53166
	0.837135	1.05099	0.973142	1.638
	0.973803	0.874545	1.32514	1.67551
	0.980695	1.21317	1.25231	1.70155
	1.25553	1.01115	0.982546	1.86097
		0.9728	1.44893	1.29654
		0.979942		1.52842
		1.13584		1.42182
		1.18479		1.35126
		0.984062		1.18668
		1.17218		1.36686
		0.87306		1.25995
		1.06856		1.1268
		1.43261		1.02302
		1.11849		1.32995
		1.1613		1.08803
		1.17968		1.12082
		0.881758		1.43827
		1.13299		2.04527
		1.10956		1.41364
		1.20338	1.37378
		1.28884	1.07473	1.24197
		1.33187	1.05231	1.86149
		1.19259	0.931508	1.16625
		1.1675	1.27762	3.04604
		0.977978	1.35823	1.09163
		1.15706	1.25449	1.12915
		1.0904	1.17091
		1.40138	1.40712	1.46349
		1.09584	1.22954	1.05563
		1.13296	1.24542	2.10807
		1.37395	1.25616	1.13154
		0.961546	1.08538	3.49605
		1.15424	1.48527	1.00566
		1.26919		1.22677
		1.37884	0.972896	0.865966
		1.18666	1.56943	1.59312
		0.873166	1.2388	1.2362
		1.03527	1.85606	1.22663
		1.41133	1.43234	0.935046
		1.05342	1.25976	1.66524
		1.0462	1.14535	2.10601
		1.39578	1.47464	1.80998
		1.00288	1.67294	1.46249
		0.92376	1.34394
		1.31777	1.28687	1.62939
		1.13868	1.25053	1.9621
		1.26935		1.26742
		1.05344		1.47612
		1.25152		1.96767
		1.13004
		1.18559		1.46012
		0.926478		1.54516
		1.23608		2.15664
		1.16754		1.86721
		1.31483		1.12193
		1.19778		1.15884
		1.17743		1.27833
		1.11254		1.49431
		0.988192		2.68889
		1.54655		1.49123
		1.34948		1.26144
		1.13387		1.24735
		0.962521		0.946811
		1.11572		0.99169
		1.33786		1.1361
		1.2506		1.11629
		1.19956		2.13182
		1.55319		0.954714
		1.21373		1.39027
		1.29522		1.25013
		1.82438		0.964492
		1.38105		1.12662
		1.40712		1.52629
		1.12574		1.38387
		1.27054		1.21826
		1.11892		1.44754
		1.15272		1.13146
		1.11665		1.25571
		1.29731		1.81058
		1.46947		1.69855
		1.61482		1.02677
		1.12105		1.53179
		1.58286		1.39861
		1.41776		3.17659
		1.14958		2.79533
		1.0728		1.06869
				1.59901
				1.76055
				1.19533
				1.10192
				1.4299
				1.08815
				1.15347
				1.03388
				1.08762
				1.12672
				0.895232
				1.87988
				2.56517
				2.49604
				1.71712
				3.53693
				2.00993
				1.3886
				1.21552
				1.01246
				1.28928
				1.27618
				2.97716
				1.00684
				1.17397
				1.1059
				1.46961
				1.38132
				0.969305
				2.70856
				2.32076
				1.01998
				1.18061
				1.03779
				1.76062
				1.37448
				1.41533
				1.21817
				1.42104
				1.8937
				1.02591
				1.60156
				1.42619
				1.19759
				1.38058
				1.3654
				1.70494
				1.00793
				1.5322
				1.10065
				1.42412
				1.86318
				2.84667
				1.71453
				1.07739
				2.01233
				1.27382
				1.15762
				0.994653
				1.30635
				1.37876
				0.988704
				1.19325
				3.12899
				1.47297
				1.7459
				1.04502
				1.21318
				1.63304
				1.80152
				1.72571
				1.01882
				2.84396
				1.19108
				1.16317
				0.975598
				1.65074
				1.5252
				2.34566
				1.78722
				1.80206
				2.24753
				1.40766
				3.04595
				1.03209
				1.81871
				2.80179
				2.28794
				2.93549
				1.28068
				1.66152
				1.26237
				2.23572
				1.71557
				2.76764
				1.44268
				1.6911
				1.1157
				2.54209
				1.26019
				1.42048
				1.6861
				2.07168
				2.50823
				1.27647
				2.49309
				3.16933
				3.36066
				1.20489
				2.63581
				1.55435
				1.80155
				1.35921
				1.77859
				1.14596
				2.09235
				2.05207
				1.72959
				2.11336
				1.89052
				2.16318
				3.08071
				0.945031
				1.91396
				2.20056
				1.11417
				1.59292
				1.25202
				1.76246
				2.71116
				2.27302
				1.12395
				1.87895
				1.79913
				2.24941
				2.58541
				3.25975
				1.75421
				2.09505
				1.00124
				1.52303
				2.2145
				1.8609
				2.18031
				1.00915
				3.50398
				1.9445
				1.0899
				0.973584
				1.17641
				2.57049
				0.854545
				1.09668
				1.97896
				0.840173
				2.4718
				1.02851
				1.36656
				2.87734
				0.998737
				1.51731
				0.91989
				1.1496
				0.983689
				1.46409
				1.09549
				1.75903
				2.92715
				1.37136
				1.06644
				0.964623
				1.11152
				1.56099
				2.3851
				2.15483
				1.21092
				3.5301
				1.73479
				2.97828
				1.18115
				1.08477
				2.57574
				1.84049
				2.21252
