# Supplementary material for: VASP-mediated actin dynamics activate and recruit a filopodia myosin
Source: eLife. 2021 May 27;10:e68082. doi: 10.7554/eLife.68082 (PMC8352590; doi:10.7554/eLife.68082)
Supplement: Figure 4—source data 3. [file elife-68082-fig4-data3.xlsx]

## Sheet: vasp- jasp v1 diaCA  
Figure 4E. vasp null: jasp, v1, diaCA ANOVA
Number of families	1
Number of comparisons per family	5
Alpha	0.05
Dunnett's multiple comparisons test	Mean Diff.	95.00% CI of diff.	Significant?	Summary	Adjusted P Value	A-?
GFP-DdMyo7 (i504) - vasp- - no drug vs. GFP-DdMyo7 (i504) - vasp- - 100nm jasp	0.0313	-0.08874 to 0.1513	No	ns	0.9356	B	GFP-DdMyo7 (i504) - vasp- - 100nm jasp
GFP-DdMyo7 (i504) - vasp- - no drug vs. myo7 vasp null + no doxy v1 control	-0.04556	-0.1589 to 0.06774	No	ns	0.7373	C	Column C
GFP-DdMyo7 (i504) - vasp- - no drug vs. myo7 vasp null + doxy v1	-0.0702	-0.1872 to 0.04674	No	ns	0.3933	D	myo7 vasp null + doxy v1
GFP-DdMyo7 (i504) - vasp- - no drug vs. myo7 vasp null + diaWT	-0.5403	-0.6447 to -0.4359	Yes	****	<0.0001	E	myo7 vasp null + diaWT
GFP-DdMyo7 (i504) - vasp- - no drug vs. GFP-DdMyo7- vasp-+diaCA	-0.7013	-0.8475 to -0.5551	Yes	****	<0.0001	F	GFP-DdMyo7- vasp-+diaCA
Test details	Mean 1	Mean 2	Mean Diff.	SE of diff.	n1	n2	q	DF
GFP-DdMyo7 (i504) - vasp- - no drug vs. GFP-DdMyo7 (i504) - vasp- - 100nm jasp	1.114	1.083	0.0313	0.04832	143	192	0.6479	1342
GFP-DdMyo7 (i504) - vasp- - no drug vs. myo7 vasp null + no doxy v1 control	1.114	1.16	-0.04556	0.0456	143	258	0.9992	1342
GFP-DdMyo7 (i504) - vasp- - no drug vs. myo7 vasp null + doxy v1	1.114	1.184	-0.0702	0.04707	143	218	1.491	1342
GFP-DdMyo7 (i504) - vasp- - no drug vs. myo7 vasp null + diaWT	1.114	1.654	-0.5403	0.04202	143	447	12.86	1342
GFP-DdMyo7 (i504) - vasp- - no drug vs. GFP-DdMyo7- vasp-+diaCA	1.114	1.815	-0.7013	0.05886	143	90	11.92	1342
