# Supplementary material for: VASP-mediated actin dynamics activate and recruit a filopodia myosin
Source: eLife. 2021 May 27;10:e68082. doi: 10.7554/eLife.68082 (PMC8352590; doi:10.7554/eLife.68082)
Supplement: Figure 4—source data 4. [file elife-68082-fig4-data4.xlsx]

## Sheet: vasp- jasp V1diaCA Filo
Figure 4F. vasp null: jasp V1 dia CA filopodia counts
GFP-DdMyo7 (i504) in vasp-		GFP-Ddmyo7 in vasp-		GFP-DdMyo7 in vasp-
- no drug	- 100nm jasp	+ no doxy v1 control	+ doxy v1	+diaWT	+diaCA
0	0	0	0	0	3
0	0	0	0	0	0
0	1	0	0	0	0
0	0	0	0	0	0
0	0	0	0	0	0
0	0	0	0	0	0
0	0	0	0	0	0
0	0	0	0	0	0
0	0	0	0	0	0
0	0	0	0	0	0
0	0	0	0	0	0
0	0	0	0	0	2
0	0	0	0	0	4
0	1	0	0	0	2
0	0	0	0	0	2
0	1	0	0	0	2
0	0	0	0	0	1
0	2	0	0	0	1
0	0	0	0	0	2
0	2	0	0	0	2
0	1	0	0	0	6
0	0	0	0	0	1
0	0	0	0	0	2
0	0	0	0	0	1
0	0	0	0	0	3
0	0	0	0	0	0
1	0	0	0	0	0
0	1	0	0	0	0
0	0	0	0	0	0
0	0	0	0	0	0
0	0	0	0	0	0
0	0	0	0	0	0
0	0	0	0	0	0
0	0	0	0	0	0
0	0	0	0	0	0
0	0	0		0	0
1	0	0		0	0
0	0	0		0	0
0	0	0		0	0
0	0	0		0	0
1	0	0		0	0
1	0	0		0	0
0	0	0		0	0
0	0	0		0	4
0	0	0		0	1
0	0	0		0	3
0	1	0		0	1
0	1	0		0	1
0	0	0		0	1
0	0	0		0	1
0	0	0		0	4
0	0	0		0	0
0	0	0		0	0
0	0	0		0	0
0	0	0		0	0
0	0	0		0	0
0	0	0		0	0
0	0	0		0	0
0	1	0		0	0
0	0	0		0	0
0	0	0		0	0
0	1	0		0	0
0	0	0		0	0
0	1	0		0	0
0	0	0		0	0
1	0	0		0	0
0	1	0		0	0
0	0	0		0	0
0	0	0		0	1
0	0	0		0	1
0	0	0		0	0
0	0	0		0	0
0	0	0		0	0
0	0	0		0	0
0	0	0		0	0
0	1	0		0	0
0	0	0		0	0
0	0	0		0	0
0	0	0		0	0
0	0	0		0	0
0	0	0		0	0
0	0	0		0	0
0	0	0		0	0
0	0	0		0	0
1	0	0		0	0
0	0	0		0	2
0	0	0		0	1
0	0	0		0	0
0	0	0		0	0
0	1	0		0	0
0	0	0		0	0
0	0	0		0	0
0	0	0		0	0
0	0	0		0	0
0	0	0		0
0	0	0		0
0	0	0		0
0	1	0		0
0	0	0		0
0	0	0		0
0	0	0		0
0	0	0		0
0	0	0		0
0	0	0		0
0	0	0		0
0	1	0		0
0	0	0		0
0	0	0		0
0	0	0		0
1	0	0		0
0	0	0		0
0	0	0		0
0	0	0		0
0	0	0		0
0	0	0		0
0	0	0		0
0	0	0		0
0	0	0		0
0	0	0		0
0	0	0		0
0	0	0		0
0	0	0		0
1	0	0		0
0	0	0		0
0	0	0		0
0	0	0		0
0	0	0		0
0	0	0		0
0	0	0		0
0	0	0		0
0	0	0		0
0	0	0		0
0	0	0		0
0	0	0		0
0	0	0		0
0	0	0		0
0	0	0		0
0	0	0		0
0	0	0		0
0	2	0		0
0	0	0		0
0	0	0		0
0	0	0		0
	0	0		0
	0	0		0
	0	0		0
	3	0		0
	0	0		0
	2	0		0
	0	0		0
	0	0		0
	0	0		0
	0	0		0
	0	0		0
	0	0		0
	0	0		0
	1	0		0
	0	0		0
	0	0		0
	0	0		0
	0	0		0
	0	0		0
	2	0		0
	0	0		0
	0	0		0
	0	0		0
	0	0		0
	0	0		0
	0	0		0
	0	0		0
	0	0		0
	0	0		0
	0	0		0
	0	0		0
	0	0		0
	5	0		0
	0	0		0
	0	0		0
	0	0		0
	0	0		0
	0	0		0
	0	0		0
	1	0		0
	0	0		0
	1	0		0
	0	0		0
	0	0		0
	0	0		0
	0	0		0
	1	0		0
	0	0		0
	0	0		0
		0		0
		0		0
		0		0
		0		0
		0		0
		0		0
		0		0
		0		0
		0		0
		0		0
		0		0
		0		0
		0		0
		0		0
		0		0
		0		0
		0		0
		0		0
		0		0
		0		0
		0		0
		0		0
		0		0
		0		0
		0		0
		0		0
		0		0
		0		0
		0		0
		0		0
		0		0
		0		0
		0		0
		0		0
		0		0
		0		0
		0		0
		0		0
		0		0
		0		0
		0		0
		0		0
		0		0
		0		0
		0		0
		0		0
		0		0
		0		0
		0		0
		0		0
		0		0
		0		0
		0		0
		0		0
		0		0
		0		0
		0		0
		0		0
		0		0
		0		0
		0		0
		0		0
		0		0
		0		0
		0		0
		0		0
		0		0
		0		0
		0		0
		0		0
		0		0
		0		0
		0		0
		0		0
		0		0
		0		0
		0		0
		0		0
		0		0
		0		0
		0		0
		0		0
		0		0
				0
				0
				0
				0
				0
				0
				0
				0
				0
				0
				0
				0
				0
				0
				0
				0
				0
				0
				0
				0
				0
				0
				0
				0
				0
				0
				1
				0
				0
				0
				0
				0
				0
				0
				0
				0
				0
				0
				0
				0
				0
				0
				0
				0
				0
				0
				0
				0
				0
				0
				0
				0
				0
				0
				0
				0
				0
				0
				0
				0
				0
				0
				0
				0
				0
				0
				0
				0
				0
				0
				0
				0
				0
				0
				0
				0
				0
				0
				0
				0
				0
				0
				0
				0
				0
				0
				0
				0
				0
				0
				0
				0
				0
				0
				0
				0
				0
				0
				0
				0
				0
				0
				0
				0
				0
				0
				0
				0
				0
				0
				0
				0
				0
				0
				0
				0
				0
				0
				0
				0
				0
				0
				0
				0
				0
				0
				0
				0
				0
				0
				0
				0
				0
				0
				0
				0
				0
				0
				0
				0
				0
				0
				0
				0
				0
				0
				0
				0
				0
				0
				0
				0
				0
				0
				0
				0
				0
				0
				0
				0
				0
				0
				0
				0
				0
				0
				0
				0
				0
				0
				0
				0
				0
				0
				0
				0
				0
				0
				0
				0
				0
				0
				0
				0
				0
				0
				0
				0
				0
				0
				0
				0
				0
				0
				0
				0
				0
				0
				0
				0
