# Supplementary material for: VASP-mediated actin dynamics activate and recruit a filopodia myosin
Source: eLife. 2021 May 27;10:e68082. doi: 10.7554/eLife.68082 (PMC8352590; doi:10.7554/eLife.68082)
Supplement: Figure 4—source data 5. [file elife-68082-fig4-data5.xlsx]

## Sheet: vasp- jasp v1 dia CA
Figure 4F. vasp null: jasp V1 dia CA filo Anova
Number of families	1
Number of comparisons per family	5
Alpha	0.05
Dunnett's multiple comparisons test	Mean Diff.	95.00% CI of diff.	Significant?	Summary	Adjusted P Value	A-?
GFP-DdMyo7 (i504) - vasp- - no drug vs. GFP-DdMyo7 (i504) - vasp- - 100nm jasp	-0.1368	-0.2487 to -0.02481	Yes	**	0.0099	B	GFP-DdMyo7 (i504) - vasp- - 100nm jasp
GFP-DdMyo7 (i504) - vasp- - no drug vs. Column C	0.05594	-0.04855 to 0.1604	No	ns	0.522	C	Column C
GFP-DdMyo7 (i504) - vasp- - no drug vs. myo7 vasp null + doxy v1	0.05594	-0.1352 to 0.2471	No	ns	0.9143	D	myo7 vasp null + doxy v1
GFP-DdMyo7 (i504) - vasp- - no drug vs. GFP-DdMyo7- vasp-+diaWT	0.05384	-0.04283 to 0.1505	No	ns	0.4844	E	GFP-DdMyo7- vasp-+diaWT
GFP-DdMyo7 (i504) - vasp- - no drug vs. GFP-DdMyo7- vasp-+diaCA	-0.5292	-0.6637 to -0.3946	Yes	****	<0.0001	F	GFP-DdMyo7- vasp-+diaCA
Test details	Mean 1	Mean 2	Mean Diff.	SE of diff.	n1	n2	q	DF
GFP-DdMyo7 (i504) - vasp- - no drug vs. GFP-DdMyo7 (i504) - vasp- - 100nm jasp	0.05594	0.1927	-0.1368	0.04463	143	192	3.064	1208
GFP-DdMyo7 (i504) - vasp- - no drug vs. Column C	0.05594	0	0.05594	0.04166	143	275	1.343	1208
GFP-DdMyo7 (i504) - vasp- - no drug vs. myo7 vasp null + doxy v1	0.05594	0	0.05594	0.0762	143	35	0.7341	1208
GFP-DdMyo7 (i504) - vasp- - no drug vs. GFP-DdMyo7- vasp-+diaWT	0.05594	0.002105	0.05384	0.03854	143	475	1.397	1208
GFP-DdMyo7 (i504) - vasp- - no drug vs. GFP-DdMyo7- vasp-+diaCA	0.05594	0.5851	-0.5292	0.05365	143	94	9.862	1208
