# Supplementary material for: VASP-mediated actin dynamics activate and recruit a filopodia myosin
Source: eLife. 2021 May 27;10:e68082. doi: 10.7554/eLife.68082 (PMC8352590; doi:10.7554/eLife.68082)
Supplement: Figure 5—source data 1. [file elife-68082-fig5-data1.xlsx]

## Sheet: VASP-tet-FAB cortex
Figure 5. VASP-tet-FAB cortex
vasp-	vasp-dTET	vasp-4M	vasp-fab
0.954175	1.00638	2.48708	0.990766
0.952487	1.44756	0.933562	1.83314
1.30515			1.76772
0.854803	1.49127	1.2278	1.11555
0.861874	1.00655	0.839243	0.999364
1.30603	1.33093	0.995578	1.32704
1.13507	0.998291	2.39494	1.66895
1.29514	0.948718	2.44905	1.24708
0.960195	0.913588	1.06487	0.967507
0.897528	0.877639	1.41645	1.29874
0.930651	0.959498	2.46735	1.11215
1.04002	1.34917		1.54459
0.99505	1.10324	1.32482	0.819568
0.970741	1.05214	1.16358	1.08786
1.0215	1.01077	1.27371	1.04404
0.931645	0.945596	1.24002	1.11069
1.07716	1.41978	1.11801	0.95264
1.01052		2.75856	1.37403
1.04872	1.07461	1.88882	1.48502
0.983962	1.58296	1.01029	1.23219
1.34384	1.85018	2.21319	1.14915
1.00059	1.98839	2.33778	0.928076
0.982634	1.25032	1.1712	1.33054
0.924316	1.69285	1.29666	0.922654
1.14952	1.37488	1.45129	0.989856
1.04884	0.848162	1.06868	1.07533
0.935571	0.895192	1.33223	1.16703
0.979578	1.06459	1.20159	0.947059
0.838115	0.909282	1.09811	1.28289
0.79711	0.893705	1.54834	0.991616
1.28285	1.1661	1.51785	1.25539
1.0697	0.94685	1.20779	1.57474
0.971171	1.30517	1.51605	1.02326
0.958276	1.02075	1.0605	0.999748
1.08527	1.69645		1.67018
0.917548	0.886501	1.23896	1.49782
1.19625	0.885687	1.43921	1.09912
1.21933	1.04785	0.963033	1.07017
0.942906	1.25565	1.46823	1.37404
0.949452	1.21829	1.10689	0.834642
0.997955	0.84344	1.36509	1.63312
0.811288	1.24311	0.907559	1.53186
1.04639	1.2744	1.00362	0.970432
0.998126	1.18315	1.41775	1.13477
0.818023	1.7567	1.41357	1.12637
1.08817	1.09047		0.937806
1.35793	1.42306	1.0159	1.14262
0.950237	1.18998	1.81294	1.1548
1.19019	1.47482	2.23297	0.846301
0.900617	1.01256	1.4265	1.21142
0.900004	1.0079	1.37401	1.15511
1.08294	1.06381	1.27086	1.03565
1.07854	1.27066	1.09374	1.13665
0.917318	1.01228	1.50025	1.73977
1.04876	1.2174	2.03355	1.91198
1.12105	0.970947	0.992534	1.12782
0.992899		1.75024	1.02061
0.939071	1.43421	2.6814	1.19271
1.06871	1.03268	1.36798	1.33318
0.874743	1.23597	1.37111	1.08907
0.879069	1.12415	1.17721	1.25292
0.962104	1.34021	1.29234	1.29478
1.14355	1.27625	2.2076	0.979777
1.05827	1.1728	1.35671	0.878594
1.33849	1.53283	1.27982	1.45294
1.3431	1.11599	1.13778	1.03531
0.92639	2.05121	1.16002	1.33088
1.3877	1.01951	2.12313	1.53593
1.00819	1.02003		1.1733
1.02	0.89356	1.0265	1.33022
1.07393	1.33242	1.85003	1.16922
0.917731	1.27587	1.86478	1.03043
0.939668	1.14963	2.03507	1.30307
1.1989	0.946097	1.10379	1.1184
		1.40616	1.10214
1.32369	0.993362	1.34884	1.19013
1.19222	1.00721	1.47945	1.10157
1.2451	0.872243	2.01785	1.1538
1.08296	1.34585	1.17042	1.4283
1.00972	1.52354	1.36416	1.00797
1.04473	1.86541	1.26653	1.15447
1.10716	1.24361	1.25086	1.26673
1.2428	1.27873		1.60905
1.01393	1.59838		1.12117
1.11401	1.51378		1.42169
1.05503	1.17881		1.04819
0.873651			1.09603
1.19436	1.16372		1.37174
0.87499	1.26319		1.0198
1.00953	1.16258		1.24762
1.10316	1.14065		1.08079
1.32191	1.16701		0.995629
0.963122	1.23819		1.1142
1.22755	1.06299		1.26172
0.931965	0.900301		1.16179
0.891595	1.48475		1.10498
1.01536	1.51215		1.03087
1.19303	0.924854		1.05696
1.2037	1.01957		0.867012
1.191	1.16707		0.960177
0.965782	1.27193		0.994364
0.952997	1.06277		0.836185
1.05943	1.26262		0.890292
1.20608	1.23254		1.48212
0.93663	2.04573		1.2975
1.04834	1.21348		1.28805
0.987286	1.01657		1.06632
1.32785	1.89247		1.31082
1.08677	1.38661		1.56085
1.18553	1.25337		1.24575
1.11134	1.36137		1.67348
0.895502	1.66992		0.948341
1.33841	1.01249		1.44914
0.92218	1.13712		0.902199
1.0357	1.03655		1.00624
1.02679	1.3242		1.41791
0.905801	0.979813		1.55623
1.29066	1.03524		1.1502
1.11377			0.977956
	1.16186		0.855736
1.12713	1.06722		0.82546
0.949696	1.17535		0.905702
1.13438	1.2072		0.860883
1.16156	1.15405		0.950425
0.997012	0.935931		0.951184
0.97647	1.18741		1.21695
1.191	0.89885		1.08391
1.12123	1.05008		1.14447
1.25505	0.95929		0.962053
1.072	1.04402		0.935375
0.940846	0.967971		1.14754
1.28432			0.947052
0.905834			0.861215
0.978324			0.959565
0.972664			0.80862
0.995418			0.934892
1.07771			0.999887
1.58253			0.969608
1.10932			1.27578
1.19902			1.04783
1.23973			0.938286
0.89543			0.887506
1.38359			1.31383
0.91887			1.23675
0.836501			1.17559
1.17634			1.4978
1.22755			1.28232
1.0654			1.10914
1.03917			1.6227
1.52674			1.46371
1.35839			1.25046
0.962578			1.00377
1.28277			0.86621
1.26076			1.92008
0.798209			1.10715
0.814397			1.08136
1.00043			0.952462
0.76387			1.11173
0.927412			1.11323
0.958069			1.26629
0.932863			1.23832
1.08427			1.26809
1.04497			1.01053
0.995325			1.85313
1.03277			1.49985
0.852048			1.10199
1.15063			1.83458
1.41676			1.16069
0.807365			1.07858
1.3526			1.22076
0.955694			1.3991
			1.13661
0.883373			1.24735
0.979804			1.04981
0.973224			1.00818
1.34119			1.21924
1.17828			1.3439
1.25779			1.01345
0.871019			1.26723
0.978705			1.14902
1.20023			1.15253
0.904945			1.49463
1.29319			1.06193
1.01413			1.09682
0.969694			1.33541
			1.40556
			1.2482
			0.99894
			1.44417
			1.30807
			1.03864
			1.49762
			1.13032
			1.76067
			1.21556
			1.16272
			1.27365
			1.14932
			1.0118
			1.284
			0.992776
			1.12589
			0.876691
			1.0313
			1.2821
			1.13705
			1.13053
			1.35154
			0.976013
			1.06596
			0.992062
			1.27942
			0.78846
			1.22681
			1.50521
			1.14053
			1.49491
			1.52679
			1.10721
			1.29417
			1.03662
			1.44479
			1.36113
			1.33381
			1.09018
			1.17064
			1.48835
			1.23212
			1.7325
			1.32004
			1.4417
			1.4822
			1.07497
			0.924275
			1.53185
			1.26839
			1.29235
			1.37639
			1.31675
			0.962463
			1.20223
			1.28148
			1.03815
			1.15286
			1.06105
			1.02333
			1.19538
			0.922613
			1.02546
			0.958496
			1.34268
			0.981083
			1.10282
			0.947841
			1.23555
			1.0875
			1.26512
			1.61512
			1.19998
			1.45314
			1.36037
			1.27016
			0.92235
			1.12978
			1.24053
			1.61565
			1.51439
			1.23514
			1.04442
			1.10775
			1.20153
			1.08121
			1.1877
			1.32587
			1.56054
			1.0788
			0.990348
			1.14194
			1.17138
			1.11332
			1.16963
			0.998518
			1.16794
			1.18058
			1.06524
			1.32595
			0.849584
			1.05496
			0.813946
			0.881195
			1.31548
			1.41101
			1.086
			0.972483
			0.970887
			1.273
			1.06466
			1.35198
			1.44315
			1.03279
			1.59613
			0.985724
			1.44221
			1.01734
			1.0153
			1.32946
			1.15527
			1.20388
			1.5127
			1.35155
			1.18656
			1.3393
			1.24785
			1.61782
			1.32192
			0.885527
			1.04273
			0.899342
			1.07412
			0.846506
			1.26248
