# Supplementary material for: VASP-mediated actin dynamics activate and recruit a filopodia myosin
Source: eLife. 2021 May 27;10:e68082. doi: 10.7554/eLife.68082 (PMC8352590; doi:10.7554/eLife.68082)
Supplement: Figure 5—source data 2. [file elife-68082-fig5-data2.xlsx]

## Sheet: VASP-tet-FAB ANOVA
Figure 5 VASP-tet-FAB-cortex ANOVA
Number of families	1
Number of comparisons per family	3
Alpha	0.05
Dunnett's multiple comparisons test	Mean Diff.	95.00% CI of diff.	Significant?	Summary	Adjusted P Value	C-?
vasp-4M vs. vasp-	0.4088	0.3290 to 0.4885	Yes	****	<0.0001	A	vasp-
vasp-4M vs. vasp-dTET	0.268	0.1830 to 0.3529	Yes	****	<0.0001	B	vasp-dTET
vasp-4M vs. vasp-fab	0.281	0.2066 to 0.3554	Yes	****	<0.0001	D	vasp-fab
Test details	Mean 1	Mean 2	Mean Diff.	SE of diff.	n1	n2	q	DF
vasp-4M vs. vasp-	1.471	1.062	0.4088	0.03468	77	182	11.79	701
vasp-4M vs. vasp-dTET	1.471	1.203	0.268	0.03695	77	125	7.252	701
vasp-4M vs. vasp-fab	1.471	1.19	0.281	0.03237	77	321	8.682	701
