# Supplementary material for: VASP-mediated actin dynamics activate and recruit a filopodia myosin
Source: eLife. 2021 May 27;10:e68082. doi: 10.7554/eLife.68082 (PMC8352590; doi:10.7554/eLife.68082)
Supplement: Figure 5—source data 3. [file elife-68082-fig5-data3.xlsx]

## Sheet: VASP-tet-FAB filos
Figure 5 VASP-tet-FAB filopodia
vasp-	vasp-dTET	vasp-4M	vasp-fab
0	2	6	0
0	0	1	0
0	7	5	0
0	10	1	0
0	7	0	0
0	0	1	0
0	4	7	0
0	2	0	0
0	1	0	0
0	2	1	0
0	1	5	0
0	5	2	1
0	0	0	0
0	2	0	0
1	8	4	0
0	0	2	0
0	0	5	1
0	0	5	0
1	2	0	0
0	7	1	1
0	4	3	0
0	0	1	0
0	11	5	0
0	4	1	1
0	1	2	0
0	9	0	0
0	2	0	0
0	12	0	0
0	0	0	0
0	5	1	0
0	0	0	0
0	7	1	1
0	5	6	1
0	0	0	0
0	7	7	0
0	1	2	0
0	1	0	0
0	16	0	0
0	2	1	0
0	0	4	0
0	0	0	1
0	0	0	0
0	0	0	0
0	0	2	0
0	2	3	0
0	0	0	0
0	0	1	0
0	0	1	0
0	0	2	2
0	0	1	0
0	0	3	0
0	0	1	1
0	1	0	2
0	0	1	0
0	0	2	0
0	0	0	0
0	0	2	0
1	0	3	0
0	0	1	0
0	0	1	0
0	0	0	0
0	0	5	0
0	0	3	0
0	0	0	0
1	1	4	0
0	1	1	0
0	1	0	0
0	0	5	0
0	3	9	0
0	1	11	2
0	0	6	0
3	0	3	0
0	0	6	0
0	0	3	0
0	1	2	0
0	0	0	0
0	0	2	0
1	0	2	0
0	0	2	0
0	0	4	1
0	0	0	0
0	0		2
0	0		0
0	0		0
0	2		0
0	3		0
0	1		0
0	0		0
0	0		0
0	0		0
0	0		0
0	0		0
0	0		0
0	1		0
0	0		0
0	0		0
0	0		0
0	0		0
0	0		0
0	1		0
0	0		0
0	0		0
1	0		1
0	0		0
0	0		2
1	0		1
0	0		0
0	0		0
0	0		0
0	0		1
0	0		3
0	0		0
0	1		2
0	0		0
0	0		0
0	0		0
0	0		0
0	0		0
	0		0
	4		0
	0		0
	0		0
	0		0
	0		0
	0		0
	0		0
	2		0
	1		0
	0		0
	0		0
	0		0
			0
			0
			0
			0
			0
			0
			0
			1
			0
			0
			0
			0
			0
			0
			0
			0
			0
			0
			0
			0
			1
			0
			0
			0
			0
			0
			0
			0
			0
			0
			0
			0
			0
			0
			0
			1
			0
			0
			0
			0
			0
			2
			0
			0
			0
			0
			0
			0
			0
			0
			0
			0
			0
			2
			1
			0
			0
			0
			0
			0
			0
			0
			0
			0
			0
			0
			0
			0
			0
			0
			0
			0
			0
			0
			0
			0
			3
			1
			2
			1
			0
			0
			0
			0
			0
			0
			0
			0
			0
			0
			0
			1
			0
			0
			0
			0
			0
			0
			1
			0
			0
			0
			0
			0
			0
			0
			0
			0
			0
			0
			0
			0
			0
			0
			0
			0
			0
			0
			0
			0
			1
			0
			0
			0
			0
			0
			0
			0
			0
			0
			1
			1
			0
			0
			0
			0
			0
			0
			0
			0
			0
			0
			0
			0
			1
			0
			1
			0
			1
			1
			0
			0
			0
			0
			0
			0
			0
			0
			0
			0
			1
			0
			0
			0
			0
			0
			0
			0
			2
			0
			0
			0
			0
			0
			0
			0
			0
			0
			0
			0
			0
			0
			2
			0
			3
			1
			0
			0
			1
			0
			0
