# Supplementary material for: VASP-mediated actin dynamics activate and recruit a filopodia myosin
Source: eLife. 2021 May 27;10:e68082. doi: 10.7554/eLife.68082 (PMC8352590; doi:10.7554/eLife.68082)
Supplement: Figure 5—source data 4. [file elife-68082-fig5-data4.xlsx]

## Sheet: VASP-tet-FAB-filo ANOVA
Figure 5. VASP-tet-FAB-filopodia ANOVA
Number of families	1
Number of comparisons per family	3
Alpha	0.05
Dunnett's multiple comparisons test	Mean Diff.	95.00% CI of diff.	Significant?	Summary	Adjusted P Value	A-?
vasp- vs. vasp-dTET	-1.243	-1.703 to -0.7841	Yes	****	<0.0001	B	vasp-dTET
vasp- vs. vasp-4M	-2.039	-2.561 to -1.516	Yes	****	<0.0001	C	vasp-4M
vasp- vs. vasp-fab	-0.1047	-0.4942 to 0.2848	No	ns	0.8555	D	vasp-fab
Test details	Mean 1	Mean 2	Mean Diff.	SE of diff.	n1	n2	q	DF
vasp- vs. vasp-dTET	0.08475	1.328	-1.243	0.1959	118	131	6.347	648
vasp- vs. vasp-4M	0.08475	2.123	-2.039	0.2227	118	81	9.153	648
vasp- vs. vasp-fab	0.08475	0.1894	-0.1047	0.1661	118	322	0.6302	648
