# Supplementary material for: VASP-mediated actin dynamics activate and recruit a filopodia myosin
Source: eLife. 2021 May 27;10:e68082. doi: 10.7554/eLife.68082 (PMC8352590; doi:10.7554/eLife.68082)
Supplement: Figure 6—source data 1. [file elife-68082-fig6-data1.xlsx]

## Sheet:  M7 activd _tail vasp- cortex
Figure 6. Activated-Myo7, tail in vasp- Cortex
GFP-DdMyo7-ax2 control	GFP-DdMyo7-CAAX in Ax2 control	GFP-DdMyo7-Tail ini Ax2 control	GFP-DdMyo7-KKAA in Ax2 control	GFP-DdMyo7 in vasp-	GFP-DdMyo7-CAAX in vasp-	GFP-DdMyo7-Tail in vasp-	GFP-DdMyo7-KKAA in vasp-
1.15708	1.19231	1.08463	2.73447	1.15676	0.846928	1.20998	1.83848
2.2386	1.02581	1.55027	1.38393	0.867112	1.11716	1.03264	0.850413
1.08124	1.96767	1.07658	1.14784	1.04632	1.01964	1.4418	1.48415
1.03147	1.85469	1.15845	1.57436	0.953206	1.02956	1.34074	1.14427
1.1444	2.20104	1.42069	1.23111	1.37405	0.912719	1.62315	1.42362
1.27564	1.8934	1.60186	1.13811	1.4415	0.995505	1.34594
1.18085	1.52718	1.4278	1.9833	0.917431	1.45488	1.304	1.02217
1.30198		0.980429	2.13966	0.883295	1.00513	1.45521	1.4529
1.20888	2.06081	2.36286	1.06489	0.98494	1.06894	1.30078	1.02533
1.60355	1.67181	1.23081		0.95513	0.866533	1.25891	1.07317
1.35087	1.07713	1.43795	1.40417	0.941544	1.30596	1.52739	1.36882
1.19751		1.15648	1.16338	0.939505	1.13862	1.41557	1.18675
1.1107	0.983418	1.77146	3.3277	0.975588	0.903936	1.28104	1.19982
1.14749	1.17258	1.17031	2.04082	0.886724	0.986645	1.37476	0.964431
1.22701	1.28806	1.72225	1.75276	0.879594	1.08854	1.26432	1.10425
0.997015	1.36694	1.27392	2.56913	0.81396	1.43981	1.59567	1.20324
1.06749	1.34249	1.97481	1.62071	0.79025	1.02191	1.17933	1.72694
1.0209	1.13252	1.17109	1.19988	1.24618	1.18516	1.78769	2.08165
1.32046	1.07754	1.10983	2.09692	0.943424	1.0224	1.52377	1.20319
1.13887	0.962411	1.16634	1.60992	1.49141	1.2296	1.15744	1.35526
1.37068	1.44809	1.18422	1.17723	0.880529	1.02225	1.10006	1.35977
1.16319	1.24237	1.17749	1.54122	0.930652	1.17259	0.972031	1.23416
1.18976	0.813897	1.21244	1.96864	0.99531	0.932471	1.33773	1.02802
1.26242	1.15011	1.53794	2.17408	1.09133	1.0146	1.44012	0.875015
1.18521	2.3686	1.27673	2.44222	0.866291	1.05392	1.57635	0.886906
1.54868	1.25569	1.69325	3.22808	0.808656	1.16633	1.24427	1.22082
1.04367	1.75305	1.5004	2.3148	1.15376	1.30666	1.43802	0.972619
1.03479	1.07108	1.01185	3.0915	0.898239	1.09775	1.11958	1.27123
1.19549		1.25181	1.8459	1.13291	1.07021	1.04884	1.41839
1.06694	1.21892	1.24196	1.28921	1.17866	1.47314	1.20207	1.13078
1.34	1.13583	1.25065	1.00585	1.30566	1.33036	1.15639	1.2985
0.98099	1.03051	1.68385	1.0671	0.92711	1.06634	1.1043	1.70421
1.13043		2.02156	2.21784	0.870133	1.7122	1.30248	1.6979
1.07287	1.31941	1.05177	2.34053	0.898397	1.00299	1.36958	1.65039
1.10472	0.928385	1.24726	3.24538	0.985306	0.920217	1.32153	1.32911
1.02236	1.17411	1.22247	1.23724	0.942322	1.25216	1.16282	1.3904
0.85096	1.17317	1.35213	3.07598	0.904993	1.79917	1.59196	1.43672
0.990911	0.930465	1.51576		1.05538	1.16871	1.29137	1.08954
1.03764	1.47461			0.923487	1.18678	1.29125	1.66483
1.08224	1.16705	1.66997	2.36376	0.776085	1.80787	1.05621	1.25412
	1.05492	0.943535	1.67882	1.20001	0.974695	1.19717	1.30193
1.60174	1.06512	2.34334	2.40212	1.56939	1.15507	1.43836	1.04129
1.15987	1.03723	1.47678	1.54241	1.02097	1.16054	1.2752	1.49779
1.324	0.989254	1.15189	1.61292	1.10656	1.21314	1.04121	1.1158
1.40562	1.81788	1.81168	2.23473	1.14869	1.22942	1.08299	1.68101
1.24959	1.1508	1.43846	1.2287	1.04427	0.975799	1.24708	1.14134
1.67005	1.5446	1.11776	1.33421	1.48078	0.944633	0.95292	1.0218
0.972651	1.0025	1.19156	3.3326	1.05583	1.37371	1.49917	1.46678
1.38371	1.01812	1.60835	2.7676	1.17577	1.15775	1.1401	1.4591
1.31257	1.80269	1.11758	3.32402	0.939491	1.03087	1.63076	1.17579
1.54318	0.866655	1.78236	2.08066	1.06323	1.43202	1.22327	1.1768
1.08624		1.40598	1.61829	0.986632	1.69714	0.980945	1.25388
0.961028	1.8469	1.18903	1.4178	0.859399	1.03184	1.13266	1.81493
1.78569	1.15275	1.34752	2.19652	0.841078	1.54758	1.07411	1.20773
1.11815	1.43806	0.955022	2.90908	0.943259	1.69151	1.17095	0.941647
0.969185	1.35935	1.39388	1.2128	0.893233	1.10619	1.25672	1.11661
1.10731	1.00067	1.51819	1.04989	1.09415	1.56112	1.24114	1.28929
1.74812	1.27757	1.22405		0.956225	1.14936	1.5101	0.987547
1.28592	1.11503	1.6823	2.44504	0.860319	1.30203	1.23826	1.69004
2.01322	0.955058	1.68188	0.83171	0.852052	1.35613	1.42185	1.39777
1.8291	0.901988	1.03447	1.57819	0.865917	1.39212	0.962946	2.37203
1.28165	0.882405	1.36199	3.12868	0.844377	1.16086	1.21185	1.5842
1.35081	1.19252	1.49837	2.58881	0.922736	1.20572	1.32615	1.39618
1.17272	1.09677	1.33173	1.04425	0.866228	1.39415	1.04882	1.05674
1.16463	1.48422	1.27209	1.49571	1.04567	1.38441	1.06202	1.26886
1.08869		1.29123	2.83094	0.869115	1.43171	1.18141	1.01312
1.51902	1.43491	1.39695	3.47871	0.849966	1.26477	1.36269	0.956295
1.28719	1.33444	1.92966	1.95251	0.952653	1.24476	1.21959	1.86323
1.15333	1.62581	1.45967	1.19393	1.03812	1.17007	1.34878	1.29842
1.56437	1.42589	1.21215	1.19942	0.859288	1.2754	1.5757	1.39178
1.4267	1.18557	1.17317		1.029	1.15978	1.02123	1.49363
1.47499	1.48246	1.42329	3.34856	0.888415	1.50348	1.40282	1.56007
1.28504	1.14622	1.44152	1.36225	0.987546	1.19496	1.22367	1.86655
1.47584	1.54504	1.5266	3.40376	1.61703	1.5278	1.29105	1.20421
1.61383	1.41533	1.09274	2.21005	0.908505	1.58527	1.66298	1.32139
1.71127	1.16132	1.30489	1.85232	0.985833	1.06303	1.44869	1.06187
1.40257	1.13888	1.34038		1.03319	1.41905	1.08458	1.47816
1.44699	1.06139	1.3453	1.79367	1.42501	1.29186		1.38551
1.21209	0.944312	1.45955	1.02422	1.05635	1.01434	1.28207	1.26465
1.27697	1.0139	1.5191	1.90994	1.23618	1.02612	2.07887	1.79672
1.65792	1.19465	1.78392	1.33463	1.27056	0.923716	1.15775	0.954548
2.27119	1.88363	1.06085	0.989134	1.11689	1.0331	0.920475	1.28343
1.74598	1.19537	1.46027	2.09079	1.12547	1.20414	1.42106	0.945734
1.12095	1.29849	1.71404	1.52962	1.01233		1.59299	1.3353
1.50109	1.24463	1.32354	1.75001	1.2691	1.02328	1.36077	1.16353
2.13057		1.70509	1.11323	1.10291	1.27177	1.37776	1.07755
1.50285	1.32097	1.8203		0.823637	1.49539	1.18057	0.872271
2.07981	1.34764	1.15805	0.97311	0.959217	1.78354	1.35206	1.15744
1.2939	1.36476	1.04212	1.59102	1.19564	0.980163	1.36568	1.04892
1.52058	1.36291	1.04174	0.991732	1.03769	0.965741	1.07063	0.91132
1.27875	1.04326	1.55745	1.13428	1.14114	1.28859	1.08939	1.53473
1.63414	1.79339	1.48361	1.06079	1.27477	0.9663	1.27636	1.05494
1.45549	1.06535	1.25531	3.20121	1.1842	1.27248	1.43327	1.65083
1.53309		1.48286	1.01347	1.1253	1.17014	1.72011	1.1636
1.20068	1.17174	1.50353	2.9473	1.58655	1.08369	1.35083	1.27914
1.26024		1.55413	0.971896	1.45417	1.29779	1.1508	1.53776
1.38715		1.31295	1.04076	0.93053	0.975243	1.31061	1.19226
1.44997		1.77809	1.1596	1.17801	1.28515	1.05863	1.21594
1.64422	0.90607	1.76125	1.62888	1.12481	1.33932	1.61006
1.33431	1.45893	1.33547	2.43173	1.21308	1.11654	1.03701	1.15447
1.62261	1.24147	2.18408	1.6247	1.00554	1.46016	1.47639	1.90392
1.36256	1.13279	1.8439	2.32152	1.12149	1.45716	1.2007	1.17268
1.28539	1.53452	1.43703	1.80724	0.970623	1.37121	1.26818	1.30236
1.66816	1.38695	1.2879	1.71423	1.41702	1.14563	1.45494	1.717
1.3923	1.37981	1.40876	1.00591	0.967258	1.59093	1.21211	1.06119
1.34829	1.18688	1.1404	1.20738	1.49176	1.02424	1.26444	1.38288
2.10521	1.29918	1.38312	3.02713	1.17082	1.27342	1.08703	1.22217
1.41184	2.37471	1.07492	2.12067	1.58075	1.09739	0.905519	1.25728
1.12778	1.02226	1.24762	3.10126	1.19348	1.24409	0.942231	1.566
1.11642	1.23139	1.31904	2.03508	1.16138	1.09856	1.405	1.27919
1.15697	1.71531	1.11079	1.06145	1.13356	0.935372	1.64693	1.32783
1.52713	0.935299	0.987587	0.984499	1.205	1.67524	1.41883	1.09837
	1.31872	1.19326	1.0397	1.18017	1.2582	1.0551	1.58099
1.37672	0.918653	1.59166	1.44081	1.26392	1.23322	1.0986	1.44018
1.37586	1.08406	1.65588	0.890174	1.18783	1.38467	1.35893	1.53483
1.19429	0.87707	1.29289	1.28997	1.62107	1.11715	1.45074	1.01064
1.51608	1.11768	1.17927	1.30535	1.3452	1.1297	1.40773	1.09342
1.15404	0.965353	0.902021	1.04438	1.30126	1.46191	1.7205	1.15258
1.21295	1.21418	1.019	1.12195	1.1072	0.994866	1.39556	1.42776
1.41235	1.2527	0.936866	1.08211	1.27268	1.60614	1.21228	1.3194
1.15405	1.20359	0.834507	1.12453	0.984239	1.06974	1.49153	1.74296
1.1785	1.12244	1.27251	1.47544	1.10918	1.3503	1.79512	1.39152
1.71608	1.08748	1.03236	1.18525	1.07048	1.35443	1.30203	1.29719
1.41101	0.974289	1.365	1.00028	0.846726	1.2345	1.44828	1.30374
1.34794		1.16213	1.11388	1.0099	1.02962	1.71321	1.22816
1.5354	1.45579	1.14876	0.997682	0.890623	1.17928	1.46898	1.17829
1.12719	1.28641	0.944986	1.96586	1.06484	1.12094	0.935035	1.0156
1.8698	1.84378	1.77996	1.50425	0.955108	1.24463	1.89563	1.20213
1.60872	1.98949	1.66132	1.06636	0.849368	1.1053	1.32072	1.29161
1.39213	1.77502	1.07312	1.57268	0.995251	1.33278	1.3095	1.16251
1.91146	1.38605	0.830472	1.11828	1.22468	1.03063	0.908003	1.2639
1.05808	1.53242	2.0617	1.1427	1.07958	1.16491	1.06994	1.92912
1.12411	0.92175	2.40743	1.69661	1.11132	0.853791	0.934576
1.13438	1.55848	1.28999	1.58224	1.09852	1.04673	1.17094	2.06208
1.17074	1.21597	2.35687	1.11946	0.824266	1.20816	1.33862	1.97849
2.27454	1.1069	1.49048	1.01731	1.24992	1.01891	1.2614	2.23528
1.49872	1.11219	1.27772	2.58157	1.11858	1.75066	1.27781	2.20478
1.35804	1.43993	1.6641	0.84159	0.924525	1.02992	1.01238	2.07378
1.34575	1.43552	1.02233	1.7415	0.99348	1.08674	0.991927
1.6427	0.88132	1.07936	1.99933	1.0536	1.1158	1.34136	1.87406
1.229	1.38851	1.44634	1.62281	1.08175	1.27259	1.30254	1.78072
1.19619	1.45324	0.981004	1.47079	1.34333	1.3494	1.95132	1.07696
1.20356	1.12787	1.28481	1.05482	0.942601	1.64049	1.27315	2.2623
1.16896	1.1732	1.45964	1.39242	0.944637	1.28111	1.6596	1.89108
1.27789	0.996349	1.5367	0.927921	1.00316	1.38091	1.21464	1.03364
1.33727	1.15296	1.2762	1.08005	0.986456	1.25194	1.30396	1.96446
1.24236	1.53531	1.37968	0.990087	1.01025	0.962066	1.08513	0.952781
1.96644	1.65723	1.17768	1.32044	1.02359	1.22335	0.927255	0.915114
0.877862	0.970941	1.24899	1.05307	1.05817	1.21198	1.28234	0.924699
0.824095	1.42307	1.47627	1.32657	1.31977		1.32694	0.916365
0.907045	0.990092	1.75303	0.938923	0.915441	1.30169	2.05596	1.11215
0.995169	1.63037	1.30636	0.758025	1.18231	1.40416	1.09262	1.2083
1.14344	1.33561	1.21987	1.43394	1.22572	1.43093	1.77886	1.17528
1.43432	1.22792	2.52625	0.82062	0.788621	1.09027	1.26345	0.96442
1.11174	1.5018	1.05062	1.40423	1.10707	1.32436	1.23546	0.931302
1.21404	1.80394	1.15303	2.0063	1.27646	1.1333	1.86374	1.06404
1.14888	1.14644	1.01032	1.50432	1.44254	1.53432	1.69755	0.99999
0.994588	1.33912	1.07192	1.63512	1.134	1.01561	1.20863	1.34666
0.954401	1.45586	1.48619	3.29351	1.01125	1.30242	1.46331	1.23852
1.20283	1.441	1.07019	1.35869	0.991165	1.2736	0.932448	0.969084
0.899402	1.25291	1.24556	1.1085	1.15658	1.47904	1.88005	1.01384
1.19507		1.24757	1.44748	0.851268	1.2111	1.16851	1.07237
	1.09425	1.21214	0.996014	0.954765	0.981485	1.62719	0.896953
	2.33406	1.28625	1.21215	1.00852	1.01194	1.96021	0.880149
	1.33435	1.12755	1.30566	1.1979	1.39972	2.1033	1.10525
	1.40251	1.67598	1.72684	1.01908	1.26598	1.39708	0.907589
	0.883631	1.7917	2.16404	1.24488	1.38073	1.069	1.09029
	2.41823	1.20683	1.30521	0.895482	1.21859	2.10137	1.0146
	1.11999	1.12314	1.14395	1.03198	1.16275	2.04477	1.21927
	1.044	1.46118	1.2531	1.02707	1.19676	1.31971	1.18442
	1.00737	1.02004	1.46541	1.00948	1.51059	1.02103	1.08505
	1.50614	0.98721	0.872136	0.934944	0.918753	1.78861	1.39049
	1.44091	1.07421	1.42431	1.16827	1.72497	1.32472	0.949378
	1.85074	1.18975	1.43361	1.1475	1.53405	1.19833	0.999765
	1.03905	1.41876	1.82665	1.12639	1.31682	1.08941	1.35144
	1.33374	1.25987	1.38898	0.897867	1.54174	1.37136	0.893386
	1.80685	1.1624	1.34541	0.950324	1.35567	1.08609	1.2029
	0.835051	1.11862	1.1848	1.00148	1.39303	1.54605	1.04842
	1.99588	1.20099		0.971175	1.94125	1.57875	1.05334
	1.45943	1.04611	1.10185	1.08549	1.23199	1.01291	1.15313
	1.0917	0.99373	3.43066	1.28578	1.18428	1.5701	0.864798
	1.31019	1.29742	1.23217	1.3429	1.24975	0.95453	1.33031
	1.13112	1.62547	1.12711	1.07616	1.36051	1.5249	1.26406
	1.23843	1.02801	1.29941	0.947998		1.11004	1.55311
	1.3398	0.905686	1.35814	1.21398	1.64488	1.30372	0.908128
	1.00947	1.14872	1.29807	1.18414	1.64958	1.07228	1.12703
	1.34721	1.05778	1.47309	0.918983	1.3433	1.57103	1.07294
	1.20568	1.03279	1.8742	1.10384	1.45702	1.37691	1.4267
	0.985172	1.4056	1.20323	0.818951	1.16901	1.6382	0.955732
	1.39985	1.34109	1.53869	1.2589	1.20431	1.70302	1.13565
	1.04176	1.1395		1.08084	1.28025	1.15444	0.978622
	1.14712	1.32305	1.72326	1.10525	1.12362	1.22025	0.927584
		1.11792	1.16066	1.02744	1.39255	1.30971	1.33083
		1.14739	1.14252	1.293	1.15224	2.1392
	1.0869	0.978715	1.49668	1.22097	1.04703	1.49742
	0.849025	0.920506	2.19725	0.969646	1.35436	1.39156
	1.07743	1.27678	1.11395	1.22135	1.38198	1.33754
	1.6876	1.45451	0.937321	1.38037	1.22344	1.66501
	1.11695	1.12391	1.64992	1.00532	1.15229	1.33671
	1.46431	1.80732	1.19181	1.12892	1.26372	1.11094
	0.928254	1.01742	1.5809	1.07375	1.27703	1.64096
	1.22323	1.25848	1.48041	1.08552	1.14307	1.34837
	0.869859	1.12668	1.02034	1.02073	1.09867	1.36974
	1.9445	1.27768	0.95244	0.968976	1.47178	1.8561
		1.02006	1.14343	0.923275	1.57137	1.36128
	2.0154	1.11511	1.58333	1.11772	1.00879	1.47722
	1.01922	1.02843	1.26059	0.869345	1.33096	1.67452
	1.09855	1.06709	2.19107	1.07969	1.32708	1.12929
	1.28494	1.31516	1.55756	1.0107	1.13745	0.960647
	1.0057	1.23138	0.969327	0.986619	1.52972	1.59861
	1.16846	1.06118		1.101	1.65	1.30947
	0.786967	1.55624	1.11596	0.848383	1.09526	2.32231
	1.69972	1.37992	1.45355	0.839317	1.28326	1.73619
	1.53262	1.64741	1.08587	1.33241	0.927447	1.97162
	1.04508	1.23499	1.13457	0.859363	1.13998	1.39672
	2.10042	1.03339	2.25863	1.00295	1.52472	1.28729
	1.15505	1.00694	2.21114	1.23489	1.16732	1.4951
	1.49691	1.43979	1.54952	0.920569	1.13792
	1.28925	1.69406	2.25639	0.860237	0.984317	1.38215
	1.13872	1.45299		0.883454	1.18563	0.903581
	1.96954	1.32013		0.899221	1.21469	1.66678
	2.0713	1.60631		1.28364		1.36565
	2.14391	1.58782		0.910744	1.05581	1.49914
	1.26034	2.0104		1.01427	1.34681	1.20542
	1.27344	1.3764		0.942031	1.4868	1.4104
	2.26819	1.58987		0.916741	1.377	1.46563
	1.93195	1.37206		1.24305	1.30811	1.17249
	1.16539	1.2233		1.09461	1.18423	1.51502
	1.19356	1.47507		0.950924	1.17195	1.59262
	1.3583	1.39246		1.11726	1.57685	1.0115
	1.39587	1.31531		0.934719	1.69286	1.36037
	1.10786	1.78015		1.10394	1.30302	1.96077
		1.63327		1.00693	1.50455	1.69674
	1.06624	1.57029		1.02707	1.21169	1.0967
	0.899981	1.50261		1.13045	1.18304	1.3036
	0.950268	1.28283		0.824441	1.06763	1.30674
	0.839403	1.16785		0.947055	1.16271	1.50018
	1.43145	1.7292			1.04766	1.82621
	1.02703	1.63637			1.19522	1.29442
	1.29047	1.94659				1.39935
	1.52193	1.69184				1.73447
	1.18986	1.5787				0.886212
	1.99132	1.02794				1.30247
	1.11311	1.00182				1.26217
	1.70989	1.44216				1.14023
	1.24547	1.24006				1.20465
	1.17597	2.19182				1.13643
	1.89882	1.83188				0.982463
		1.08588				1.03565
	1.62528	1.47054				1.18144
	1.2914	1.21081				1.10007
	0.861017	1.52641				1.64889
		1.29087				1.30411
	1.83246	1.12203				1.54235
	1.28448	1.12487
	1.34359	1.24164
	1.16909	1.11734
	1.04599	1.40332
	0.931038	1.99393
	1.26056	1.32128
	0.993175	1.55137
	1.93417	1.60371
	1.09201	1.19364
	1.05887	2.43245
	0.812742	1.47535
	1.1587	1.283
		1.96119
		1.40597
		1.62391
		1.20724
		1.14397
		0.961754
		1.47169
		1.59911
		1.46616
		1.80919
		1.12757
		1.55868
		1.48237
		1.62385
		1.36473
		1.63789
		1.64674
		1.64929
		1.29791
		1.83134
		1.61493
		1.23676
		2.15763
		1.33683
		1.44919
		1.74309
		2.45887
		1.07126
		1.38662
		2.37577
		1.88225
		1.80541
		1.69835
		1.9493
		1.49923
		1.33091
		1.69802
		1.35845
		1.00694
		1.40134
		2.30103
		1.08557
		1.20884
		1.23306
		1.40821
		1.63603
		1.40993
		1.38247
		1.40918
		2.40697
		1.25109
		1.53725
		1.3479
		1.26562
		1.74374
		1.48766
		1.39233
		1.51642
		1.13096
		1.92338
		1.8516
		1.29014
		0.942227
		1.06632
		1.57018
		1.44542
		1.76654
		1.39678
		1.027
		1.95586
		1.03828
		1.91137
		1.1522
		1.49112
		1.37693
		1.61247
		1.78799
		1.6996
		1.85266
		1.61183
		1.67114
		1.38583
		1.97291
		1.39508
		2.43034
		1.11472
