# Supplementary material for: VASP-mediated actin dynamics activate and recruit a filopodia myosin
Source: eLife. 2021 May 27;10:e68082. doi: 10.7554/eLife.68082 (PMC8352590; doi:10.7554/eLife.68082)
Supplement: Figure 6—source data 2. [file elife-68082-fig6-data2.xlsx]

## Sheet: Fig 6B  M7 actived vasp- ANOVA
Figure 6B. ANOVA of activated Myo7 in vasp null
Number of families	1
Number of comparisons per family	3
Alpha	0.05
Dunnett's multiple comparisons test	Mean Diff.	95.00% CI of diff.	Significant?	Summary	Adjusted P Value	E-?
GFP-DdMyo7 - vasp- vs. GFP-DdMyo7-CAAX - vasp-	-0.1799	-0.2331 to -0.1267	Yes	****	<0.0001	F	GFP-DdMyo7-CAAX - vasp-
GFP-DdMyo7 - vasp- vs. GFP-DdMyo7-Tail - vasp-	-0.2849	-0.3372 to -0.2326	Yes	****	<0.0001	G	GFP-DdMyo7-Tail - vasp-
GFP-DdMyo7 - vasp- vs. GFP-DdMyo7-KKAA - vasp-	-0.2272	-0.2836 to -0.1708	Yes	****	<0.0001	H	GFP-DdMyo7-KKAA - vasp-
Test details	Mean 1	Mean 2	Mean Diff.	SE of diff.	n1	n2	q	DF
GFP-DdMyo7 - vasp- vs. GFP-DdMyo7-CAAX - vasp-	1.064	1.244	-0.1799	0.02258	237	235	7.967	909
GFP-DdMyo7 - vasp- vs. GFP-DdMyo7-Tail - vasp-	1.064	1.349	-0.2849	0.0222	237	252	12.83	909
GFP-DdMyo7 - vasp- vs. GFP-DdMyo7-KKAA - vasp-	1.064	1.291	-0.2272	0.02392	237	189	9.496	909

## Sheet:  Fig 6C  Tail KKAA Anova
Figure 6C. Anova of cortical recruiment of activated (tail and KKAA) in vasp null
Number of families	1
Number of comparisons per family	2
Alpha	0.05
Sidak's multiple comparisons test	Mean Diff.	95.00% CI of diff.	Significant?	Summary	Adjusted P Value
GFP-DdMyo7-Tail-ax2 control vs. GFP-DdMyo7-Tail - vasp-	0.05857	-0.01668 to 0.1338	No	ns	0.1565	C-G
GFP-DdMyo7-KKAA - ax2 control vs. GFP-DdMyo7-KKAA - vasp-	0.3446	0.2531 to 0.4361	Yes	****	<0.0001	D-H
Test details	Mean 1	Mean 2	Mean Diff.	SE of diff.	n1	n2	t	DF
GFP-DdMyo7-Tail-ax2 control vs. GFP-DdMyo7-Tail - vasp-	1.407	1.349	0.05857	0.0336	351	252	1.743	997
GFP-DdMyo7-KKAA - ax2 control vs. GFP-DdMyo7-KKAA - vasp-	1.635	1.291	0.3446	0.04084	209	189	8.436	997
