# Supplementary material for: VASP-mediated actin dynamics activate and recruit a filopodia myosin
Source: eLife. 2021 May 27;10:e68082. doi: 10.7554/eLife.68082 (PMC8352590; doi:10.7554/eLife.68082)
Supplement: Figure 6—source data 3. [file elife-68082-fig6-data3.xlsx]

## Sheet: Figure 6D activatd  vasp - filo
Figure 6D Activated-Myo7 in vasp- filopodia counts
control Ax2			vasp null
GFP-DdMyo7	GFP-DdMyo7 CAAX	GFP-DdMyo7 KKAA	GFP-DdMyo7	GFP-DdMyo7 CAAX	GFP-DdMyo7 KKAA
0	8	5	0	0	1
6	1	6	0	0	0
0	3	4	0	0	0
0	2	1	0	0	0
1	7	4	0	0	0
0	2	2	0	0	0
8	2	7	0	0	0
7	4	1	0	0	0
2	5	7	0	0	0
0	2	5	0	0	0
0	3	4	0	0	0
0	0	0	0	0	0
0	0	2	0	0	0
0	1	4	0	0	1
3	8	2	0	0	0
2	1	6	0	0	0
0	0	4	0	0	1
1	13	2	0	0	1
0	3	16	0	0	0
4	2	1	0	0	0
0	12	0	0	0	1
7	3	4	0	0	0
6	4	1	0	0	0
0	0	9	0	0	0
1	3	2	0	0	0
2	1	7	0	0	0
1	1	11	0	0	0
1	1	9	0	0	0
0	3	6	0	0	0
4	1	3	0	0	0
1	5	2	0	0	0
6	6	0	0	0	0
1	7	1	0	0	0
3	4	4	0	0	0
11	2	1	0	0	0
6	3	2	0	0	0
0	0	1	0	0	0
5	1	2	0	0	0
0	4	11	0	0	0
0	13	3	0	0	0
1	4	2	0	0	0
2	1	3	0	0	0
0	0	3	0	0	0
0	1	2	0	0	0
1	0	6	0	0	0
1	1	0	0	0	0
1	3	7	0	0	0
1	0	3	0	0	0
1	2	3	0	0	0
1	3	0	0	0	0
1	1	2	0	0	0
0	2	1	0	0	0
0	6	13	0	0	0
1	1	12	0	0	0
0	1	2	0	0	0
0	4	2	0	0	0
0	0	2	0	0	0
0	0	5	0	0	0
0	1	6	0	0	0
0	5	4	0	0	0
0	1	4	0	0	0
3	2	4	0	0	0
1	1	13	0	0	0
1	2	12	0	0	0
0	2	7	0	0	0
1	2	3	0	0	0
0	11	0	0	0	0
0	1	2	0	0	0
0	6	4	0	0	0
0	5	4	0	0	0
0	1	6	0	0	0
0	0	8	0	0	0
0	2	1	0	0	0
0	2	1	0	0	0
1	0	6	0	0	0
0	0	2	0	0	0
0	3	6	0	0	0
0	1	4	0	0	0
1	2	10	0	0	0
0	3	4	0	0	0
0	2	2	0	0	0
0	6	3	0	0	0
1	7	0	0	0	0
0	3	3	0	0	0
0	3	0	0	0	0
2	0	3	0	0	0
0	0	3	0	0	0
0	3	0	0	0	0
0	2	3	0	0	0
1	2	1	1	0	0
2	1	0	0	1	0
0	3	0	0	0	0
0	6	1	0	0	0
0	2	1	0	0	0
0	2	3	0	0	0
2	6	5	0	0	0
0	1	5	0	0	0
0	5	4	0	0	0
0	3	13	0	0	0
0	0	1	0	0	0
1	1	0	0	0	0
0	1	1	0	0	0
2	0	1	1	0	1
0	4	0	1	0	0
0	2	0	0	0	0
0	4	5	0	0	0
0	0	1	0	0	0
0	0	0	0	0	0
1	0	1	0	0	0
0	1	9	0	0	0
0	0	1	0	0	0
0	0	0	0	0	0
0	0	2	0	0	0
0	0	2	0	0	0
1	1	0	0	0	0
0	0	0	0	0	0
1	1	0	0	0	0
1	0	0	0	0	0
0	0	0	0	0	0
1	0	2	1	0	0
1	0	0	0	0	0
0	0	2	0	0	0
0	0	0	0	0	0
0	0	5	1	0	0
1	0	1	0	0	0
0	0	0	0	0	0
0	0	0	0	0	0
0	0	1	0	0	0
0	0	0	0	0	0
0	0	0	0	0	0
0	0	0	0	0	0
0	0	1	0	0	0
0	0	2	0	0	0
0	0	1	0	0	0
0	0	5	0	0	0
0	0	2	0	0	0
0	3	0	0	0	0
0	0	1	0	0	0
0	0	1	0	0	0
1	0	1	0	0	0
0	0	2	0	0	0
0	0	0	0	0	0
0	1	0	0	0	0
0	0	1	0	0	0
0	2	1	0	0	0
2	0	0	1	0	0
0	0	1	0	0	0
1	0	1	0	0	0
1	0	0	0	0	0
0	0	3	0	0	0
3	0	6	0	0	0
0	1	1	0	0	0
0	1	0	0	0	0
0	1	0	0	0	0
0	1	5	0	0	0
1	2	1	0	0	0
1	0	0	0	0	0
1	0	4	0	0	0
3	0	0	0	0	0
0	0	5	0	0	0
0	1	0	0	0	0
1	0	2	0	0	0
	0	0	0	0	0
	0	5	0	0	0
	0	0	0	0	1
	0	1	0	0	0
	0	2	0	0	0
	1	0	0	0	0
	0	0	0	0	0
	0	0	0	0	0
	1	1	0	0	0
	0	3	0	0	0
	2	2	0	0	0
	0	2	0	0	0
	0	0	0	0	0
	0	0	0	0	0
	1	0	0	0	0
	0	0	0	0	0
	0	0	0	1	0
	0	0	0	1	0
	0	0	1	2	0
	0	1	0	0	0
	1	1	0	0	0
	4	0	0	0	0
	1	3	0	0	0
	2	2	0	0	0
	0	1	0	1	0
	1	4	0	0	0
	1	6	0	0	0
	0	0	0	0	0
	0	7	0	0	0
	1	4	0	0	0
	0	1	0	0	0
	2	2	0	0
	4	0	0	0
	0	1	0	0
	0	0	0	0
	0	2	0	0
	0	0	0	0
	1	8	0	0
	0	10	0	0
	0	0	0	0
	2	0	0	1
	0	0	0	0
	2	1	0	0
	8	4	0	0
	1	3	0	0
	0	5	0	0
	1	2	0	0
	0	0	0	0
	0	1	0	0
	0	2	0	2
	1	9	0	0
	2	2	0	0
	10	1	0	0
	0	3	0	0
	1	3	0	0
	1	3	0	0
	2	0	0	0
	4		0	0
	1		0	0
	5		1	0
	1		0	0
	0		0	0
	0		0	0
	0		0	1
	0		0	0
	0		0	0
	0		0	0
	0		0	0
	0		0	0
	0		0	0
	7		0	0
	0		0	0
	3		0	1
	0		0	0
	3		0	0
	0			1
	0			0
	0
	0
	0
	0
	0
	1
	5
	0
	0
	0
	4
	2
	3
	0
	0
	0
	7
	0
	1
	0
	0
	0
	0
	2
	0
	1
	1
