# Supplementary material for: VASP-mediated actin dynamics activate and recruit a filopodia myosin
Source: eLife. 2021 May 27;10:e68082. doi: 10.7554/eLife.68082 (PMC8352590; doi:10.7554/eLife.68082)
Supplement: Figure 6—source data 4. [file elife-68082-fig6-data4.xlsx]

## Sheet: CAAX KKAA filo ANOVA
Figure 6D. ANOVA of filopodia in activated (CAAX and KKAA) in vasp
Number of families	1
Number of comparisons per family	2
Alpha	0.05
Sidak's multiple comparisons test	Mean Diff.	95.00% CI of diff.	Significant?	Summary	Adjusted P Value
GFP-DdMyo7-CAAX - ax2 control vs. GFP-DdMyo7-CAAX - vasp-	1.506	1.116 to 1.896	Yes	****	<0.0001	B-F
GFP-DdMyo7-KKAA - ax2 control vs. GFP-DdMyo7-KKAA - vasp-	2.617	2.185 to 3.049	Yes	****	<0.0001	D-H
Test details	Mean 1	Mean 2	Mean Diff.	SE of diff.	n1	n2	t	DF
GFP-DdMyo7-CAAX - ax2 control vs. GFP-DdMyo7-CAAX - vasp-	1.556	0.05021	1.506	0.174	266	239	8.654	913
GFP-DdMyo7-KKAA - ax2 control vs. GFP-DdMyo7-KKAA - vasp-	2.653	0.03627	2.617	0.1928	219	193	13.57	913
