# Supplementary material for: VASP-mediated actin dynamics activate and recruit a filopodia myosin
Source: eLife. 2021 May 27;10:e68082. doi: 10.7554/eLife.68082 (PMC8352590; doi:10.7554/eLife.68082)
Supplement: Figure 6—source data 5. [file elife-68082-fig6-data5.xlsx]

## Sheet: Cortical Intensity SD
CORTICAL INTENSITY Standard deviation (cortical asymmetry)
Figure 6. Cortical standard deviation measurements measured for each cell.
GFP-DdMyo7-KKAA in myo7-	GFP-DdMyo7-KKAA in vasp-
420.627	202.877
492.913	169.64
492.892	193.987
615.542	141.854
1009.17	74.2908
486.979	134.646
1433.54	470.413
1778.42	485.361
629.868	729.953
1036.89	103.707
698.113	234.563
1663.41	175.326
788.066	169.712
1069.51	350.457
313.03	85.9799
1316.08	123.065
321.962	118.217
247.671	360.254
1524.76	423.372
674.761	91.6987
501.788	471.775
486.586	274.734
292.324	123.902
435.184	278.718
831.77	253.313
1495.66	168.585
1966.81	83.5344
282.761	191.611
1041.02	287.346
317.279	383.582
1434.77	364.99
354.094	314.544
1964.14	158.612
473.543	141.225
442.322	100.033
864.167	128.545
316.072	300.276
238.963	105.763
557.256	206.435
588.811	177.836
855.816	199.506
484.035	190.587
503.327	270.901
733.783	154.286
534.994	209.412
249.802	178.407
761.748	304.412
533.386	303.248
1788.83	205.431
0	215.073
262.395	91.9713
1449.09	159.982
1776.77	326.675
1039.98	140.228
599.986	235.621
577.808	295.535
469.486	165.811
339.714	323.015
1060.1	259.768
830.825	166.893
517.737	247.59
1109.97	226.543
1345.63	131.025
954.265	190.231
1333.93	169.158
459.799	160.381
1017.12	181.054
350.214	245.905
673.842	159.196
367.37	169.429
1357.11	213.084
957.538	133.912
1395.43	281.051
1072.8	148.74
2171.1	181.636
1141.53	279.581
1146.42	220.996
911.213	196.827
231.175	236.499
1306.47	173.991
2472.85	127.395
508.538	124.85
897.752	119.478
1492.55	132.614
929.207	128.951
1306.15	169.169
1134.46	247.585
393.832	253.545
388.13	210.801
544.58	168.958
294.353	106.173
791.683	121.344
275.301	209.06
957.439	151.612
1759.49	162.007
830.798	253.649
1488.85	262.074
1202.44	144.417
352.703	313.377
577.49	150.206
713.606	292.417
919.322	191.843
526.48	255.975
923.949	430.587
998.992	273.629
539.47	76.4928
586.914	134.758
547.73	79.4774
	129.103
436.987	106.436
	93.6268
289.164	80.4787
480.936	130.935
734.989	126.65
1294.22	123.058
1607.19	163.167
971.479	173.685
1712.37	128.701
705.557	115.964
1003.09	100.361
615.734	296.808
869.317	121.903
740.031	123.384
1554.16	103.398
791.658	211.25
383.271	163.601
1247.63	241.848
473.8	106.778
1550.61	158.267
1419.14	303.067
1133.46	297.632
1923.24	44.3446
1691.48	46.6368
	45.9353
	46.0294
	49.9357
	49.8724
	47.8773
	69.8936
	46.3941
	48.9887
	216.69
	48.0048
	50.8608
	192.111
	47.7203
	163.098
	259.307
	282.48
	380.538
	282.288
	47.1274
	85.8445
	91.8865
	224.824
	147.728
	138.851
	221.006
	209.848
	126.004
	115.292
	271.555
	121.366
	559.331
	186.735
	262.386
	147.15
	223.036
	206.296
	299.681
	198.318
	241.046
	177.502
	269.517
	333.051
	171.92
	178.844
	261.202
	351.571
	294.652
	183.544
	289.341
	411.869
	266.783
	186.31
	303.481
	198.593
	447.322
	400.845
	213.978
	763.259
	384.1
	445.986

## Sheet: t-test
Figure 6E. SD Analyzed t-test cortical dispersion band var sq rt
Column C	KKAA in vasp-
vs.	vs.
Column B	KKAA in myo7-
Unpaired t test
P value	<0.0001
P value summary	****
Significantly different (P < 0.05)?	Yes
One- or two-tailed P value?	Two-tailed
t, df	t=18.02, df=322
How big is the difference?
Mean of column B	874.5
Mean of column C	205.5
Difference between means (C - B) ± SEM	-668.9 ± 37.12
95% confidence interval	-742.0 to -595.9
R squared (eta squared)	0.5022
F test to compare variances
F, DFn, Dfd	18.92, 130, 192
P value	<0.0001
P value summary	****
Significantly different (P < 0.05)?	Yes
Data analyzed
Sample size, column B	131
Sample size, column C	193
