# Supplementary material for: VASP-mediated actin dynamics activate and recruit a filopodia myosin
Source: eLife. 2021 May 27;10:e68082. doi: 10.7554/eLife.68082 (PMC8352590; doi:10.7554/eLife.68082)
Supplement: Figure 7—source data 1. [file elife-68082-fig7-data1.xlsx]

## Sheet: Sheet1
CORTICAL INTENSITY Standard deviation (cortical asymmetry)
Figure 7. Cortical standard deviation measurements measured for each cell.
GFP-DdMyo7-E386V ; KKAA in myo7-	GFP-DdMyo7-I426A in myo7-
132.018	249.845
431.931	2170.66
199.963	135.42
126.327	424.485
211.856	775.699
182.226	2049.57
232.373	1031.17
205.941	936.376
88.3479	441.787
150.562	696.901
263.311	290.637
253.257	1203.45
148.295	1527.47
191.525	634.89
175.116	455.625
347.76	100.118
188.804	685.53
342.304	919.597
163.828	623.254
145.988	731.125
228.26	2523.59
159.65	548.147
119.752	860.394
210.632	644.967
159.852	709.511
223.286	1142.94
210.858	1058.86
154.934	1214.87
146.142	917.627
194.155	772.357
154.757	1188.07
176.506	1163.34
136.992	581.428
94.1018	101.844
87.2281	100.075
204.858	136.909
151.744	110.402
176.534	443.788
114.68
89.226
287.955
186.018
229.013
400.164
108.127
264.765
214.336
215.316
158.654
353.567
243.562
127.148
462.906
268.001
157.765
145.092
274.778
181.397
315.106
