# Supplementary material for: VASP-mediated actin dynamics activate and recruit a filopodia myosin
Source: eLife. 2021 May 27;10:e68082. doi: 10.7554/eLife.68082 (PMC8352590; doi:10.7554/eLife.68082)
Supplement: Figure 7—source data 2. [file elife-68082-fig7-data2.xlsx]

## Sheet: Fig 7C  ANOVA cortical SD
Figure 7C. ANOVA of motor mutant cortical SD (cortical asymmentry)
Number of families	1
Number of comparisons per family	3
Alpha	0.05
Sidak's multiple comparisons test	Mean Diff.	95.00% CI of diff.	Significant?	Summary	Adjusted P Value
GFP-DdMyo7-myo7- vs. GFP-DdMyo7-E386V ; KKAA - myo7-	990.7	644.9 to 1336	Yes	****	<0.0001	D-F
GFP-DdMyo7-myo7- vs. GFP-DdMyo7-I426A -myo7-	396.1	-20.86 to 813.1	No	ns	0.0682	D-G
GFP-DdMyo7-KKAA-myo7- vs. GFP-DdMyo7-E386V ; KKAA - myo7-	671.6	294.1 to 1049	Yes	****	<0.0001	E-F
Test details	Mean 1	Mean 2	Mean Diff.	SE of diff.	n1	n2	t	DF
GFP-DdMyo7-myo7- vs. GFP-DdMyo7-E386V ; KKAA - myo7-	1194	202.9	990.7	144.3	272	59	6.864	496
GFP-DdMyo7-myo7- vs. GFP-DdMyo7-I426A -myo7-	1194	797.4	396.1	174	272	38	2.276	496
GFP-DdMyo7-KKAA-myo7- vs. GFP-DdMyo7-E386V ; KKAA - myo7-	874.5	202.9	671.6	157.6	131	59	4.262	496
