# Supplementary material for: VASP-mediated actin dynamics activate and recruit a filopodia myosin
Source: eLife. 2021 May 27;10:e68082. doi: 10.7554/eLife.68082 (PMC8352590; doi:10.7554/eLife.68082)
Supplement: Figure 7—source data 3. [file elife-68082-fig7-data3.xlsx]

## Sheet: Fig 7D Cytoskeleton Summary
Figure 7D Cytoskeleton Summary
	Control				Non-Hydrolyzer
	AC87	% Pellet			AC88	% Pellet
	29 Nov	69			29 Nov	37
						39
	29 Nov	70			29 Nov	37
		64				29
	re-run	66
	2 Dec	73			2 Dec	18
		67				8
		72				14
		76				2
	7 Dec	73			7 Dec	18
		67				8
		72				14
		76				2
	AVERAGE	70.4167			AVERAGE	18.8333
	N = 4	n = 12			N = 4	n = 12
N=experiments
n=total technical replicates
AC87	mNeon-DdMyo7
AC88	mNeon-DdMyo7 non-hydrolyzer E386V

## Sheet: t-test
Figure 7D Cytoskeleton t-test
Column B	DdMyo7-E386V
vs.	vs.
Column A	DdMyo7
Unpaired t test
P value	<0.0001
P value summary	****
Significantly different (P < 0.05)?	Yes
One- or two-tailed P value?	Two-tailed
t, df	t=12.67, df=22
How big is the difference?
Mean of column A	70.42
Mean of column B	18.83
Difference between means (B - A) ± SEM	-51.58 ± 4.070
95% confidence interval	-60.02 to -43.14
R squared (eta squared)	0.8795
F test to compare variances
F, DFn, Dfd	12.10, 11, 11
P value	0.0003
P value summary	***
Significantly different (P < 0.05)?	Yes
Data analyzed
Sample size, column A	12
Sample size, column B	12
