# Supplementary material for: VASP-mediated actin dynamics activate and recruit a filopodia myosin
Source: eLife. 2021 May 27;10:e68082. doi: 10.7554/eLife.68082 (PMC8352590; doi:10.7554/eLife.68082)
Supplement: Figure 7—source data 4. [file elife-68082-fig7-data4.xlsx]

## Sheet: Motor mutant Cortexcell
Figure 7E Motor mutants Cortex cell ratio
GFP-DdMyo7 in myo7-	GFP-DdMyo7-KKAA in myo7-	GFP-DdMyo7-E386V in myo7-	GFP-DdMyo7-E386V ; KKAA in myo7-	GFP-DdMyo7-I426A in myo7-
1.2027	2.7669	1.10608		0.928151
0.899137	1.27863	1.29877	1.45715	1.02175
0.900698	0.905584	1.09125	1.4172	1.1339
1.16592	0.807838	0.923883	1.58218	1.25955
1.18206	1.09292	0.884553	1.02029	0.869639
1.11266	2.50758	1.12229	1.58543	1.00356
1.30089	1.07955	0.937394	1.08717	0.780661
0.999162	2.0685	1.05475	1.70546	1.15513
1.00079	1.83615	0.999549	1.00621	1.2103
1.51158	1.16843	1.11841	0.929367	0.817808
0.913675	1.0981	0.827518	1.1082	1.20688
0.943629		1.10042	1.34423	1.01584
0.950612		1.01669	1.7376	0.930577
0.937108	0.957054	1.18587	1.18275	1.11637
1.47733	1.3972	0.838873	0.945274	1.23969
0.92076	1.22028	1.01569	1.71013	1.60657
1.20709	1.37946	1.00065	1.49637	1.43416
0.930184	0.922464	1.18914	1.26294	1.63852
1.2956	1.051	1.17844	2.14871	1.09247
1.03007	1.96836	0.979079	1.84409	1.53057
1.02241	1.36492	1.18913	1.23521	0.882393
0.909945	1.40147	0.893416	1.24651	1.20962
1.27319	1.33563	1.0151	1.09161	1.15906
0.929617	1.06763	1.09843	1.64479	1.45682
0.894711	2.84539	1.01987	1.76276	1.11321
0.999738	1.12573	0.963667	1.05617	1.15584
1.11933	1.103	1.0794	1.78831	1.25729
1.19028	1.08704	0.99044	1.24306	1.02976
1.15468	1.14878	1.23364	1.26801	1.37856
0.871627	2.23737	0.854937	1.4471	1.54066
1.03384	1.1314	1.14968	1.35898	1.39616
0.879394	2.23453	0.987507	1.58535	1.31842
1.03402	1.31452	0.974163	1.33907	1.06658
0.892788	1.31216	1.05901	1.51469	1.26468
1.05908	1.35984	0.969107	1.52461	1.39355
1.1224	1.02639	0.853323	1.20261	1.33109
1.1207	1.32043	0.957678	1.47972	1.25029
1.37377	1.00781	1.17453	1.05734	1.19192
1.14864	1.4075	1.01323	0.969852
1.11359	1.1285	0.918199	1.26935
1.01197	1.03664	0.844855	1.51931
1.49551	1.28592	1.14766	1.16077
1.81293	1.466	1.14819	0.97843
0.925573	2.3189	0.83752	1.07984
2.41267	0.868951	0.945123	1.12462
1.32152	1.10919	0.998522	1.0825
1.36318	3.03019	1.05487	1.04166
1.23141	2.8952	1.02929	1.15906
1.11232		0.799006	1.45682
1.74774	3.61275	1.13691	1.12944
1.11691	1.15575	0.951122	1.15584
1.33142	2.07448	0.782361	1.2433
1.17952	1.11928	0.83977	1.02976
1.3761	3.31373	0.857028	1.39939
0.885856	0.971547	1.08318	1.54066
1.50301	1.77689	0.99255	1.39616
1.37854	2.0108	0.86679	1.3443
1.20127	1.20188	0.916037	1.06658
1.19328	1.59207	0.864312	1.25222
1.29219	2.43724	1.43278	1.44688
1.0774	1.05379	1.02817	1.53102
1.08623	1.12594	1.02014	1.62694
0.963907	1.67228	0.947736	1.31437
1.64512	1.64409	0.914946	1.20025
0.913398	1.11973	1.20114	1.26344
1.06762	1.12237		1.60504
1.3405	1.15047	1.22137	1.65621
1.0404	1.42783	0.921994	1.17104
1.2069	2.18186	1.04527	1.68012
1.51852	1.27093	0.997306	1.00992
0.900465	1.4793	1.42186	1.15361
1.05082	1.71202	1.12753	1.75791
1.04001	3.71396	1.19529	1.15018
1.00178	2.48674	0.952301	1.07833
1.06672	1.8088	1.00637	1.39949
1.12491	2.46319	0.936184
1.09114	1.49105	0.901832
1.65721	1.22127	0.994113
1.46941	1.02326	0.954973
0.888938	2.13353	1.20722
0.81068		1.09669
1.11688	3.00888	0.815381
0.953931	3.43933	0.931051
0.991371	1.95182	0.883572
1.36681	1.00954	1.00219
1.34042	3.68531	0.907756
1.74154	2.12755	0.905024
0.860065	1.12932	0.970806
1.15657	1.06662	1.37972
1.35811	1.29538	1.25138
1.15393	0.990072	0.821674
0.946268	1.59377	0.846181
1.70311	1.06986	0.783511
0.985134	2.89294	0.88496
1.00077	3.32835	1.11347
1.29416	1.48428	0.961282
0.922337	1.03332	0.773966
0.956444	2.71035	0.946508
0.952727	0.817151	0.838076
1.07206	2.07644	1.12898
1.48212	3.31423	0.896624
1.03316	2.24719	0.855025
0.925889	1.56554	0.844897
0.926137	1.95504	0.935009
0.869782	1.03775	0.887826
0.874385	1.38927	1.27548
0.997944	2.00604	1.18519
1.14518	1.24905	1.45826
1.34901		1.40609
1.48023	1.5247	0.926385
1.23725		0.842377
0.939732	1.22289	0.946119
1.24076	1.19437	0.945913
0.924294	1.43095	0.876021
0.835673	1.99954	0.90142
0.841989	1.20476	0.855445
0.881993	1.32082	0.932305
0.861035	3.03424	1.18151
0.948451	1.80131	0.984271
1.42918	2.709	0.810289
1.38636	1.62094	0.930842
0.936309	1.31838	1.31928
0.872796	1.21536	0.940767
1.47092	1.08278	1.18501
1.36482	1.67709	1.25977
1.14972	1.22507	1.18073
0.894576	2.14745	1.44506
0.925678	3.37615	1.36696
1.29457	1.31283	1.18811
1.36577	1.66307	0.861318
1.05832	1.16118	0.887225
1.15394	1.96156	0.959484
0.945022	1.32729	1.00178
1.08678		0.897847
1.21814		0.997103
1.16881		0.938398
0.949827		1.54328
0.843927		0.918767
1.33588		0.806062
1.38346		0.859937
1.25776		0.88806
1.3559		1.30192
1.20729		0.898146
1.10314		0.869263
1.42315		0.836172
1.15131		1.24669
1.2661		0.834941
1.54739		0.783117
1.38451		0.890603
1.25636		0.872828
1.02716		1.06505
0.971556		0.799397
1.28822		1.06973
1.13722		0.984053
0.946009		0.866958
1.08081		0.844374
1.01652		1.04086
1.10124		0.853421
0.93273		0.809942
1.10355		1.08976
1.42297		0.946201
1.15845		1.30563
1.01657		1.47381
1.32751		0.823375
1.49009		0.919634
1.21173		1.14026
1.03026		0.836401
1.07734		0.894842
1.04519		0.942025
1.31699		1.0192
1.183		0.840333
1.0503		0.779653
1.47328		0.933607
1.33007		0.999623
1.21669		0.841187
1.05957
1.11711		0.800133
0.92335		0.868797
2.47498
1.11186
3.55227
1.89428
1.64235
1.1907
1.05212
0.912243
0.9558
1.09535
1.2315
1.07377
1.31137
1.07621
1.31681
1.37273
