# Supplementary material for: VASP-mediated actin dynamics activate and recruit a filopodia myosin
Source: eLife. 2021 May 27;10:e68082. doi: 10.7554/eLife.68082 (PMC8352590; doi:10.7554/eLife.68082)
Supplement: Figure 7—source data 5. [file elife-68082-fig7-data5.xlsx]

## Sheet: Page 27 motor cortex ANOVA
Figure 7E. ANOVA motor mutants cortex to cell
Number of families	1
Number of comparisons per family	4
Alpha	0.05
Sidak's multiple comparisons test	Mean Diff.	95.00% CI of diff.	Significant?	Summary	Adjusted P Value
GFP-DdMyo7-myo7- vs. GFP-DdMyo7-E386V - myo7-	0.1717	0.06861 to 0.2748	Yes	***	0.0001	A-C
GFP-DdMyo7-myo7- vs. GFP-DdMyo7-E386V ; KKAA - myo7-	-0.1604	-0.2958 to -0.02509	Yes	*	0.0127	A-D
GFP-DdMyo7-myo7- vs. GFP-DdMyo7-I426A - myo7-	-0.01888	-0.1946 to 0.1568	No	ns	0.998	A-E
GFP-DdMyo7-KKAA - myo7- vs. GFP-DdMyo7-E386V ; KKAA - myo7-	0.3337	0.1889 to 0.4786	Yes	****	<0.0001	B-D
Test details	Mean 1	Mean 2	Mean Diff.	SE of diff.	n1	n2	t	DF
GFP-DdMyo7-myo7- vs. GFP-DdMyo7-E386V - myo7-	1.176	1.004	0.1717	0.04127	194	176	4.161	604
GFP-DdMyo7-myo7- vs. GFP-DdMyo7-E386V ; KKAA - myo7-	1.176	1.336	-0.1604	0.05417	194	74	2.962	604
GFP-DdMyo7-myo7- vs. GFP-DdMyo7-I426A - myo7-	1.176	1.194	-0.01888	0.07033	194	38	0.2684	604
GFP-DdMyo7-KKAA - myo7- vs. GFP-DdMyo7-E386V ; KKAA - myo7-	1.67	1.336	0.3337	0.05798	127	74	5.756	604
