# Supplementary material for: VASP-mediated actin dynamics activate and recruit a filopodia myosin
Source: eLife. 2021 May 27;10:e68082. doi: 10.7554/eLife.68082 (PMC8352590; doi:10.7554/eLife.68082)
Supplement: Figure 7—source data 6. [file elife-68082-fig7-data6.xlsx]

## Sheet: Motor mutants filos
Figure 7F. Motor mutants filopodia counts
GFP-DdMyo7 in myo7-	GFP-DdMyo7-KKAA in myo7-	GFP-DdMyo7-E386V in myo7-	GFP-DdMyo7-E386V ; KKAA in myo7-	GFP-DdMyo7-I426A in myo7-
2	0	0	0	0
2	2	0	0	0
1	0	0	0	0
1	0	0	0	0
1	0	0	0	0
2	3	0	0	0
2	3	0	0	0
2	1	0	0	0
2	0	0	0	0
3	4	0	0	0
2	0	0	0	0
5	4	0	0	0
1	2	0	0	0
1	3	0	0	0
1	0	0	0	0
1	2	0	0	0
2	1	0	0	1
1	1	0	0	1
4	14	0	0	2
1	6	0	1	1
1	2	0	0	0
4	0	0	2	0
7	4	0	0	0
6	8	0	0	0
0	6	0	0	0
0	3	0	0	1
0	2	0	0	0
0	2	0	0	0
0	0	0	0	0
0	1	1	0	0
0	3	0	0	3
0	0	0	0	3
0	0	0	0	0
0	3	0	0	2
0	1	0	0	0
0	3	0	0	0
0	4	0	0	0
0	0	0	0
0	3	0	0
0	6	0	0
3	5	0	0
1	15	0	0
5	5	0	0
1	5	0	0
1	0	0	0
1	0	0	0
1	5	0	0
1	3	0	0
1	4	1	0
1	0	0	0
1	0	0	0
2	4	0	0
2	1	0	0
1	8	0	0
2	2	0	0
1	1	0	0
2	0	0	0
1	0	0	0
1	18	0	0
1	7	0
1	1	0
2	1	0
2	4	0
1	2	0
1	6	0
2	4	0
2	4	0
1	5	0
5	14	0
8	6	0
3	11	0
7	9	0
6	4	0
1	5	0
5	9	0
1	6	0
1	5	0
5	0	0
2	0	0
1	11	0
1	10	0
5	1	0
1	5	0
6	8	0
3	0	0
7	5	0
2	9	0
1	0	0
1	0	0
3	3	0
1	1	0
0	5	0
0	0	0
0	5	0
0	4	0
0	6	0
0	5	0
0	7	0
0	1	0
0	2	0
0	4	0
0	8	0
0	7	0
0	6	0
0	1	0
0	7	0
0	1	0
0	9	0
0	6	0
0	7	0
0	5	0
0	1	0
0	3	0
0	13	0
0	0	0
0	6	0
0	4	0
0	12	0
0	8	0
0	5	0
0	3	0
0	0	0
0	2	0
0	16	0
0	12	0
0	7	0
0	15	0
0	0	0
0	2	0
0	12	0
0	3	0
0	5	0
0	10	0
0		0
0		0
0		0
0		0
0		0
0		0
0		0
0		0
0		0
0		0
0		0
0		0
0		0
0		0
0		0
1		0
5		0
3		0
1		0
5		0
3		0
1		0
1		0
6
3		0
4		0
1		0
10		0
1		0
4		0
6		0
1		0
1		0
0		0
0		0
0		0
0		0
0		0
0		0
3		0
1		0
1		0
1		0
4		0
1		0
3		0
5		0
4		0
2
11		0
3		0
1		0
2		0
0		0
0		0
0
0
0
0
0
0
