# Supplementary material for: VASP-mediated actin dynamics activate and recruit a filopodia myosin
Source: eLife. 2021 May 27;10:e68082. doi: 10.7554/eLife.68082 (PMC8352590; doi:10.7554/eLife.68082)
Supplement: Figure 7—source data 7. [file elife-68082-fig7-data7.xlsx]

## Sheet: ANOVA motor filos
Figure 7F. Anova of motor mutant filopodia counts
Number of families	1
Number of comparisons per family	4
Alpha	0.05
Sidak's multiple comparisons test	Mean Diff.	95.00% CI of diff.	Significant?	Summary	Adjusted P Value
GFP-DdMyo7-myo7- vs. GFP-DdMyo7-E386V - myo7-	1.391	0.8254 to 1.957	Yes	****	<0.0001	A-C
GFP-DdMyo7-myo7- vs. GFP-DdMyo7-E386V ; KKAA - myo7-	1.351	0.5314 to 2.171	Yes	***	0.0002	A-D
GFP-DdMyo7-myo7- vs. GFP-DdMyo7-I426A - myo7-	1.024	0.03445 to 2.013	Yes	*	0.0393	A-E
GFP-DdMyo7-KKAA - myo7- vs. GFP-DdMyo7-E386V ; KKAA - myo7-	4.19	3.327 to 5.052	Yes	****	<0.0001	B-D
Test details	Mean 1	Mean 2	Mean Diff.	SE of diff.	n1	n2	t	DF
GFP-DdMyo7-myo7- vs. GFP-DdMyo7-E386V - myo7-	1.402	0.01075	1.391	0.2265	194	186	6.143	604
GFP-DdMyo7-myo7- vs. GFP-DdMyo7-E386V ; KKAA - myo7-	1.402	0.05085	1.351	0.3281	194	59	4.118	604
GFP-DdMyo7-myo7- vs. GFP-DdMyo7-I426A - myo7-	1.402	0.3784	1.024	0.396	194	37	2.585	604
GFP-DdMyo7-KKAA - myo7- vs. GFP-DdMyo7-E386V ; KKAA - myo7-	4.241	0.05085	4.19	0.3453	133	59	12.14	604
