# Supplementary material for: VASP-mediated actin dynamics activate and recruit a filopodia myosin
Source: eLife. 2021 May 27;10:e68082. doi: 10.7554/eLife.68082 (PMC8352590; doi:10.7554/eLife.68082)
Supplement: Table 1—source data 1. [file elife-68082-table1-data1.xlsx]

## Sheet: Drugs - Filos
Drug Treatments - filopodia counts.
Filopodia count per cell.
0% DMSO	1% DMSO	1μM LatA	5μm LatA	15 μM LatA	1uM CytoA	5uM CytoA	30 uM CytoA	15nM Jasp	50nM Jasp	100nM Jasp	20μM Ly	60μM Ly	2μM WM	25μM CK666	DMSO Noco control	5μm Noco	15μM Noco	50μM Noco
0	0	0	0	0	0	0	0	0	2	0	0	0	0	0	0	1	1	0
0	0	1	0	1	0	0	0	0	7	0	0	0	0	0	0	0	0	0
0	0	0	0	0	0	0	0	0	0	0	0	0	0	0	0	0	0	0
0	1	0	0	0	0	0	0	4	2	1	0	1	3	0	0	0	0	0
1	3	0	0	0	0	0	1	1	1	0	0	1	0	0	0	1	0	1
5	0	0	0	0	0	0	0	0	1	0	0	0	0	0	0	2	1	1
0	0	0	0	3	0	1	0	1	0	1	1	1	0	1	0	0	1	0
0	1	0	1	1	0	0	0	0	0	0	4	0	0	0	0	0	0	0
3	1	1	0	0	0	0	0	3	0	0	0	0	1	0	0	0	0	0
1	1	0	0	0	0	0	0	0	0	1		0	1	0	0	0	0	0
2	0	0	0	0	0	0	0	0	0	0		0	0	0	0	0	0	0
1	1	0	0	0	0	0	0	3	4	3		0	0	1	2	1	1	0
1	0	0	0	0	0	0	0	0	5	1		0	0	0	0	1	0	0
3	0	1	0	0	0	0	0	0	0	3		1	7	0	0	0	0	0
13	0	0	0	0	0	1	0	0	6	0		0	0	0	0	0	2	0
0	0	0	1	0	0	0	1	0	0	1		0	1	0	1	0	0	0
0	0	0	0	0	0	0	0	0	0	0		1	2	0	1	1	0	0
0	1	0	0	0	0	0	1	0	1	2		0	0	0	0	1	0	1
0	4	0	0	0	0	0	1	2	1	0		0	0	0	0	0	0	0
0	1	0	0	0	0	0	0	0	3	0		0	0	0	0	1	0	0
5	1	0	0	0	0	0	0	3	0	1		0	0	0	0	2	0	0
2	0	0	0	0	0	0	0	1	2	0		0	0	0	3	3	0	0
0	0	0	0	1	0	0	1	1	1	1		1	0	0	0	0	0	1
0	0	0	0	0	0	0	0	1	2	3		0	0	0	1	1	0	0
1	1	0	0	0	0	0	0	1	2	0		1	0	0	2	1	0	0
0	6	0	1	0	0	0	0	2	0	1		0	0	0	1	0	0	0
3	0	0	2	0	0	0	0	3	1	0		3	0	0	1	1	0	0
1	0	0	0	0	0	1	1	3	4	0		0	0	0	3	0	0	0
0	3	0	0	1	0	0	0	2	0	1		0	1	0	0	0	1	0
8	5	0	0	0	0	0	0	1	0	3		1	0	0	0	0	0	0
0	4	0	0	0	0	0	0	0	0	1		0	0	0	0	0	0	0
4	0	0	2	0	0	0	0	0	1	0		0	0	0	0	0	0	0
5	5	0	0	0	0	0	0	0	0	1		0	0	0	2	0	1	0
0	3	0	1	0	0	0	0	2	0	0		0	0	0	0	2	0	0
0	0	0	0	0	0	0	1	2	0	0		1	0	0	0	3	0	0
0	3	0	0	0	0	0	0	0	1	1		1	1	0	0	4	0	0
0	0	0	0	1	0	0	0	0	5	0		0	0	1	0	0	0	0
1	0	0	0	0	0	0	0	1	0	0		0	2	2	0	0	0	0
2	0	0	0	0	0	0	1	1	0	0		0	2	1	0	0	0	0
3	5	0	0	1	0	3	0	2	0	3		0	0	0	1	0	0	0
0	0	0	0	0	0	0	0	0	1	1		0	0	4	1	0	0	0
1	0	0	0	0	0	0	0	0	0	0		0	1	2	1	0	0	0
2	0	0	0	0	0	0		0	0	0		7	0	1	0	0	0	0
0	0	0	0	0	0	0		0	0	0		0	0	3	0	0	0	0
1	0	0	0	1	0	0		0	1	3		0	0	0	0	0	0	0
2	0	0	0	0	0	0		2	1	2		0	0	1	0	0	1	0
1	0	0	0	0	0	1		0	1	2		0	0	0	0	0	1	0
1	0	0	0	0	0	0		0	0	0		0	1	2	0	0	1	0
1	0	0	0	1	0	0		2	0	0		0	0	1	0	0	2	0
1	0	0	0	2	0	0		0	0	1		1	0	0	0	0	0	0
0	0	0	0	1	0	0		2	4	1		0	0	0	0	3	0	0
0	0	0	0	0	0	0		0	2	0		0	4	0	0	0	0	1
0	1	0	0	0	0	0		0	0	0		0	0	0	0	0	0	0
0	0	0	0	0	0	0		0	0	0		0	0	0	0	1	0	1
0	0	0	0	0	0	0		4	0	3		0	0	0	0	3	0	0
0	2	0	0	0	0	0		0	0	0		0	0	0	0	0	0	0
1	1	0	0	0	0	1		5	0	4		0	0	0	0	0	0	0
0	0	0	0	0	0	0		0	2	1		0	0	0	0	0	0	0
4	0	0	0	0	0	0		6	0	2		0	0	0	0	0	0	0
4	5	0	0	1	0	0		1	0	2		1	0	0	0		0	0
1	2	0	0	1	0	0		8	0	0		1	1	0	0		0	0
0	1	4	0	0	0	0		1	0	1		1	1	0	0		0	0
0	2	0	0	0	0	0		0	2	0		0	0	0	0		0	0
0	0	0	0	0	0	0		4	0	1		0	0	0	0		0	0
0	0	0	0	0	0	0		0	2	0		1	0	0	0		0	2
1	0	0	0	0	0	0		1	0	0		0	5	0	0		0	1
2	1	0	0	0		0		0	0	4		1	0	0	0		0	0
0	0	0	0	0		1		1	0	3		0	0	0	0		0	0
1	0	0	0	1		0		0	2	2		0	0	0	0		0	0
0	2	0	0	0		0		3	4	0		0	0	0	0		0	0
1	1	0	0	0		0		2	2	0		0	5	0	0		0	0
2	1	0	0	0		0		3	6	0		1	0	0	1		0	0
0	0	0	0	1		0		1	7	1		0	0	0	0		0	0
0	0	0	0	0		0		2	1	0		1	3	0	0		0	0
0	1	0	0	0		0		2	1	1		0	0	0	0		0	0
0	0	1	0			1		0	0	4		1	0	0	0		2	1
0	0	3	0			0		0	0	0		2	0	0	0		0	0
1	0	1	0			0		5	0	1		1	0	0	0		1	0
0	0	2	0			0		12	4	1		1	0	0	0		0	0
1	0	0	0			0		1	6	0		0	0	1	0		0	0
0	0	0	0			0		9	1	0		0	0	0	0		0	0
1	0	0	0			0		1	1	1		0	0	0	1		0	1
0	1	1	0			0		1	4	0		0	0	0	1		0	0
0	0	0	0			0		2	1	0		0	0	0	0		0	0
1	1	0	0			0		4	9	0		0	0	0	0		0	0
0	0	0	0			0			7	0		0	2	0	0		0	0
0	0	0	0			0			0	1		1	1	0	0		0	0
0	1	0	0			1			0	1		6	6	0	0		0	0
0	0	0	0			0			0	0		1	1	0	0		0	0
0	4	0	0			0			1	0		2	0	0	1		0	0
2	1	0	0			1			0	0		0	0	0	0		0	0
1	2	0	0			1			5	0		1	0	0	1		0	0
2	1	7	0			0			0	0		7	4	0	1		0	0
0	2	0	0			1			1	0		0	0	0	0		0	0
0	2	0	0			0			1	0		1	6	1	1		2	0
0	1	3	0			0			0	1		0	0	0	0		0	0
0	1	1	0			0			2	1		0	3	0	0		0	0
0	1	1	0			0			11	1		0	3	0	0		0	0
0	0	2	0			0			1	0		0	0	2	0		0	0
0	2	3	0			0			0	0		2	5	1	0		0	0
1	4	0	0			0			2	0		2	4	0	1		0	0
3	0	0	0			0			3	0		0	7	0	0		0	0
4	0	0	0			0			1	3		1	0	0	3		0	0
0	1	0	0			2			4	0		1	0	0	1		0	0
0	1	0	0			0			6	1		0	0	0	2		0	0
1	6	0	0			0			0	0		0	1	1	0		0	0
1	0	0	0			0			0	2		1	5	0	0		0	0
0	0	0	0			0			1	0		1	1	0	0		0	0
0	0	0	0			2			1	0		1	1	0	0		0	0
1	0	1	0			0			6	3		1		0	0		0	0
0	0	0	0			1			2	0		0		0	0		0	0
0	0	0	0			0			1	2		1		0	0		0	0
1	1	0	0			0			4	2		3		0	0		0	0
1	0	0	0			1			1	0		0		0	1		0	0
1	0	2	0			0			4	0		0		0	1		0	0
0	1	0	0			0			0	1		0		0	3		0	0
1	1	1	0			0			1	1		0		0	5		0	0
0	1	0	0			0			0	1		1		0	0		0	0
0	0	0	0			0			7	2		1		0	0		0	0
1	1	0	0			0			0	0		4		0	0		0	0
1	2	0	0			1			1	0		2		1	0		0	0
0	1	0	0			0			6	0		3		0	0		0	0
0	0	0	0			0			7	0		1		0	1		0	0
0	4	1	0			0			0	0		0		0	0		0	0
0	0	0	0			0			3	3		1		0	0		0	0
2	1	1	0			0			1	0		1		0	0		0	0
0	1	0	0			0			3	0		0		0	0		0	0
0	0	0				0			2	3		2		0	0		1
0	0	0				0			0	2		0		1	1		0
0	0	1				0			4	1		3		0	0		0
1	2	0				0			1	0		0		0	1		0
0	0	0				0			1	0		3		0	0		0
0	0	0				0			0	0		10		0	0		0
0	0	0				0			1	0		1		0	0
2	0	1				0			2	0		0		0	1
0	3	0				0			1	0		3		0	0
0	0	0				0			0	0		2		0	0
1	2	1				0			2	2		0		0	0
0	0	0				0			5	3		0		0
0	4	2				0			1	4		0		0
0	1	0				0			0	0		0		0
0	2	0				0			3	1		0		0
0	0	0				0			2	0		0		0
3	1	0				0			3	1		0		0
3	0	0				0			1	0		1		0
0	0	0				0			2	1		2		0
0	0	1				0			0	2		4		0
0	2	0				0			11	3		0		0
3	1	0				0			7	2		0		0
4	0	0				1			7	1		1		0
1	0	0				0			0	0		1		0
2	1	0				0			6	2		0		0
3	3	0				0			5	5		0		1
1	0	0				0			5	2		0		0
5	0	0				0			1	3		0		0
2	1	0				0			11	2		0		0
2	0	0				0			0	5		2		1
0	1	1				0			6	3		0		0
0	0	1				0			2	1		5		0
0	0	0				0			3	2		0		0
1	0	0				0			1	2		0		0
2	1	0				0			0	2		1		0
0	1	4				0			1	0		1		0
0	0	2				0			8	8		16		0
1	0	0				0			4	1		0		0
0	1	2				0			0	1		0		0
3	0	0				0			0	2		1		0
1	3	2				0			3	1		2		0
0	7	0				2			3	0		0		0
2	0	1				0			2	0		0		0
0	0	1				0			15	11		0		0
0	0	3				0			2	1		0		0
1	0	1				0			3	1		2		0
0	4	6				0			9	3		0		0
1	0	0				0			5	3		2		0
2	0	3				0			0	6		0		0
1	0	2				0			0	3		0		0
2	0	1				0			0	0		0		1
1	0	0				0			1	1		0		0
0	0	0				0			1	2		0		0
0	1	0				0			0	2		0		0
0	0	0				0			7	2		3		0
1	1	0				0			6	2		3		0
0	2	1				0			0	0		0		0
4	0	0				0			6	2		1		0
0	0	0				0			3	1		0		0
0	0	0				0			7	0		0		0
3	0	0				0			4	3		8		0
0	0	0				0			0	0		1		0
1	0	2				0			1	1		0		0
0	0	1				0			0	3		0		0
0	0	0				0			1	3		6		0
2	0	0				0			0	3		1		0
0	0	2				0			0	3		0		0
0	0	0				0			0	2		1		0
3	0	1				0			0	2		1		0
1	0	2				0			8	6		1		1
0	2	1				0			0	3		2		1
0	0	1				0			6	6		0		0
0	0	0				0			6	7		0		2
0	0	1				0			5	0		0		0
0	0	0				0			7	0		4		0
0	0	1				2			0	0		0		0
0	0	0				0			1	0		6		0
2	0	0				0			0	0		0		0
0	1	2				0			0	1		0		0
3	0	1				0			0	0		0		0
0	1	3				0			0	0		4		0
0	0	0				0			0	0		1		0
1	0	0				0			0	1		0		0
2	2	2				0			5	0		1		0
0	0	1				0			8	2		0		0
0	1	0				0			1	3		1		0
0	0	0				0			1	0		0		0
1	0	0				0			1	0		1		1
0	0	0				0			4	0		0		0
3	0	0				0			5	1		0		0
0	0	0				0			2	0		0		0
0	1	0				0			4	0		0		0
1	0	2				0			1	0				0
1	0	0				0			6	0				0
0	2	0				0			6	0				0
0	0	0				0			0	2				0
1	0	0				0			4	1				0
0	0	0				0			7	0				1
0	0	0				0			1	0				0
0	0	0				0			5	2				1
0	0	0				0			0	0				0
0	0	0				0			1	2				1
1		0				0			3	0				0
0		0				0			1	0				0
0		0				0			11	1				0
0		0				0			5	1				0
0		0				0			7	0				0
1		0							2	0				0
0		0							1	0				0
0		0							5	0				0
0		0							4	0				3
		0							8	1				0
		0							0	0				0
		0							2	4				0
		0							7	0				1
		0							0	0				0
		0							1	0				0
		0							0	0				0
		0							0	0				0
		0							2	0				0
		0							0	0				0
		0							2	0				0
		0							0	0				0
		1							0	2				0
		0							2	3				0
		0							6	0				0
		0							0	0				0
		0							1	0				0
		3							0	0				0
		0							2	0				0
		0							5	1				0
		0							1	1				0
		0							4	2				0
		0							2	0				0
		0							7	0				0
		1							2	4				0
		0							0	1				1
		1							10	2				0
		0							3	7				0
		0							5	0				0
		0							3	4				0
		0							4	0				0
		0							2	4				0
		0							3	1				1
		2							1	0				0
		0							1	7				0
		0							3	0				0
		0							0	0				0
		0							3	2				0
		0							4	6				1
		0							16	0				0
		0							1	1				0
		1							0	0				0
		0							0	0				0
		0							9	0				0
		0							2	0				0
		0							6	1				0
		0							4	0				0
		1							7	0				0
		0							10	2				0
		0							0	2				0
		0								1				0
		0								3				0
		0								3				0
		0								3				0
		0								0				0
		0								0				0
		0								0				0
		0								0				0
		4								0				0
		0								0				0
		1								1				0
		2								0				0
		0								0				0
		0								0				0
		0								0				0
		1								0				0
		0								1				0
		0								2				0
		0								1				0
		0								2				0
		1								0				0
		0								3				0
		0								0				0
		2								0				0
		0								3				0
		0								2				0
		0								1				0
		2								0				0
		0								0				0
		0								1				0
		0								0				0
		0								2				0
		1								3				3
		2								2				0
		0								1				0
		1								1				0
		1								3				0
		0								0				0
		0								0				0
		0								2				0
		0								2				1
		0								0				0
		0								1				0
		0								2				0
		1								2				0
		0								0				0
		0								1				0
		1								2				0
		0								2				0
		2												0
		0												0
		2												0
		0												1
		4												0
		0												0
		1												0
		0												0
		2												0
		0												0
		1												0
		0												0
		2												0
		0												1
		0												1
		0												0
		1												0
		0												0
		1												0
		1												0
		0												0
		0												0
		1												0
		1												0
		0												0
		0												0
		0												0
		0												0
		0												0
		0
		0
		0
		0
		0
		0
		0
		0
		0
		0
		0
		0
		2
		1
		0
		0
		2
		0
		0
		0
		0
