# Supplementary material for: VASP-mediated actin dynamics activate and recruit a filopodia myosin
Source: eLife. 2021 May 27;10:e68082. doi: 10.7554/eLife.68082 (PMC8352590; doi:10.7554/eLife.68082)
Supplement: Table 1—source data 2. [file elife-68082-table1-data2.xlsx]

## Sheet: Drug treatment Anova
Table 1/Figure 2 supplement Drugs Anova
Number of families	1										Number of families	1
Number of comparisons per family	2										Number of comparisons per family	3
Alpha	0.05										Alpha	0.05
Dunnett's multiple comparisons test	Mean Diff.	95.00% CI of diff.	Significant?	Summary	Adjusted P Value	B-?					Dunnett's multiple comparisons test	Mean Diff.	95.00% CI of diff.	Significant?	Summary	Adjusted P Value	A-?
1% DMSO vs. 60μM Ly	0.02225	-0.06534 to 0.1098	No	ns	0.8039	M	60μM Ly				DMSO Noco control vs. 5um Noco	0.1604	0.08371 to 0.2370	Yes	****	<0.0001	B	5um Noco
1% DMSO vs. 2μM WM	0.03429	-0.07554 to 0.1441	No	ns	0.7211	N	2μM WM				DMSO Noco control vs. 15uM Noco	0.1906	0.1311 to 0.2501	Yes	****	<0.0001	C	15uM Noco
											DMSO Noco control vs. 50uM Noco	0.2036	0.1440 to 0.2633	Yes	****	<0.0001	D	50uM Noco
Test details	Mean 1	Mean 2	Mean Diff.	SE of diff.	n1	n2	q	DF			Test details	Mean 1	Mean 2	Mean Diff.	SE of diff.	n1	n2	q	DF
1% DMSO vs. 60μM Ly	1.196	1.174	0.02225	0.03931	224	214	0.5661	536			DMSO Noco control vs. 5um Noco	1.308	1.147	0.1604	0.03235	129	55	4.957	433
1% DMSO vs. 2μM WM	1.196	1.162	0.03429	0.04928	224	101	0.6958	536			DMSO Noco control vs. 15uM Noco	1.308	1.117	0.1906	0.02511	129	127	7.589	433
											DMSO Noco control vs. 50uM Noco	1.308	1.104	0.2036	0.02516	129	126	8.093	433
Number of families	1		Filopodia								Number of families	1		Filopodia
Number of comparisons per family	2										Number of comparisons per family	3
Alpha	0.05										Alpha	0.05
Dunnett's multiple comparisons test	Mean Diff.	95.00% CI of diff.	Significant?	Summary	Adjusted P Value	B-?					Dunnett's multiple comparisons test	Mean Diff.	95.00% CI of diff.	Significant?	Summary	Adjusted P Value	A-?
1% DMSO vs. 60μM Ly	-0.1254	-0.4623 to 0.2115	No	ns	0.6297	M	60μM Ly				DMSO vs. 5um	-0.2115	-0.4414 to 0.01839	No	ns	0.0799	B	5um
1% DMSO vs. 2μM WM	-0.09731	-0.5121 to 0.3175	No	ns	0.8294	N	2μM WM				DMSO vs. 15uM	0.205	0.02539 to 0.3845	Yes	*	0.0201	C	15uM
											DMSO vs. 50uM	0.2612	0.07948 to 0.4429	Yes	**	0.0021	D	50uM
Test details	Mean 1	Mean 2	Mean Diff.	SE of diff.	n1	n2	q	DF
1% DMSO vs. 60μM Ly	0.7467	0.8721	-0.1254	0.1512	229	219	0.8294	554			Test details	Mean 1	Mean 2	Mean Diff.	SE of diff.	n1	n2	q	DF
1% DMSO vs. 2μM WM	0.7467	0.844	-0.09731	0.1862	229	109	0.5227	554			DMSO vs. 5um	0.3478	0.5593	-0.2115	0.09701	138	59	2.18	453
											DMSO vs. 15uM	0.3478	0.1429	0.205	0.07578	138	133	2.705	453
											DMSO vs. 50uM	0.3478	0.08661	0.2612	0.07668	138	127	3.406	453
