# Supplementary material for: VASP-mediated actin dynamics activate and recruit a filopodia myosin
Source: eLife. 2021 May 27;10:e68082. doi: 10.7554/eLife.68082 (PMC8352590; doi:10.7554/eLife.68082)
Supplement: Table 1—source data 3. [file elife-68082-table1-data3.xlsx]

## Sheet:  Drugs - Cortexcell
Table 1 Figure 2 Drug Treatments - cortex/cell ratios.
Compiled values for all measurements made for each strain
0% DMSO	1% DMSO	1μM LatA	5μm LatA	15 μM LatA	1uM CytoA	5uM CytoA	30 uM CytoA	15nM Jasp	50nM Jasp	100nM Jasp	20μM Ly	60μM Ly	2μM WM	25μM CK666	DMSO Noco control	5μm Noco	15μM Noco	0% DMSO
0.986163	1.08553		1.13982	1.14529	1.09855	0.961035	0.898798	1.03546	1.35035	1.0537	0.916592	1.26025	1.41944	0.905826	1.16915	1.06798	1.16481	1.15238
1.01307	1.0685		1.06412	1.24306	0.893098	0.918668	0.883692	1.17582		1.18682	1.40339	1.16138		1.02853	2.06353	1.08307	1.19882	1.37287
1.4525	1.14957		1.48876	1.25515	0.92725	1.14257	1.09179	0.857493	1.32228	1.19726	1.31781	1.26801		1.18121	1.50793	0.944149	1.33241	1.20347
1.10891	1.4412		1.19056	0.94736	1.09144	0.92179	0.959497	1.02945	1.22619	1.36798	0.977607	1.4681		0.90923	0.9548	1.19829	1.36749	1.14991
1.19774	0.91462	1.75277	0.967502	1.15564	0.93601	1.2809	1.09768	1.23692	1.27199	1.18673	0.996495	1.22235		0.949372	1.39292	1.29081	0.969417	1.14332
1.14193	1.24223	0.933829	0.939656	0.946711	0.874002	0.912221	1.13685	0.794359	0.976796	1.22938	1.34282	0.856221		0.890173	1.40793	1.01381	0.998704	1.06981
1.25661	0.919951	1.05388	1.35838	0.980524	1.08412	0.952941	1.17116	1.37388	1.17979	1.49963	1.19322	1.15263	1.36166	1.03695	1.45867	1.03282		1.26893
1.24189	0.929488	0.916632	0.804814	0.90857	1.08042	0.963968	0.92973	1.0839	0.94784	0.973858	1.61481	1.16518		0.864068	1.35603	1.1221	1.06901	1.1784
1.29233	1.10363	1.34011	1.03204	1.3368	0.814587	0.955306	0.860455	0.896204		0.951153	1.17912	1.15027		0.812163		1.18174	1.60657	1.13572
	0.86016	1.51671	0.98772	0.849436	0.959802	0.968354	1.02884	1.62106	1.07074	1.05629		1.15111		0.910089	1.67931	1.27958	1.07501
0.878346	1.15903	1.13042	0.89255	0.801188	1.0713	1.23481	1.00939	1.3108	1.25575	1.18138		1.04474	1.80469	0.972841	1.65046	0.963678	1.07128	1.31309
1.78875	1.00453	1.09823		0.832197	1.10877	1.04447	1.27263	1.30302	1.08899	0.895376		1.06401	1.11132	0.973844	1.61817	0.948669	1.12446	1.08112
0.916036	1.027	1.44099	1.09198	0.799745	1.02694	1.02486	1.06902	0.785621	1.81309	1.03785		0.962808	0.98448	0.983568	1.31241	1.0412	1.23497	1.14433
1.06331	0.968218	1.35053	0.923797	1.22784	0.867717	1.2619	0.741487	1.04711	1.99893	0.905465		0.975833	1.2754	0.917311	1.60203		0.96464	1.20294
	1.03538	0.866563	1.08112	0.892998	0.89514	1.08114	0.98711	1.33441	1.81826	1.18475		1.13967	1.30452	1.34096	1.06845	0.998113	1.22364
1.38163	1.14352	1.35721	1.29441	0.924374	1.11342	1.20529	1.01983	0.893558	1.04881	1.4523		1.11553	0.82091	0.978167	1.63892	1.02948	1.07062	1.08001
1.28087	1.15263	1.11027	0.928794	0.874244	1.03523	1.01541	1.07339	0.934646	1.05967	1.46034		0.925354	0.807122	0.976829	1.42544	1.24059	1.02392	1.09612
	1.10567	1.51414	1.32517	0.873978	0.8858	0.968999	1.14639	1.15715		1.0425		0.842544	0.827351	1.06909	1.24745	1.13346	1.32546
1.44098	1.45887	1.27615	1.32421	0.817507	0.955669	0.952969	0.992067	1.08026	1.50558	1.36525		0.982696	1.51559	1.13231	1.31495	1.39195	1.05886	1.21172
1.17326	1.03355	1.20264	0.998566	1.49024	1.07336	1.04763	1.18801	1.4692	1.30965	0.998265		0.92887	1.10334	1.00287	1.04163	1.15948	1.0777	1.06892
1.07483	0.913907	1.14879	0.99793	0.939616	1.0878	1.26515	1.00039	1.62783	1.08383	1.05984		0.934582	0.964283	0.916458	1.16261	1.2319	0.907388	1.06791
1.25655	1.02052	1.2997	0.92479	1.23268	1.46148	1.05652	0.978653	1.04153	1.29128	1.10716		0.953668	1.02277	1.61749		0.987382	1.24825	1.1657
1.15868	1.02987	0.924687	1.16883	1.06292	1.00102	0.814945	1.04705	1.28958	0.951805	1.0637		1.24569	1.23019	0.915585	1.9899	0.949348	1.03602	1.23349
1.72717	1.27017	1.14253	1.03994	1.06567	0.997578	0.98594	0.863246	1.19028	1.55853	1.00444		1.61634	1.19661	1.01487	0.980342	1.04663	1.08871	1.06919
1.10848	1.12681	1.35282	0.87622	0.981256	1.29989	0.971852	0.937435	1.74355	1.77925	1.14766		1.16045	1.15073	0.927855	1.41564	1.01245	1.16684	1.21558
1.10643	1.01449	1.25979	0.877985	0.866974	0.967185	0.937739	1.12328	1.45073	0.985681	1.01604		1.03879	0.956399	1.09499	1.33434	1.26174	1.06429	1.15631
1.76122	1.06722	1.03556	1.07836	1.04802	0.946931	0.958224	1.24981	1.07401	0.950645	1.54929		1.08045	1.44281	0.915668	1.19289	1.12864	0.973139	1.08345
0.944344	1.00667	1.17575	0.869292	1.38399	0.823134	0.8872	1.13787	1.54991	1.64637	1.0351		0.953667	1.58905	0.975607	1.0487	1.29916	0.945361	1.21134
1.12533	0.899802	1.3843	1.03602	0.996789	0.984313	1.04627	0.972474	1.07241	1.04374	1.16385		1.02337	1.2124	0.993278	0.975176		1.16679	1.07239
1.08734	1.18819	1.01493	0.998035		1.1346	0.903563	1.14736	1.11099	0.866551	1.41336		1.00296	1.82982	1.23716	2.1591	1.1229	1.49934	1.54134
1.12788	1.00214	0.853041	0.901694	1.13088		0.945361	1.07062	1.67282	0.917856	1.19849		0.87622	1.18256	1.30778	1.98107	0.920099	1.60046	1.42225
0.808453	1.85923	1.09017	1.14765	1.07562	0.876823	0.853228	1.35472	1.03713	1.45609	1.11993		0.897351	1.38351	0.885323	1.27627	1.00227	1.52015	1.18499
1.0737		1.18013	0.924739	1.04447	1.29163	0.856526	0.95474	1.09722	1.25812	1.42289		0.924726	1.32196	1.07457	1.41902	1.19884	1.20453	1.25813
1.03153	1.52329	1.12497	1.06328	1.0579	0.942298	0.949441	0.990987	0.947184	1.16121	1.29421		1.02234	1.39826	1.24928	1.0733	1.048	1.00947	1.10519
1.45921	0.990367	1.12219	1.20418	0.88892	1.30905	0.889123	1.16188	1.27749	1.46939	1.13865		1.06138	1.00949	0.859019	1.58225	1.74717	1.11087	1.27985
1.28825	1.16317	1.25523	0.980207	1.18749	0.937561	1.02984	1.19386	1.08907	1.43676	1.12065		1.17391	1.53895	0.876908	0.898706	1.67568	1.163	1.23222
1.48299	0.924044	1.26083	0.856806	0.907194	1.03125	0.854083	0.991935	1.35285	1.2956	0.926233		0.970439	0.827623	0.978156	1.07793	1.33752	1.32543	1.10488
1.61559	1.01099	1.39342	0.948017	1.33251	1.14113	0.990411	1.27971	1.13245	1.02675	1.43428		1.40202	0.912312	0.907582	1.40329	1.27291	0.998583	1.1128
1.02585	1.20158	0.816401	0.92758	1.36276	0.904708	0.873421	1.04331	1.17498	1.37303	0.995374		1.06262	1.25844	1.42155	1.37441	1.45776	1.07571	1.3292
1.39917	1.52564	0.991005	1.08306	0.909974	1.0004	0.924699	0.841449	1.70135	1.08567	1.37209		0.962842	0.976107	0.995589	1.03986	1.28765	0.941317	1.02504
1.39033	0.925358	0.962611	0.810571	0.919714	0.987062	1.22682	0.770892	1.01957	1.47436	1.07738		1.10492	1.13309	0.960086	1.29524	1.23279	1.11218	1.17589
1.20357	1.18958	1.54932	1.15819	1.46457	0.87943	0.979405	1.18007	1.03807	1.10405	0.900854		1.02587	1.13824	1.39251	1.43074	1.04547	1.28025	1.15866
1.32888	1.15697	0.954126	0.94914	0.87464	1.07555	1.02772		1.29327	1.4863	1.31776		0.969167	0.990862	0.862138	1.66334	0.971414	1.00047	1.13463
0.984407	1.28942	1.22827	0.868434	0.87634	0.954448	1.42835		1.09098	1.04489	1.24373		1.07997	0.797551	0.881957	1.06877	1.06627		1.00113
1.03756	0.957279	1.43099	1.15405	1.36134	1.02973	1.0597		1.18119	0.903789	1.01009		1.08155	1.29734	1.27255	1.15846	1.05256	0.981574	1.10026
0.697081	0.935137	1.38895	1.02986	1.86432	0.917059	1.04499		0.87693	1.15952	1.40082		1.13347	1.13004	0.965639	1.51012	0.937167	1.00201	1.14967
1.08551	0.994698	1.39585	0.968443	0.893296	0.920352	0.888585		1.24937	0.888834	1.17519		0.917539	1.43244	1.09719	1.78869	1.01413	1.06754	1.23453
1.05245	0.969532	1.14698	0.939558	1.02249	1.14494	1.17296		1.1364	1.39126	1.7484		1.12288	1.01896	1.02713	1.27439	1.08644	0.941932	1.17967
1.56784	1.24206	1.45124	0.770767	1.03419	1.1471	1.08356		1.04599	1.49622	1.12999		1.03013	1.37208	0.889276	1.04448	1.00892	1.00331	1.00273
1.03557	1.08096	1.86275	1.40194	1.19076	0.909702	0.855837		1.40729	1.63237	1.07113		0.87163	1.1938	1.21264	1.1886	0.922497	0.957393	1.04124
0.924715	1.45774	0.822531	0.877101	1.05533	1.05811	1.54954		1.06216	1.37017	1.32017		1.10017	1.36556	1.21234	1.55438	0.982626	1.0075	1.26474
1.20202	1.07157	1.08976	1.06569	1.22793	0.866296	0.960985		1.32447	1.31674	0.946859		1.03548	1.19229	1.18902		1.66996	1.00836	1.24836
1.00967		1.24577	1.1974	0.959266	0.9722	1.02979		1.10669	1.18209	0.88658		1.11077	0.976573	0.83391	1.95642	1.06672	1.06289	1.17684
0.955332	1.31449	0.804226	1.03718	0.969946	0.848197	1.02975		1.03307	0.926306	1.0023		1.35888	1.02834	1.19957		1.19764	0.924634	1.11802
1.3266	1.20386	1.1682	0.935222	0.910731	1.13669	0.987634		1.1571	1.07432	1.08893		1.24705	0.921296	1.10463	0.974541	1.02428	1.11506	1.02916
1.55613	1.2486	0.941538	0.99672	0.848581	0.994559	1.00083		0.906665	1.07272	1.11445		0.876427	1.50119	1.11713	1.14877		1.14216	1.10341
1.18093	0.820195	1.35231	0.950307	1.07652	1.07524	0.918458		1.46026	0.987992	1.18345		1.91773	0.990708	0.892091	1.18488	1.32947	1.29518	1.29109
0.910119	1.05349	1.09367	1.02368	1.26097	1.40247	1.03076		0.991784	1.23282	1.00208		1.15782	1.18088	1.11972	1.04565	1.37659	1.01668	1.16881
0.974111	1.05782	0.849614	0.928364	1.80557	0.972205	0.892288		1.40371	0.895296				1.38246	1.26089	1.15202		0.930761	1.19022
1.00984	0.996985	1.41961	1.15167	1.3422	0.897519	0.84554		1.5408	1.0241	1.08358		1.39069	1.48007	0.773215	1.29567		1.1529	1.21642
1.99925	1.30011	1.25143	1.39975	0.913365	1.1657	1.18505		1.12591	0.857841			0.996431	1.19087	0.907586	1.19871		1.05476	0.896915
1.21892	1.04205	0.826531	0.883725	1.00038	1.24375	1.16675		1.01991	1.44986	1.22891		1.01261	1.17479	0.904131	1.20132		1.02618	1.12984
1.12485	1.13371	1.08276	1.08712	0.957481	0.880938	1.04347		0.911988	1.02327	0.861414		1.13349	0.914685	1.03527	1.26354		0.995691	1.01723
1.12792	1.15058	0.814697	1.02738	1.00243	0.940552	1.14467		1.34994	1.03527	1.36508		1.71797	1.09863	1.13342	1.13828		1.1074	1.28399
0.890329	1.26616	1.57119	0.988983	1.26082	0.857211	1.05087		1.03718	1.04286	1.1262		0.843314	0.992136	1.06828	1.29313			1.03704
0.896638	1.22249	1.08247	0.934697	1.21263	1.07108	1.16542		1.16004	1.1522	0.827483		0.878051	1.17727	1.04401	1.2789		0.996914	1.07758
0.992839	1.00934	1.14653	0.879444	1.06572		1.05334		1.45651	1.28569	1.96267		1.12352	1.11621	0.827554	0.959281		1.07924	1.18227
0.800709	1.44618	1.17294	0.95761	1.3244		1.10546		1.00486	1.48484	1.13517		1.39211	0.891697	0.937329	0.972032		1.04425	1.05869
1.13398	1.60356	0.817422	1.01799	1.13839		1.00193		1.08423	1.02497	1.31541		1.01369	1.1498	0.948276	0.947323		1.37446	1.08983
0.952602	1.19151	1.28183	1.14429	1.00066		1.19204		1.12505	1.23606	0.878551		1.0113	0.965831	1.27405	1.12591		1.09725	1.08841
1.37995	1.36167	1.1907	0.998	1.27396		1.13486		1.24934	1.04955	1.20047		0.838616	1.24002	0.952539	1.076		0.974623	0.959281
1.66534	1.20354	1.01315	0.920506	1.19602		1.12829		1.24659	1.36004	1.35303		2.38594	1.0236	1.27485	1.81609		1.05434	1.48813
1.07622	1.12878	1.21698	1.10571	0.888743		1.00788		1.48391	1.27148	1.04709		1.31476	1.19012	1.16378	1.29542		1.09501	1.24205
1.08474	1.13061	1.43821	0.99928	0.930397		1.45555		0.98584	1.02054	0.967638		1.66516	0.957867	1.1537	1.08496		1.15941	1.15053
0.983559	1.71357	0.928131	1.04009	1.12723		1.27005		1.91179	1.11451	1.02746		0.847409	1.28287	1.07482	1.27143		1.0946	1.146
1.01918	1.05841	0.8535	1.18793			0.881698		1.13037	1.07488	1.19372		1.01428	1.23337	1.24001	1.03263			1.16227
0.885041	1.05146	0.89364	0.989141			1.34772		1.04545	1.18328	1.01553		0.989703	1.13175	1.12535	0.970217		1.46062	1.22109
1.12024	1.13187	1.21911	1.0252			1.16469		1.33192	0.908374	1.37796		0.917967	1.18049	1.17264	1.17561		1.29939	1.19542
1.0334	1.00478	0.990953	0.892192			1.2937		1.13894	1.16533	1.00493		1.48383	1.24625	0.954189	1.00667		1.38599	1.25997
1.00752	1.24164	1.2048	0.982601			0.98535		1.19253	0.951514	1.08679		0.901344	1.3564	0.962769	1.46956		1.07838	1.15271
1.34486	1.01789	0.851651	1.04645			0.973509		1.32392	1.05163	1.21573		1.39426	1.1012	0.885117	1.3298		1.09114	1.17643
1.0853	1.06703	0.845585	0.952758			1.13528		0.943282	1.29781	1.11854		1.06024	1.65246	0.854508	1.19045		0.871305	1.14632
0.867569	1.17717	1.62783	0.937054			1.03689		1.30778	1.83454	1.07616		0.9766	1.03428	1.18403	1.5676		1.11623	1.26562
1.03176	1.21958	1.12018	0.91058			1.31807		1.36958	1.16304	1.00694		1.39704	0.906788	1.62009	1.24306		1.01839	1.25551
1.0517	1.11882	1.35693	1.12447			1.3616			2.58669	1.19122		1.12105	0.893235	1.27597	1.25291		1.00119	1.25236
0.997265	1.03614	1.57068	0.925552			1.01011			2.06321	1.23835		1.84557	1.51137	0.845196	1.2005			1.44349
1.09144	1.15728	1.14186	0.986562			1.17277			1.66263	1.10129		0.904293	0.914757	1.18935	1.24534		1.16241	1.15753
0.819604	0.883624	1.24172	1.02806			1.34153			1.64244	0.993229		0.977011	0.993656	1.57348	1.31292		0.958772	1.26664
1.09038	0.953708	1.06043	0.904001			1.00422			1.61618	1.31365		1.24659	1.13683	1.34068	0.927984			1.26842
1.33641	0.985624	0.944128	0.910063			1.25478				0.866018		0.981146	0.986596	1.10714	1.30509		1.32572	1.15357
0.847543	1.26836	0.992633	0.913375			0.964487			2.44134	1.05694		0.853501	1.17203	1.01759	1.27365		1.1587	1.26616
0.951967	1.04207	1.13416	1.01063						1.07605	1.13874		1.22807	0.888054	1.25753	0.998664		1.15038	1.13307
1.1817	1.20606	1.12226	0.90119			0.905458			1.2359	1.51463		1.04544	1.04186	1.06771	1.28133		1.12054	1.16868
1.07521	1.75447	1.02344	0.925407			1.15531			2.76434	1.0457		1.06009	1.13392	1.52469	1.46059		1.18938	1.41205
1.01578	0.870839	0.951345	1.0611			0.888352			1.9877	1.2735		1.14853	0.971158	1.09698	1.1972		1.35379	1.32836
0.952331	1.09047	1.25963	0.851809			0.984354			0.99134	1.21071		0.977104	1.10017	1.17773	1.15984		1.22205	1.16688
0.886984	1.18028	1.0875	0.924598			1.19801			1.28358	1.19089		1.75977	1.26432	1.22268	1.26441		1.25619	1.41509
1.09769	1.25997	1.0129	1.01805			0.938689			1.96224	1.08299		1.05849	0.971926	1.04562	0.992675		0.992814	1.07081
1.038	1.53403	1.017	1.22835			1.06198			1.09977	0.954892		1.31912	1.27295	1.44418	1.29135		1.12136	1.2439
1.02911	1.21102	1.17753	0.96811			1.04686			1.30004	1.20375		1.17623	1.2488	1.15006	1.20188		1.15853	1.22353
0.991996	1.20165	0.833611	1.33535			0.891092			1.00768	1.3662		1.09163	0.982761	1.28385	1.14029		0.917231	1.10243
1.17155	1.16772	0.999735	1.10011			0.932852				1.28097		0.886751	1.35506	1.20244	0.937456		1.39147	1.19444
0.991002	1.28531	0.979638	1.04506			1.17042			1.20376	0.952736		0.966801	0.96931	1.29173	1.21786		1.07228	1.1153
0.88783	1.61396	1.36633	1.12379			1.30379			2.49542	1.04409		1.32026	1.52101	1.31082	1.42551		1.19997	1.45759
1.62769	0.974526	1.13566	0.89889			1.23862			1.83426	0.996005		0.963022	1.02012	1.35605	1.60935		0.996482	1.22567
1.11291	1.59151	1.24621	1.19914			1.13219			0.894192	0.906628		1.30328	1.23358	1.08693	1.19692		0.987447	1.03849
1.15065	1.59461	0.959913	0.800175			1.15124			1.58019			1.02498	1.09227	1.37183	1.15073		1.00725	1.15566
0.933866	1.05181	1.08291	1.10614			1.08281			1.32597	0.943532		1.22359	1.03915	1.21076	1.97739		1.20775	1.40697
0.861447	1.27967	0.963156	1.10528			1.08307			1.49372	0.977645		1.16402	1.12824	1.2019	1.33838		1.14485	1.25407
1.84337	1.04518	1.06729	0.952603			0.96574			1.37916	0.93139		0.977618		1.41137	1.1844		1.0591	1.0869
1.03505	1.02962	0.936033	1.08017			1.10809			2.0586	1.11005		0.907039		0.913152	1.25986		1.0494	1.18388
1.16837	1.00126	1.03671	1.00404			0.838095			1.36118	0.943369		1.10779		1.1501	1.11291		1.19011	1.1571
1.43546	1.88988	1.55102	0.850483			1.07136			0.953303	1.22181		1.30605		0.962128	1.19192		0.953367	0.936919
1.21698	1.05177	1.10913	1.07028			1.02953			1.27388	1.08924		1.10364		1.21388	1.02141		1.05178	1.09813
0.956308	1.38548	1.17896	0.931725			0.996621			1.62843	1.04654		1.18418		1.33703			1.57948	1.4585
0.961048	1.26218	0.827726	0.981267			0.970661			1.14091	1.07792		1.19492		1.00851	1.80196		1.13043	1.32582
0.925649	1.21754	1.12784	0.905807			0.925033			2.17168	1.03818		1.05719		1.43674	1.28387		1.13695	1.36643
1.06769	1.18348	1.13196	1.1409			1.01371			1.17711	0.883025		1.21757		0.989094	2.05931		1.40624	1.43077
1.05563	1.5812	1.16825	0.97088			1.35342				1.83154		1.50294		1.05083	1.26217		1.1489	1.322
1.00836	1.7534	1.14251	1.0827			1.00948			0.875038	1.29486		0.944245		1.21777	1.05674		1.06029	1.01541
1.06621	1.59837	0.948298	0.936781			1.22082			1.39412	1.51393		1.05516		1.16891	1.28426		0.978299	1.18923
1.3107	1.3969	0.924379	0.877916			1.06286			1.5492	1.15518		0.892093		1.1663	1.42938		0.946358	1.14112
0.919374	0.968766	0.997726	0.91535			1.04811			0.901626	1.77639		1.00875		1.21156	1.30852		0.988034	1.25569
1.58663	1.13825	0.893642	0.916767			1.026			1.19607	1.11508		0.929156		1.5816	1.86212		1.03534	1.34635
1.11579	0.987964	1.13824	0.90617			1.03434			1.11248	1.16361		2.29292		0.856504			1.04108	1.32908
1.44183	1.08567	0.885877	0.823222			0.946686			1.27874	0.813822				1.20094	1.27556		1.09808	1.13593
1.57621	0.96139	1.10298	1.16456			0.88076			1.09244	1.0697				0.968321	1.67111		1.11009	1.17952
1.05148	1.3984	1.21328				1.08359			1.37189	1.05998		1.24559		1.0389	1.33778		1.19873	1.20033
1.46266	1.41303	1.03645				1.01829			0.946536	1.48163				1.03072	2.09262		0.985432	1.31088
1.3461		1.07241				1.14666			1.22354	0.987878		2.98046		0.912713	1.64416		1.06219	1.51005
1.1782	1.52536	1.53527				1.15654			1.39272	1.28226				1.29946	1.07551		1.14474	1.14822
1.05296	0.973994	1.25907				1.03044			1.04947	1.09056		1.00194		1.01197			0.934477	0.972288
1.03668	1.12252	1.07878				1.11505			1.27325			0.84848		0.776224	1.00013		0.985207	0.91857
1.06262	1.07413	1.09326				1.06175			1.01178	1.23292		1.0617		1.18847	1.1442			1.15097
1.12774	1.38815	0.931352				1.11055			0.953093			0.804258		1.15882	1.04638			0.970013
1.08548	1.21436	1.08767				1.11438			1.64441	1.24866		1.72083		1.69928	0.966274			1.50195
1.17505	1.08451	1.19225				1.17809			0.989604			0.789442		1.27431				1.02537
0.909074	1.37555	1.14439				0.985127			1.15222	1.34225		1.22582		1.35474				1.31112
1.1996	1.14295	0.909115				1.19169			1.21668	1.57992		1.25739		1.20389				1.35136
1.34195	1.24245	1.37932				1.0643			1.77181	1.27097		1.67387		0.949811				1.34679
1.36344	1.40727	0.983638				1.24835			1.06609			0.888906		1.1397				0.977447
1.27176	1.45903	1.12671				1.25684			1.07206	1.54349		0.88596		0.920859				1.0036
1.34927	1.23952	1.07812				1.02396			1.32295	1.13694		1.79297		0.996759				1.29216
1.23909	1.36342	1.09302				0.939538			1.42			1.0076		0.885094				0.970527
1.53114	0.897707	1.30748				1.16415			1.18053	1.14283		1.10946		0.914496				0.999098
1.38408	1.08577	0.848124				0.851708			1.30438	1.19241		0.804147		1.31171				1.10985
1.38848	1.0975	1.34791				1.06852			1.41032	1.16004		0.825946		1.35383				1.13171
1.49965	1.10938	0.905226				1.33777			1.0008	1.43213		0.924538		1.2939				1.16019
1.33142	0.944996	1.39565				1.05997			1.58137	1.6032		1.42321		0.941019				1.33597
1.80298	1.37514	1.10305				1.12359			1.17501			1.34279		0.904996				0.988216
1.03363	1.21025	0.851659				1.03015			1.05404	1.34652		0.996135		1.21186				1.17572
1.42385	1.24505	1.36583				1.01897			1.04445	1.09436		1.22483		0.931038				0.96241
1.36759	1.42765	0.991949				1.27668			1.07238			1.00972		1.29828				1.1094
1.21317	1.07968	1.20375				1.43829			1.29898			0.988028		1.02803				1.09396
1.0016	1.95809	1.21013				1.18408			1.54312	2.08263		1.24915		1.29838				1.50589
1.04584	1.20622	0.880246				1.57595			1.18463	1.15676		1.04222		1.33015				1.26889
1.26626	1.51878	0.981665				1.33481			1.06877			8.69711		0.990022				4.1292
1.30943	1.13803	0.926875				1.23829			1.52205			0.942251		0.925496				1.05311
1.1299	1.61353	1.25125				1.24025			1.3259	1.13475		0.929123		1.27919				1.11455
1.13125	1.62613	0.856072				1.06067			2.52656	1.65269		1.16535		1.00248				1.48601
1.41488	0.990036	0.968028				1.16956			1.20591			1.33539		0.940801				1.12532
1.19349	1.31057	0.915835				0.940018			1.12967	1.17814		0.922693		0.932317				0.953689
0.997086	1.10263	1.28124				1.03793			1.17241	1.02931		1.12312		1.07277				1.09046
1.02913	1.47106	0.964964				0.99397			0.894698	2.04051		0.981806		1.27555				1.30306
0.953595	1.36138	1.02612				1.06972			1.71755	1.15349		1.15287		1.13774				1.279
1.09685	1.13147	1.15055				1.06651			1.12513	1.74814		1.20782		1.11241				1.30697
1.47935	1.48489	0.791715				1.07813			1.17171			1.07474		0.927463				0.938528
1.24236	1.15166	1.19287				1.11503			2.21108	1.79231		1.15294		1.20891				1.55495
1.84721	1.29926	0.923939				0.931187			1.64352			1.29585		1.02529				1.14324
1.84871	1.47272	0.98177				0.981372			1.52494	1.68956		1.09165		1.18517				1.21747
1.05118	1.21751	1.20425				0.987961			1.19457	1.71156		1.19677		0.970153				1.23392
1.39165	1.3865	0.899126				1.09301			1.21967	1.62166		1.19001		1.07267				1.21684
1.00777	1.02409	0.911568				1.06833			0.962458	1.21325		1.14563		1.1538				1.17223
1.34475	1.70113	1.35496				1.07572			1.11759	2.17297		0.880109		1.04671				1.15648
1.10993	1.04242	1.47654				0.987557			1.68977	0.988931		0.977149		0.981119				1.07392
1.36921	1.78905	0.868806				0.88881			1.30719	0.966889		1.36568		0.88493				0.985684
1.1169	1.49596	1.23539							0.989558	1.18777		1.02102		0.882306				0.925275
1.27636	1.13651	0.90485				1.19913			1.32112			1.06776		1.18218				1.18157
1.01703	1.01978	0.893046				1.20196			1.30801	1.63426		0.872517		1.16445				1.28112
1.37008	1.28071	1.27455				1.05988			1.11414	1.55679		1.74333		0.850943				1.25737
1.21551	1.05357	1.36626				1.00944			1.34845	1.15522		1.1117		0.851974				1.02591
1.44984	0.987039	1.08012				0.977953						1.05991		1.11605				1.03121
1.17088	0.953399	1.2018				1.00858			1.05879			1.09581		0.928246				0.987197
1.02917	1.48827	1.25475				0.989661			1.63618			1.57194		1.27254				1.47283
1.02527	1.03165	1.40624				0.898903			1.67276	1.02255		0.810573		1.30459				1.1714
1.00749	1.1401	0.938082				1.26649			1.11252	1.88088		1.15256		1.28171				1.43959
1.21272	1.02864	1.4205				1.34349			1.04182	1.33123		0.941805						1.10255
1.57339	1.17299	1.12536				1.10217			0.877427	1.92983		1.21609						1.30717
	1.0247	1.08221				1.0311			2.19159	1.65522		1.47713
1.32995	0.972723	1.55639				1.08744			0.895193	1.57871		0.874101						1.05483
1.34593	1.14489	1.29574				0.98478			1.28298	1.29388		1.00713						1.11258
1.06713	0.943264	1.18472				1.06951			1.76561	1.14427		1.42763						1.49604
0.927734	1.0785	0.915257				1.07012			2.50224			1.34397						1.9124
1.00556	0.978122	1.31015				1.25678			1.09475	1.202		0.951738						1.10707
1.08046	1.17149	1.20154				0.916515			1.45719	1.58742		1.06895						1.33983
1.38364	1.34997	1.28486				1.22967			1.40224			1.13292						1.20042
0.942834	0.964661	1.08405				1.03689			0.935443	1.40287		1.5786						1.41831
1.15581	1.41629	0.712183				1.23814			1.13862			1.33736						1.27491
1.04743	1.40151	1.29314				1.02326			1.15272	2.15022		1.03777						1.4293
1.37736	1.04906	1.19417				1.01083			0.832747	1.9485		0.992964						1.22018
1.19972	1.52283	1.29083				1.14158			2.34979	1.5051		1.05544						1.55996
1.13312	1.00615	1.13844				1.0596			0.896432	1.99912		0.888486						1.26378
0.932936	0.928345	1.2868				1.24831			0.935065	1.11927		1.19158						1.1569
0.937947	1.26264	0.837692				0.9606			1.18452	1.86606		1.81164						1.74977
0.918157	0.93092	0.914147				1.09113			1.08941	0.940031		1.22915						1.15479
1.27483	1.85259	1.18664				1.11605			1.01273			1.61114		1.09111				1.1731
1.60884	1.32105	0.965859				0.838459			2.55117	1.20889		1.23724		1.06591				1.35887
1.3245	0.876756	1.44092				1.08644			1.29969	1.26883		0.948532		0.836768				0.987156
0.998664	1.55622	1.13301				1.27225			1.27785	1.28884		1.28696		1.01211				1.19203
1.24866	1.5089	1.21316				0.969834			0.952305	1.52094		1.14325		1.23863				1.16069
1.17203	0.892059	1.02753				0.929665			0.941339	1.25383		0.872952		1.13772				1.04535
1.31394	1.08475	1.46645				1.06026			0.849625	1.60838		0.969546		1.46742				1.22757
1.45208	0.93872	0.86759				1.05397			1.14635	0.949935		0.895942		1.22253				1.02925
0.98187	1.10465	1.09895				1.37257			1.0083	1.93945		0.896525		0.997749				1.22862
1.06431	1.04078	1.13343				1.01478			0.949988	1.27537		1.04301		0.993875				1.04984
1.15991	0.995589	1.30818				0.85994			1.60821	1.31024		0.971487		0.890386				1.09704
1.2762	0.979742	1.77719				0.953913			1.08614	1.28808		0.966841		1.04135				0.997865
1.05534	1.76511	1.13184				1.01712			3.20524	1.65678		1.035		1.11163				1.6091
1.23023	1.46486	0.958337				0.866204			1.6663	1.14861		0.873174		1.16274				1.11147
0.99941	0.979035	0.84389				1.03048			0.937759	1.29203				1.47668				1.37959
1.24989		1.371				0.990544			0.942902	1.00282				1.28707				1.04817
1.16705		1.37842				1.03568			1.28194	1.24775				1.54619				1.41401
1.44295	1.16119	1.21667				1.1421			1.03166	1.36548				1.1375				1.12321
1.70083	1.79351	0.813053				1.30254			1.31332	1.2117				1.115				1.06563
1.33111	0.948514	1.16481				0.952263			1.57087	0.948253				0.875361				1.0111
1.42693	0.948212	1.16233				0.932774			1.45745	1.06194				0.88828				1.00475
1.22715	1.56812	1.15307				1.24827			0.978002	1.62636				0.842738				1.03777
0.919812	1.06768	1.08876							1.14228					1.13603				1.17682
1.19494	0.957573	1.02001				0.999989			1.32323	1.45057				1.22734				1.36031
1.12787		1.1043				1.14823			1.33744	1.16392				1.63511				1.50947
1.33695		0.915432				1.10743			1.39461	1.42013				1.13665				1.28905
0.893956		1.42723				1.01641			1.35201	1.06254				1.0274				1.11818
1.43891		1.17838				1.18918			0.869084	1.27268				1.42259				1.20397
0.872511		1.18134				1.31959			1.07878	1.33438				0.938063				1.15146
0.96884		0.922566							1.28149					0.937642				1.08478
1.04426		0.988454							1.06434	0.933715				1.03846				1.01073
1.08252		1.28779							2.03506	1.07743				1.04244				1.33933
0.921053		0.901957							1.04219	1.35737				1.10703				1.23937
		0.990957							0.884743	1.46936				1.88598
		1.35625							1.29151	1.04595				1.00742
		1.17111							2.86821	1.61666				1.03132
		1.05506							0.979813	1.41372				0.852489
		1.00746							0.974158	1.93245				1.26277
		0.851322							1.19959	0.982112				1.14884
		0.837755							1.35762	1.19043				1.1038
		0.880931							1.26131	0.915436
		0.863968							1.56257	1.08141				1.04944
		1.00172							1.39494	1.40314				1.42607
		1.01975							2.74389	1.3791				1.05298
		1.10994							1.75918	1.01785				1.26444
		0.972488							1.43192	1.14478				1.04286
		1.32328							1.67017	1.43075				1.2394
		1.04221							1.8726	1.08327				1.0435
		1.00574							1.31403	1.68823				1.21044
		1.08832							1.74442	1.75181				1.51782
		1.02396							1.12294	1.0378				1.03713
		1.22052							1.08547	1.37483				0.874966
		1.02894							1.45265	1.13047				1.23003
		1.09288							1.08585	1.46721				1.46964
		1.09165							1.02046	1.2942				1.20059
		0.932431							1.81093	1.15589				0.71036
		0.899443							1.19851	1.11822				1.19677
		1.05774							1.10322					0.957258
		1.71591							0.923179	1.39036				1.49252
		1.50567							1.82719					1.26464
		0.927109							0.876274	1.15044				0.935384
		1.32193							0.887655	1.1232				1.04597
		0.981938							2.24163	0.940642
		1.07641							1.46324	0.968404				1.18988
		1.031							1.067	0.924064				1.11636
		1.1973							1.24202	0.988835				0.916751
		1.36019							1.24598	1.40352				1.31131
		1.14531							0.929469	1.57285				1.0379
		1.00692							2.00782	1.3439				1.04987
		1.34438							1.10971	0.90448				0.918501
		0.997263							1.36828	1.51641				1.09014
		1.26806							0.962794	1.16555				1.0542
		0.860197							1.20398	1.08072				1.28616
		1.03054							0.898837	1.16813				1.06985
									1.09021	0.982713				1.05734
		1.372								1.07836				1.29289
		1.09496							1.15613	1.13236				1.14195
		0.957172							0.870913	1.25168				1.16538
		0.92057							2.01719	1.29041				1.03229
		1.14679							1.11035	1.24693				1.50055
		1.15084							0.948663	0.90026				1.14358
		1.03967							1.07147	1.08193				0.846293
		0.947564							1.45567	1.30187				1.02502
		0.996441								0.983714				0.860579
		0.961592								1.7222				1.3009
		0.864853								0.933449				1.20689
		1.21316								1.48358				1.11035
		1.30112								2.17695				1.28661
		0.970305								1.78802				1.35516
		1.18544								1.37975				1.11055
		1.43505								1.48511				1.69941
		0.973708												1.81299
		1.28504								1.749				1.35063
		0.980605								1.09915				1.12953
		1.33577								0.934443				1.00059
		0.982532								1.13493				1.17535
		0.954764								1.37441				1.03209
		1.0457								1.0673				0.913777
		0.990906												1.04731
		1.22583								1.1494				1.30183
		1.06958								1.42109				1.02869
		0.970832								0.9626				1.31696
		0.969929								0.985642				0.942357
		1.49486								1.21444				1.2297
		1.12866								1.4298				1.06595
		1.20126												1.04924
		0.953397								1.14815				1.60983
		1.04739								0.94358				0.855056
		1.10341								1.18685				0.930194
		1.21388								1.57683				0.902918
		0.793047								1.08228				1.18447
		1.16553								1.32617				0.95479
		0.956288								0.945676				1.35825
										1.13102				1.25616
		1.04485								0.909514				1.0209
		0.963209								1.72346				1.2908
		1.13973								1.41193				0.965514
		0.954043								1.91231				1.08152
		1.11637								0.917303				1.23944
		1.25821								1.26993				0.950891
		1.33654								0.964547				1.05431
		1.23734								1.17698				1.20061
		1.38428								1.09744				1.24969
		1.23292								1.10313				0.943196
		1.15969								0.95546				1.20381
		1.08155								0.948664				1.40616
		1.14182								0.964726				0.886267
		1.1912								1.17314				1.37054
		1.10104								1.13741				1.22278
		1.17922								1.3786				1.2979
		0.818726								1.12136				1.52967
		1.07935												1.49402
		1.06821												0.76515
		1.15807												1.06901
		1.17929
		0.997107												1.39275
		1.01406												1.22398
		1.29908												0.933141
		1.24672												1.37096
		1.10535												1.38974
		1.06603												1.10609
		1.02295												1.07997
		1.24593												0.852441
		1.10352												1.23898
		1.05425												1.06316
		1.00599												0.94128
		1.01701												1.15781
		1.22685												1.2645
		1.06892												1.0061
		1.0727												1.20866
		0.882116												1.11435
		1.39106												1.01236
		1.22034												1.1742
		1.05607												1.17215
		0.859954												1.40027
		1.03676												1.30773
		1.28825												1.07247
		1.44732												0.879652
		1.42464												1.35677
		1.25809												1.02354
		1.39156												1.02464
		1.20554
		1.1602
		1.15739
		1.22334
		0.931444
		1.03078
		1.40951
		1.12368
		1.29803
		0.982078
		1.19639
		0.948253
		1.12776
		1.13393
		0.875098
		1.04311
		1.1579
		1.09941
		1.30001
		1.3419
		0.883741
