# Supplementary material for: VASP-mediated actin dynamics activate and recruit a filopodia myosin
Source: eLife. 2021 May 27;10:e68082. doi: 10.7554/eLife.68082 (PMC8352590; doi:10.7554/eLife.68082)
Supplement: Table 1—source data 4. [file elife-68082-table1-data4.xlsx]

## Sheet: Page 4 Actin Drugs ANOVA
Table 1/Figure 2H. ACTIN DRUGS ANOVA
Number of families	1
Number of comparisons per family	4
Alpha	0.05
Dunnett's multiple comparisons test	Mean Diff.	95.00% CI of diff.	Significant?	Summary	Adjusted P Value	B-?
1% DMSO vs. 5μm LatA	0.1786	0.1055 to 0.2518	Yes	****	<0.0001	D	5μm LatA
1% DMSO vs. 1uM CytoA	0.1762	0.08363 to 0.2687	Yes	****	<0.0001	F	1uM CytoA
1% DMSO vs. 50nM Jasp	-0.118	-0.1769 to -0.05915	Yes	****	<0.0001	J	50nM Jasp
1% DMSO vs. 25uM CK666	0.07562	0.01923 to 0.1320	Yes	**	0.0039	Q	25uM CK666
Test details	Mean 1	Mean 2	Mean Diff.	SE of diff.	n1	n2	q	DF
1% DMSO vs. 5μm LatA	1.196	1.017	0.1786	0.02974	224	126	6.007	1034
1% DMSO vs. 1uM CytoA	1.196	1.02	0.1762	0.03762	224	65	4.682	1034
1% DMSO vs. 50nM Jasp	1.196	1.314	-0.118	0.02394	224	280	4.93	1034
1% DMSO vs. 25uM CK666	1.196	1.12	0.07562	0.02293	224	344	3.298	1034
