# Supplementary figures and images for: VASP-mediated actin dynamics activate and recruit a filopodia myosin
Source: eLife journal article supplement (doi:10.7554/elife.68082), 2021-05-27

Figure 3 figure supplement 1

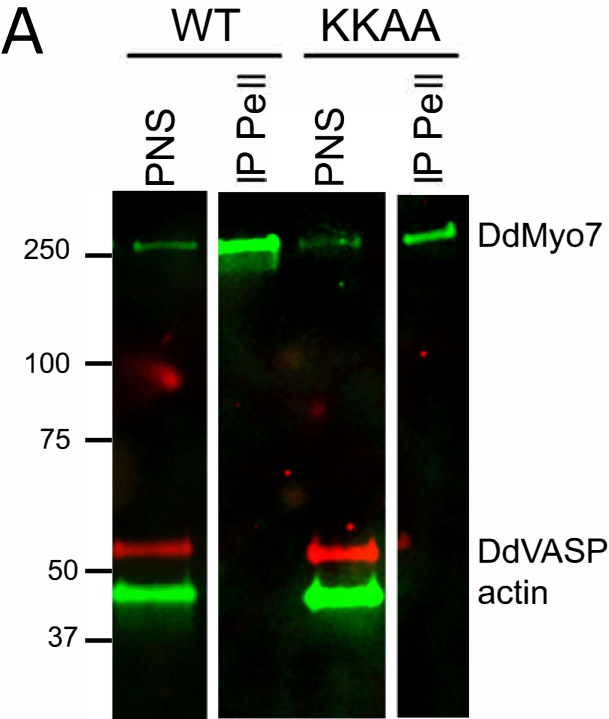

Supplement: supp [file elife-68082-supp-v1.zip]
